# Supplementary material for: De Novo Design and Evolution of an Artificial Metathase for Cytoplasmic Olefin Metathesis
Source: Research Square preprint supplement (doi:10.21203/rs.3.rs-5849532/v1), 2025-02-13
Supplement: Supplementary file 1 [file 0e1714fd0f26fad75c899157.pdf]

# Supplementary Information

## ***De Novo* Design and Evolution of an Artificial Metathase for Cytoplasmic Olefin Metathesis**

Zhi Zou<sup>‡1,3</sup>, Indrek Kalvet<sup>‡2,4,5</sup>, Boris Lozhkin<sup>‡1</sup>, Elinor Morris<sup>1</sup>, Kailin Zhang<sup>1</sup>, Dongping Chen<sup>1</sup>, Marco L. Ernst<sup>1</sup>, Xiang Zhang,<sup>1</sup> David Baker<sup>\*2,4,5</sup>, Thomas R. Ward<sup>\*1,3</sup>

<sup>1</sup> Department of Chemistry, University of Basel, BPR 1096, Mattenstrasse 24a, 4058 Basel, Switzerland.

<sup>2</sup> Department of Biochemistry, University of Washington, Seattle, WA, USA.

<sup>3</sup> National Center of Competence in Research “Molecular Systems Engineering”, Basel, Switzerland.

<sup>4</sup> Institute for Protein Design, University of Washington, Seattle, WA, USA.

<sup>5</sup> Howard Hughes Medical Institute, University of Washington, Seattle, WA 98105, USA

\* E-mail: [dabaker@uw.edu](mailto:dabaker@uw.edu)

\* E-mail: [thomas.ward@unibas.ch](mailto:thomas.ward@unibas.ch)

‡ There authors contributed equally to this work

### **Table of Contents**

|                                                                              |          |
|------------------------------------------------------------------------------|----------|
| <b>1. Supplementary Methods</b>                                              | <b>4</b> |
| 1.1. Chemicals and Materials                                                 | 4        |
| 1.2. Chromatographic methods (LC-MS and GC-MS)                               | 4        |
| 1.3. Synthesis of the metathesis cofactor <b>Ru1</b>                         | 5        |
| 1.4. Synthesis of ring-closing metathesis substrates and products            | 12       |
| 1.5. Computational design of <b>Ru1</b> -dnTRP                               | 14       |
| 1.6. Expression of dnTRP in shaking flasks and 96-well microtiter plates     | 17       |
| 1.7. Circular dichroism (CD) spectroscopy of dnTRP                           | 17       |
| 1.8. Determination of the binding affinity ( $K_D$ ) of <b>Ru1</b> to dnTRPs | 18       |
| 1.9. Native mass spectrometry of <b>Ru1</b> -R0                              | 18       |
| 1.10. Size-exclusion chromatography of <b>Ru1</b> -R0                        | 18       |
| 1.11. Optimization <b>Ru1</b> -dnTRPs-based RCM in cell-free extract (CFE)   | 19       |
| 1.12. Directed evolution of the <b>Ru1</b> -dnTRP <sub>18</sub>              | 19       |
| 1.13. Characterizations of evolved <b>Ru1</b> -dnTRP variants                | 21       |
| 1.14. X-ray study of <b>Ru1</b> -dnTRPs                                      | 22       |

## Supplementary Information

|           |                                                                                                                                                                                |           |
|-----------|--------------------------------------------------------------------------------------------------------------------------------------------------------------------------------|-----------|
| 1.15.     | Cytoplasmic RCM in <i>E. coli</i> .....                                                                                                                                        | 23        |
| 1.16.     | Inductively-coupled plasma mass spectrometry (ICP-MS) .....                                                                                                                    | 24        |
| 1.17.     | Cell viability: colony formation assay .....                                                                                                                                   | 25        |
| <b>2.</b> | <b>Supplementary Figures</b> .....                                                                                                                                             | <b>26</b> |
| 2.1.      | Supplementary Fig. 1. Procedure adopted for the design of the cofactor <b>Ru1</b> binding site with Rosetta FastDesign.....                                                    | 26        |
| 2.2.      | Supplementary Fig. 2. Expression and purification of dnTRP designs.....                                                                                                        | 27        |
| 2.3.      | Supplementary Fig. 3. Circular dichroism (CD) spectra of dnTRP_18 at different pHs (a), and following incubation at 98 °C (b). .....                                           | 28        |
| 2.4.      | Supplementary Fig. 4. Tryptophan fluorescence-quenching assay for the determination of the binding affinity of Ru1 to dnTRPs. ....                                             | 29        |
| 2.5.      | Supplementary Fig. 5. Native mass spectrometry and size-exclusion chromatography of Ru1·R0.....                                                                                | 30        |
| 2.6.      | Supplementary Fig. 6. Optimization of ring-closing metathesis in cell-free extract (CFE).<br>31                                                                                |           |
| 2.7.      | Supplementary Fig. 7. Expression and determination of the concentration of dnTRP_18 in the cell-free extract in a 96-well plate format.....                                    | 32        |
| 2.8.      | Supplementary Fig. 8. Directed evolution of <b>Ru1</b> -dnTRP using cell-free extracts at pH 4.2. 33                                                                           |           |
| 2.9.      | Supplementary Fig. 9. Removal of N-terminal His-tag from dnTRPs and resulting $K_D$ of Ru1-dnTRP. ....                                                                         | 34        |
| 2.10.     | Supplementary Fig. 10. Activity of <b>Ru1</b> -dnTRPs at different temperatures and in presence of varying concentrations of glutathione (GSH). ....                           | 35        |
| 2.11.     | Supplementary Fig. 11. RCM of substrate 1a by <b>Ru1</b> and <b>Ru1</b> -dnTRPs at 50 °C and different pHs. ....                                                               | 36        |
| 2.12.     | Supplementary Fig. 12. Comparison of RCM performance for different substrates catalyzed by <b>Ru1</b> and <b>Ru1</b> -dnTRPs-ΔHis ArMs. ....                                   | 37        |
| 2.13.     | Supplementary Fig. 13. Structural characterization of <b>Ru1</b> -dnTRPs.....                                                                                                  | 38        |
| 2.14.     | Supplementary Fig. 14. Structure prediction analysis of <b>Ru1</b> -dnTRPs.....                                                                                                | 39        |
| 2.15.     | Supplementary Fig. 15. Expression of dnTRPs and optimization of [ <b>Ru1</b> ] for the assembly of cytoplasmic Ru1-dnTRPs and corresponding cell viability determination. .... | 40        |

## Supplementary Information

|           |                                                                                                                                                                                                     |           |
|-----------|-----------------------------------------------------------------------------------------------------------------------------------------------------------------------------------------------------|-----------|
| 2.16.     | Supplementary Fig. 16. Fragmentation of <i>E. coli</i> cells for inductively coupled plasma mass spectrometry (ICP-MS) determination of [Ru] concentration.....                                     | 41        |
| 2.17.     | Supplementary Fig. 17. Screening dnTRP_R5 L8X, L113X, A148X and L183X variants at pH 6.0 for improved RCM activity in whole cells with the substrate 1a. ....                                       | 42        |
| 2.18.     | Supplementary Fig. 18. Validation of the activity profile of variants evolved in the whole cell assay using purified dnTRP-ΔHis proteins, spiked with increasing amounts of glutathione (GSH). .... | 43        |
| <b>3.</b> | <b>Supplementary Tables .....</b>                                                                                                                                                                   | <b>44</b> |
| 3.1.      | Supplementary Table 1 Primers used for site-directed (SDM) and site-saturation mutagenesis (SSM) PCRs.....                                                                                          | 44        |
| 3.2.      | Supplementary Table 2 Primers used for error-prone PCR and fragment shuffling. ....                                                                                                                 | 45        |
| 3.3.      | Supplementary Table 3 Primers used for generation of L8X, L113X, A148X, L183X and their corresponding recombined variants (X represents any amino acid residues except cysteine and proline). ....  | 45        |
| 3.4.      | Table S4. The data have been deposited under PDB: 9GVF, 8S6P, and 9H3C.....                                                                                                                         | 48        |
| <b>4.</b> | <b>Appendix .....</b>                                                                                                                                                                               | <b>49</b> |
| 4.1.      | DNA and corresponding protein sequence of the dnTRP designs.....                                                                                                                                    | 49        |
| 4.2.      | Uncropped scans of all blots and gels.....                                                                                                                                                          | 53        |
| <b>5.</b> | <b>References .....</b>                                                                                                                                                                             | <b>58</b> |

# Supplementary Information

## 1. Supplementary Methods

### 1.1. Chemicals and Materials

All chemicals were purchased from commercial sources and used without further purification. Compound **1d** (98%), **2e** (99%), methanol (99%), trifluoroacetic acid (TFA, 99%), and benzyltriethyl-ammonium bromide were purchased from Sigma Aldrich. Dimethyl sulfoxide (DMSO, 99%), MgCl<sub>2</sub>, MnCl<sub>2</sub>, KH<sub>2</sub>PO<sub>4</sub>, K<sub>2</sub>HPO<sub>4</sub>, Na<sub>2</sub>HPO<sub>4</sub>, and NaH<sub>2</sub>PO<sub>4</sub> were purchased from Acros Organics. The substrates **1a**, **1b**, **1e**, **1f**, and **1g** their corresponding cyclized product **2a**, **2b**, **2f**, and **2g** were synthesized as previously described<sup>1-3</sup>. The synthesis of **1c**, **1e**, **2c**, and **2d** is described in Section 1.4 of this Supplementary Information.

Phusion high fidelity DNA polymerase, Taq polymerase 2X Master Mix, NEBuilder® HiFi DNA Assembly Master Mix, NEBridge® Golden Gate Assembly Kit (*Bsa*I-HF® v2), *Dpn*I restriction enzyme, the T4 DNA ligase, gel extraction-kit, plasmid miniprep-kit, and *E. coli* LEMO21 chemically-competent cells were purchased from New England BioLabs (NEB). The oligonucleotides for polymerase chain reaction (PCR) were ordered from Microsynth AG. The DNA sequences for the 21 dnTRPs (in pET-29b vector) were obtained as sub-cloned plasmids from Integrated DNA Technologies (IDT).

### 1.2. Chromatographic methods (LC-MS and GC-MS)

The cyclized products **2a**, **2b**, **2c**, and **2d** were quantified by UPLC-MS. After ring-closing metathesis (RCM), samples were diluted with four or nine reaction volumes of methanol (with [benzyltriethyl-ammonium bromide] = 200 µM used as the internal standard). Analyses were performed on a Waters Acquity UPLC system using an Acquity UPLC CSH C18 column (2.1 x 50mm, 1.7 µm particles). The flow rate was maintained at 0.5 mL min<sup>-1</sup>. The elution program began with 75% water (0.1% FA) and 25% acetonitrile (ACN, 0.1% FA), held from 0-0.5 min, followed by a linear gradient reaching 98% ACN (0.1% FA) and 2% water (0.1% FA) from 0.5 to 3.2 min. This composition was held until 3.5 min, then gradually returned to 75% water and 25% ACN by 3.8 min, and remained constant until 4 min.

GC-MS analysis was performed to quantify the cyclized products **2e**, **2f**, and **2g**. The products were extracted from the reaction mixture with ethyl acetate (EtOAc) and analyzed using a Shimadzu GC-2010 Plus system coupled with a GC-MS-QP2020 detector (column: Agilent HP-5 30 m x 0.25 mm x 0.25 µm). The temperature program was initiated at 40 °C, held for 0.5 min, then increased to 280 °C at 35 °C·min<sup>-1</sup>, and maintained at 280 °C for 0.5 min. Cyclized products **2e**, **2f**, and **2g** were detected in the total ion chromatogram (TIC) and quantified using the selective ion monitoring mode (SIM) at m/z = 128. Internal standards ([Biphenyl] = 1 mM for cyclized product **2e**) and ([**2e**] = 1 mM for cyclized products **2f** and **2g**) were used for the calibration curves and to determine the yield of the reaction, Supplementary Fig. 12.

# Supplementary Information

## 1.3. Synthesis of the metathesis cofactor Ru1

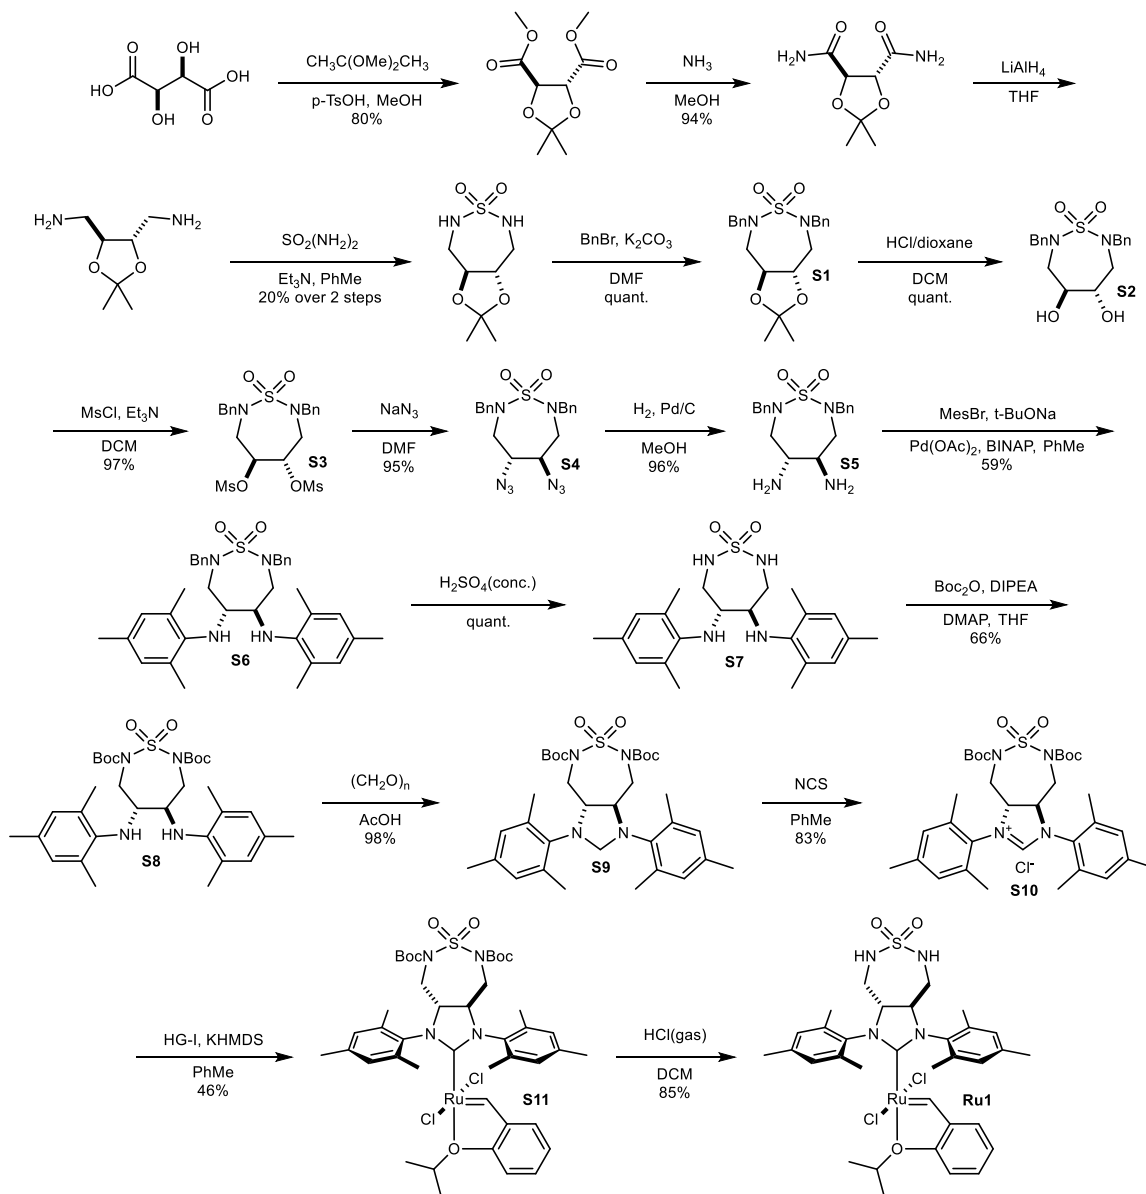

## Supplementary Information

### **(3a*S*,8a*S*)-5,7-Dibenzyl-2,2-dimethylhexahydro-[1,3]dioxolo[4,5-*d*] [1,2,7]thiadiazepine 6,6-dioxide (S1)**

(3a*S*,8a*S*)-5,7-Dibenzyl-2,2-dimethylhexahydro-[1,3]dioxolo[4,5-*d*][1,2,7]thiadiazepine 6,6-dioxide **S1** was synthesized according to a described protocol<sup>4</sup>.

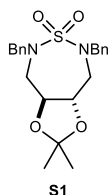

<sup>1</sup>H NMR (500 MHz, CDCl<sub>3</sub>) δ 7.40 – 7.28 (m, 10H), 4.47 (d, *J* = 14.5 Hz, 2H), 4.36 (d, *J* = 14.5 Hz, 2H), 4.25 – 4.12 (m, 2H), 3.44 (dd, *J* = 12.9, 4.2 Hz, 2H), 3.05 – 2.94 (m, 2H), 1.35 (s, 6H).

HRMS (ESI positive mode, *m/z*): calculated for C<sub>21</sub>H<sub>27</sub>N<sub>2</sub>O<sub>4</sub>S [M+H]<sup>+</sup> 403.1683; found 403.1683.

### **(4*S*,5*S*)-2,7-Dibenzyl-4,5-dihydroxy-1,2,7-thiadiazepane 1,1-dioxide (S2)**

(4*S*,5*S*)-2,7-Dibenzyl-4,5-dihydroxy-1,2,7-thiadiazepane 1,1-dioxide **S2** was synthesized according to a described protocol<sup>4</sup>.

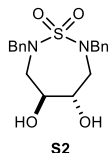

<sup>1</sup>H NMR (500 MHz, CDCl<sub>3</sub>) δ 7.47 – 7.28 (m, 10H), 4.65 (d, *J* = 15.3 Hz, 2H), 4.46 (d, *J* = 15.3 Hz, 2H), 3.58 – 3.45 (m, 2H), 3.38 (dd, *J* = 15.1, 8.8 Hz, 2H), 3.16 (dd, *J* = 15.1, 2.6 Hz, 2H), 2.08 (d, *J* = 3.7 Hz, 2H).

### **(4*S*,5*S*)-2,7-Dibenzyl-1,1-dioxido-1,2,7-thiadiazepane-4,5-diyl dimethanesulfonate (S3)**

The crude diol **S2** (7.25 g, 20 mmol) was dissolved in anhydrous dichloromethane (150 mL). Triethylamine (11.05 mL, 80 mmol) was added dropwise, followed by methanesulfonyl chloride (3.5 mL, 45 mmol) which was also added dropwise to the reaction mixture at 0 °C. After completion of the addition, the mixture was stirred at room temperature for 12 h. Then, the mixture was washed with water, saturated sodium bicarbonate and saturated brine, dried over anhydrous sodium sulfate, and filtered. The volatiles were removed under reduced pressure to give (4*S*,5*S*)-2,7-dibenzyl-1,1-dioxido-1,2,7-thiadiazepane-4,5-diyl dimethanesulfonate **S3** as a yellow foam (10.05 g, 97%).

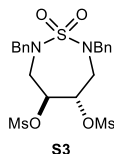

<sup>1</sup>H NMR (500 MHz, CDCl<sub>3</sub>) δ 7.47 – 7.33 (m, 10H), 4.59 (d, *J* = 15.1 Hz, 2H), 4.52 (d, *J* = 15.1 Hz, 2H), 4.48 – 4.39 (m, 2H), 3.61 (dd, *J* = 15.5, 9.4 Hz, 2H), 3.43 (dd, *J* = 15.6, 3.0 Hz, 2H), 2.92 (s, 6H).

## Supplementary Information

$^{13}\text{C}$  NMR (126 MHz,  $\text{CDCl}_3$ )  $\delta$  135.53, 129.24, 129.00, 128.70, 76.22, 52.85, 46.38, 38.65.

HRMS (ESI positive mode,  $m/z$ ): calculated for  $\text{C}_{20}\text{H}_{27}\text{N}_2\text{O}_8\text{S}_3$   $[\text{M}+\text{H}]^+$  519.0918; found 519.0924.

### (4*R*,5*R*)-4,5-Diazido-2,7-dibenzyl-1,2,7-thiadiazepane 1,1-dioxide (**S4**)

The bis-mesylate **S3** (5 g, 9.6 mmol) was dissolved in *N,N*-dimethylformamide (80 mL), then sodium azide (2.5 g, 38.5 mmol) was added, the reaction mixture was heated to 80 °C and stirred for 16 h. Then, water (200 mL) was added, the mixture was extracted with ethyl acetate (150 mL $\times$ 3), and the combined organic phase was washed with water (200 mL $\times$ 2) and saturated brine (200 mL) successively. It was then dried over anhydrous sodium sulfate, filtered, and the organic solvents were removed under reduced pressure. The crude product was purified by silica gel column chromatography (3-5% EtOAc in cyclohexane) to afford (4*R*,5*R*)-4,5-diazido-2,7-dibenzyl-1,2,7-thiadiazepane 1,1-dioxide **S4** as a pale-yellow oil (3.76 g, 95%).

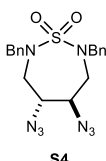

$^1\text{H}$  NMR (500 MHz,  $\text{CDCl}_3$ )  $\delta$  7.45 – 7.33 (m, 10H), 4.56 (d,  $J$  = 15.0 Hz, 2H), 4.51 (d,  $J$  = 15.0 Hz, 2H), 3.47 (dt,  $J$  = 16.3, 8.2 Hz, 2H), 3.10 (dd,  $J$  = 15.5, 2.7 Hz, 2H), 3.00 – 2.92 (m, 2H).

$^{13}\text{C}$  NMR (126 MHz,  $\text{CDCl}_3$ )  $\delta$  135.73, 129.32, 128.74, 128.72, 62.76, 52.68, 46.95.

HRMS (ESI positive mode,  $m/z$ ): calculated for  $\text{C}_{18}\text{H}_{20}\text{N}_8\text{NaO}_2\text{S}$   $[\text{M}+\text{Na}]^+$  435.1315; found 435.1322.

### (4*R*,5*R*)-4,5-Diamino-2,7-dibenzyl-1,2,7-thiadiazepane 1,1-dioxide (**S5**)

A solution containing the diazide **S4** (4.5 g, 10.9 mmol) in methanol (50 mL) was added to a stirred suspension of 10% Pd on charcoal (1.65 g, 0.14 eq.) in methanol (100 mL). The mixture was hydrogenated at atmospheric pressure and room temperature for 6 h. The catalyst was removed by filtration and washed with methanol. The solvent was removed under reduced pressure to afford (4*R*,5*R*)-4,5-diamino-2,7-dibenzyl-1,2,7-thiadiazepane 1,1-dioxide **S5** as a colourless oil (3.76 g, 96%) and used without further purification for the next step.

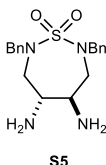

$^1\text{H}$  NMR (500 MHz,  $\text{CDCl}_3$ )  $\delta$  7.44 – 7.29 (m, 10H), 4.73 (d,  $J$  = 15.5 Hz, 2H), 4.37 (d,  $J$  = 15.5 Hz, 2H), 3.45 – 3.23 (m, 2H), 2.87 (dd,  $J$  = 15.3, 2.6 Hz, 2H), 2.52 – 2.31 (m, 2H).

$^{13}\text{C}$  NMR (126 MHz,  $\text{CDCl}_3$ )  $\delta$  136.77, 128.98, 128.29, 128.07, 55.41, 52.50, 50.88.

HRMS (ESI positive mode,  $m/z$ ): calculated for  $\text{C}_{18}\text{H}_{25}\text{N}_4\text{O}_2\text{S}$   $[\text{M}+\text{H}]^+$  361.1689; found 361.1693.

### (4*R*,5*R*)-2,7-Dibenzyl-4,5-bis(mesitylamino)-1,2,7-thiadiazepane 1,1-dioxide (**S6**)

## Supplementary Information

Under an inert atmosphere, tris(dibenzylideneacetone) dipalladium (0) (1.40 g, 1.5 mmol), BINAP (1.86 g, 3 mmol), and sodium *t*-butoxide (4.20 g, 43.7 mmol) were added to toluene (300 mL) and stirred for 20 min. The diamine **S5** (3.61 g, 10 mmol) and 2-bromomesitylene (7.96 g, 40 mmol) were then added and the solution was heated at 100 °C for 16 h. The solution was then cooled to room temperature and concentrated under reduced pressure. The residue was purified by silica gel column chromatography (10% EtOAc in cyclohexane) to afford (4*R*,5*R*)-2,7-dibenzyl-4,5-bis(mesitylamino)-1,2,7-thiadiazepane 1,1-dioxide **S6** as a white foam (3.53 g, 59%).

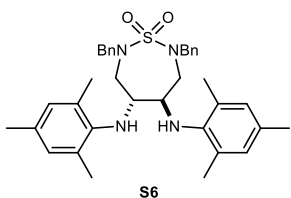

<sup>1</sup>H NMR (500 MHz, CDCl<sub>3</sub>) δ 7.28 – 7.24 (m, 2H), 7.23 – 7.17 (m, 4H), 7.02 – 6.96 (m, 4H), 6.80 (s, 4H), 4.33 (d, *J* = 14.6 Hz, 2H), 4.24 (d, *J* = 14.6 Hz, 2H), 3.38 (dd, *J* = 14.9, 9.7 Hz, 2H), 3.03 (s, 2H), 2.88 – 2.74 (m, 4H), 2.29 (s, 6H), 2.07 (s, 12H).

<sup>13</sup>C NMR (126 MHz, CDCl<sub>3</sub>) δ 139.73, 136.41, 133.12, 132.42, 129.80, 129.03, 128.77, 127.97, 60.22, 52.43, 47.26, 27.05, 20.79, 18.80.

HRMS (ESI positive mode, *m/z*): calculated for C<sub>36</sub>H<sub>45</sub>N<sub>4</sub>O<sub>2</sub>S [M+H]<sup>+</sup> 597.3269; found 597.3258.

### (4*R*,5*R*)-4,5-Bis(mesitylamino)-1,2,7-thiadiazepane 1,1-dioxide (**S7**)

The benzyl-protected sulfamide **S6** (3.53 g, 5.9 mmol) was crushed and mixed with concentrated H<sub>2</sub>SO<sub>4</sub> (40 mL). The reaction mixture was vigorously stirred for 1 h and then crushed ice (200 g) was added at 0 °C. Then, [NaOH] = 2 mM was added dropwise to reach pH=8. The mixture was extracted with DCM (100 mL×6), and the organic phase was washed with water (100 mL) and saturated brine (200 mL) successively, dried over anhydrous sodium sulfate, and filtered. The organic solvent was removed under reduced pressure to afford (4*R*,5*R*)-4,5-bis(mesitylamino)-1,2,7-thiadiazepane 1,1-dioxide **S7** as an off-white solid (2.43 g, quant.). The crude product was used in the next step without further purification.

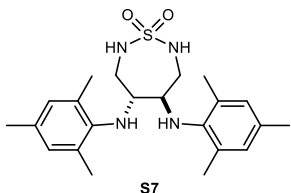

<sup>1</sup>H NMR (500 MHz, Acetone-*d*<sub>6</sub>) δ 6.75 (s, 4H), 6.30 (t, *J* = 5.2 Hz, 2H), 3.88 (d, *J* = 8.0 Hz, 2H), 3.44 (dd, *J* = 12.8, 6.0 Hz, 2H), 3.31 – 3.18 (m, 4H), 2.17 (s, 6H), 2.12 (s, 12H).

<sup>13</sup>C NMR (126 MHz, Acetone-*d*<sub>6</sub>) δ 141.97, 141.93, 131.95, 131.28, 131.19, 130.30, 60.87, 60.77, 43.06, 42.97, 20.60, 19.03, 19.02.

HRMS (ESI positive mode, *m/z*): calculated for C<sub>22</sub>H<sub>33</sub>N<sub>4</sub>O<sub>2</sub>S [M+H]<sup>+</sup> 417.2326; found 417.2319.

**Di-*tert*-butyl (4*R*,5*R*)-4,5-bis(mesitylamino)-1,2,7-thiadiazepane-2,7-dicarboxylate 1,1-dioxide (**S8**)**



## Supplementary Information

The deprotected sulfamide **S7** (2.43 g, 5.9 mmol), Et<sub>3</sub>N (5.0 mL, 36 mmol), and DMAP (216 mg, 1.77 mmol) were dissolved in chloroform (250 mL) and cooled to 0 °C. Then, Boc<sub>2</sub>O (3.86 g, 17.7 mmol) was added portionwise, and the resulting mixture was stirred at 0 °C for 30 min, and then at room temperature for 3 h. The reaction mixture was concentrated under reduced pressure and purified by silica gel column chromatography (15% EtOAc in cyclohexane) to afford di-*tert*-butyl (4*R*,5*R*)-4,5-bis(mesitylamino)-1,2,7-thiadiazepane-2,7-dicarboxylate 1,1-dioxide **S8** as a white foam (2.4 g, 66%).

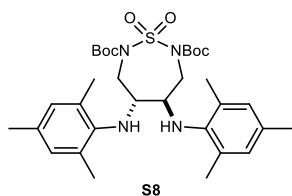

<sup>1</sup>H NMR (500 MHz, CDCl<sub>3</sub>) δ 6.82 (s, 4H), 4.00 (dd, *J* = 15.1, 1.9 Hz, 2H), 3.73 – 3.67 (m, 2H), 3.48 (s, 2H), 3.42 – 3.31 (m, 2H), 2.23 (s, 18H), 1.39 (s, 18H).

<sup>13</sup>C NMR (126 MHz, CDCl<sub>3</sub>) δ 150.32, 139.68, 132.99, 131.84, 129.95, 85.28, 60.40, 48.24, 27.85, 20.69, 19.05.

HRMS (ESI positive mode, *m/z*): calculated for C<sub>32</sub>H<sub>49</sub>N<sub>4</sub>O<sub>6</sub>S [M+H]<sup>+</sup> 617.3370; found 617.3367.

### Di-*tert*-butyl (3*aR*,8*aR*)-1,3-dimesitylhexahydro-1*H*-imidazo[4,5-*d*][1,2,7]thiadiazepine-5,7-dicarboxylate 6,6-dioxide (**S9**)

The diamine **S8** (2.4 g, 3.9 mmol) was dissolved in acetic acid (100 mL), and paraformaldehyde (0.40 g, 13.3 mmol) was added. The reaction was stirred until the paraformaldehyde had dissolved. Then, the acetic acid was removed under reduced pressure and the resulting crude material was purified by column chromatography (10% EtOAc in cyclohexane) to give di-*tert*-butyl (3*aR*,8*aR*)-1,3-dimesitylhexahydro-1*H*-imidazo[4,5-*d*][1,2,7]thiadiazepine-5,7-dicarboxylate 6,6-dioxide **S9** as a white foam (2.41 g, 98%).

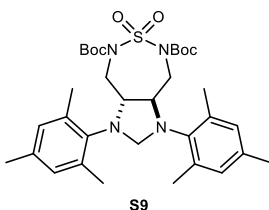

<sup>1</sup>H NMR (500 MHz, CDCl<sub>3</sub>) δ 6.88 (s, 2H), 6.84 (s, 2H), 4.38 (s, 2H), 4.11 – 4.03 (m, 2H), 3.82 (dd, *J* = 14.0, 2.8 Hz, 2H), 3.61 (dt, *J* = 14.0, 7.3 Hz, 2H), 2.40 (s, 6H), 2.33 (s, 6H), 2.25 (s, 6H), 1.43 (s, 18H).

<sup>13</sup>C NMR (126 MHz, CDCl<sub>3</sub>) δ 150.78, 139.84, 137.35, 137.24, 136.48, 130.98, 129.32, 84.77, 70.94, 66.32, 48.69, 27.92, 27.06, 20.92, 19.16, 19.16.

HRMS (ESI positive mode, *m/z*): calculated for C<sub>33</sub>H<sub>49</sub>N<sub>4</sub>O<sub>6</sub>S [M+H]<sup>+</sup> 629.3358; found 629.3367.

## Supplementary Information

### **(3*aR*,8*aR*)-5,7-Bis(*tert*-butoxycarbonyl)-1,3-dimesityl-3*a*,4,5,7,8,8*a*-hexahydro-1*H*-imidazo[4,5-*d*][1,2,7]thiadiazepin-3-ium 6,6-dioxide chloride (**S10**).**

The imidazolidine **S9** (200 mg, 0.32 mmol) was dissolved in toluene (20 mL). N-chlorosuccinimide (45 mg, 0.34 mmol) was added, and the reaction mixture was stirred at room temperature for 5 h (depending on the quality of NCS, the stirring may be extended to ensure full conversion). After completion, toluene was removed under reduced pressure and the resulting foam was dissolved in a minimal amount of DCM. This solution was added dropwise to vigorously a stirred mixture of hexane (20 mL) and diethyl ether (20 mL) to separate product from succinimide. The solids were collected by vacuum filtration, washed with an hexane-ether mixture, and dried under vacuum to afford (3*aR*,8*aR*)-5,7-bis(*tert*-butoxycarbonyl)-1,3-dimesityl-3*a*,4,5,7,8,8*a*-hexahydro-1*H*-imidazo[4,5-*d*][1,2,7]thiadiazepin-3-ium 6,6-dioxide chloride **S10** as a white powder (176 mg, 83%).

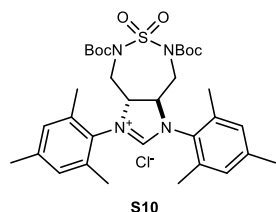

<sup>1</sup>H NMR (500 MHz, CDCl<sub>3</sub>) δ 10.92 (s, 1H), 7.01 (s, 2H), 6.98 (s, 2H), 4.81 (s, 2H), 4.01 (d, *J* = 14.1 Hz, 2H), 3.97 – 3.89 (m, 2H), 2.46 (s, 6H), 2.37 (s, 6H), 2.29 (s, 6H), 1.46 (s, 18H).

<sup>13</sup>C NMR (126 MHz, CDCl<sub>3</sub>) δ 162.07, 149.87, 141.45, 135.98, 134.72, 130.95, 130.68, 127.82, 87.02, 67.73, 45.09, 27.84, 21.20, 19.42, 18.60.

HRMS (ESI positive mode, *m/z*): calculated for C<sub>33</sub>H<sub>47</sub>N<sub>4</sub>O<sub>6</sub>S [M-Cl]<sup>+</sup> 627.3218; found 627.3211.

### **Dichloro((3*aR*,8*aR*)-5,7-bis(*tert*-butoxycarbonyl)-1,3-dimesityl-6,6-dioxidoctahydro-2*H*-imidazo[4,5-*d*][1,2,7]thiadiazepin-2-ylidene)(2-isopropoxybenzylidene)ruthenium(II) (**S11**).**

The dihydroimidazolium salt **S10** (40 mg, 0.06 mmol), KHMDs (24 mg, 0.12 mmol), and the Hoveyda-Grubbs 1<sup>st</sup> generation catalyst (72 mg, 0.12 mmol) were suspended in dry and degassed toluene (10 mL). The reaction mixture was heated to 80 °C for 5 h. The solvent was evaporated and the crude material was purified by column chromatography (10% EtOAc in cyclohexane) to afford dichloro((3*aR*,8*aR*)-5,7-bis(*tert*-butoxycarbonyl)-1,3-dimesityl-6,6-dioxidoctahydro-2*H*-

## Supplementary Information

imidazo[4,5-*d*][1,2,7]thiadiazepin-2-ylidene)(2-isopropoxybenzylidene)ruthenium(II) **S11** as a green solid (26 mg, 46%).

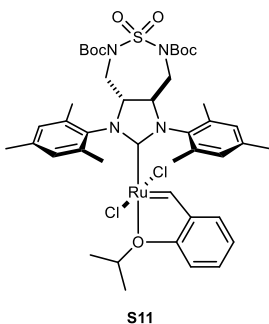

$^1\text{H}$  NMR (500 MHz,  $\text{CD}_2\text{Cl}_2$ )  $\delta$  16.20 (d,  $J$  = 0.8 Hz, 1H), 7.56 (dt,  $J$  = 8.4, 4.5 Hz, 1H), 7.13 (s, 2H), 7.08 (s, 2H), 6.92 (d,  $J$  = 4.3 Hz, 2H), 6.85 (d,  $J$  = 8.3 Hz, 1H), 4.89 (hept,  $J$  = 6.1 Hz, 1H), 4.71 (brs, 2H), 4.09 – 3.77 (m, 4H), 2.42 (brs, 18H), 1.43 (s, 18H), 1.20 (dd,  $J$  = 6.1, 3.0 Hz, 6H).

HRMS (ESI positive mode,  $m/z$ ): calculated for  $\text{C}_{43}\text{H}_{58}\text{N}_4\text{O}_7\text{RuS}$   $[\text{M}-2\text{Cl}]^{2+}$  438.1536; found 438.1535.

### Dichloro((3*aR*,8*aR*)-1,3-dimesityl-6,6-dioxidooctahydro-2*H*-imidazo[4,5-*d*][1,2,7]thiadiazepin-2-ylidene)(2-isopropoxybenzylidene)ruthenium(II) (**Ru1**).

The boc-protected sulfamide **S11** (26 mg, 0.027 mmol) was dissolved in  $\text{CH}_2\text{Cl}_2$  (5 mL) in a Schlenk tube, and HCl gas was purged through the solution for 3 h at room temperature. Gaseous HCl was generated by dropwise addition of concentrated  $\text{H}_2\text{SO}_4$  to  $\text{NH}_4\text{Cl}$ . The solution was stirred for an additional 1 h at room temperature. Upon completion of the reaction as revealed by TLC (30% EtOAc in cyclohexane), the solvent was evaporated under reduced pressure, and the crude material was purified by column chromatography (30% EtOAc in cyclohexane) to afford dichloro((3*aR*,8*aR*)-1,3-dimesityl-6,6-dioxidooctahydro-2*H*-imidazo[4,5-*d*][1,2,7]thiadiazepin-2-ylidene)(2-isopropoxybenzylidene)ruthenium(II) **Ru1** as a green solid (17.4 mg, 85%).

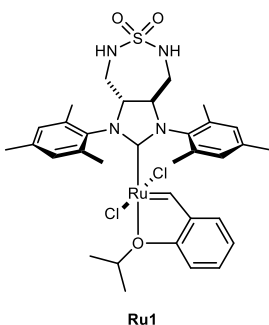

$^1\text{H}$  NMR (500 MHz,  $\text{CD}_2\text{Cl}_2$ )  $\delta$  16.23 (d,  $J$  = 0.8 Hz, 1H), 7.56 (ddd,  $J$  = 8.4, 5.4, 3.6 Hz, 1H), 7.11 (s, 2H), 7.08 (s, 2H), 6.95 – 6.87 (m, 2H), 6.84 (d,  $J$  = 8.3 Hz, 1H), 4.94 – 4.76 (m, 3H), 4.60 (t,  $J$  = 5.6 Hz, 2H), 3.32 (s, 4H), 2.41 (s, 18H), 1.19 (dd,  $J$  = 6.1, 3.5 Hz, 6H).

$^{13}\text{C}$  NMR (126 MHz,  $\text{CD}_2\text{Cl}_2$ )  $\delta$  218.50, 152.54, 145.46, 139.98, 130.45, 130.07, 122.86, 122.73, 113.43, 75.80, 43.96, 21.25, 21.21, 18.03.

## Supplementary Information

HRMS (ESI positive mode,  $m/z$ ): calculated for  $C_{33}H_{42}N_4O_3RuS$   $[M-2Cl]^{2+}$  338.1009; found 338.1009. for  $C_{33}H_{42}ClN_4O_3RuS$   $[M-Cl]^+$  711.1716; found 711.1709.

### 1.4. Synthesis of ring-closing metathesis substrates and products

Substrates **1a**<sup>5</sup>, **1c**<sup>6-8</sup>, **1f**<sup>2</sup>, and **1g**<sup>2</sup> were synthesized following reported procedures. The diene **1d** was purchased from Sigma Aldrich.

Diene **1a** was prepared according to the general procedure<sup>5</sup>. 94% yield. <sup>1</sup>H NMR (500 MHz,  $CDCl_3$ )  $\delta$  7.70 (d,  $J$  = 8.2 Hz, 2H), 7.29 (d,  $J$  = 8.0 Hz, 2H), 5.61 (ddt,  $J$  = 16.2, 9.7, 6.3 Hz, 2H), 5.14 (ddt,  $J$  = 13.8, 2.7, 1.5 Hz, 4H), 3.80 (dd,  $J$  = 6.3, 1.5 Hz, 4H), 2.43 (s, 3H).

Diene **1c** was synthesized according to the reported procedure<sup>6-8</sup>. 32% yield over three steps. <sup>1</sup>H NMR (500 MHz,  $CDCl_3$ )  $\delta$  7.70 (d,  $J$  = 7.5 Hz, 2H), 7.26 (d,  $J$  = 7.5 Hz, 1H), 5.77 (dddt,  $J$  = 17.5, 10.2, 6.2, 1.3 Hz, 2H), 5.23 – 5.00 (m, 3H), 4.96 (ddt,  $J$  = 6.0, 4.5, 1.4 Hz, 0H), 3.79 (dq,  $J$  = 6.3, 1.3 Hz, 1H), 2.41 (s, 2H).

Diene **1f** was prepared following the reported procedure<sup>2</sup>. 94% yield. <sup>1</sup>H NMR (500 MHz,  $CDCl_3$ )  $\delta$  5.66 (ddt,  $J$  = 17.0, 10.3, 7.4 Hz, 2H), 5.15 – 5.03 (m, 4H), 4.18 (q,  $J$  = 7.1 Hz, 4H), 2.64 (dt,  $J$  = 7.3, 1.2 Hz, 4H), 1.24 (t,  $J$  = 7.1 Hz, 6H).

Substrate **1g** was prepared following the reported procedure<sup>2</sup>. 60% yield. <sup>1</sup>H NMR (500 MHz,  $CDCl_3$ )  $\delta$  7.62 – 7.55 (m, 4H), 7.35 – 7.29 (m, 4H), 7.28 – 7.23 (m, 2H), 6.00 (ddt,  $J$  = 17.2, 10.4, 5.2 Hz, 1H), 5.37 (dq,  $J$  = 17.2, 1.8 Hz, 1H), 5.17 (dq,  $J$  = 10.5, 1.5 Hz, 1H), 4.04 (dt,  $J$  = 5.2, 1.6 Hz, 2H), 2.89 (s, 1H).

Substrate **1e** was prepared according to the following scheme:

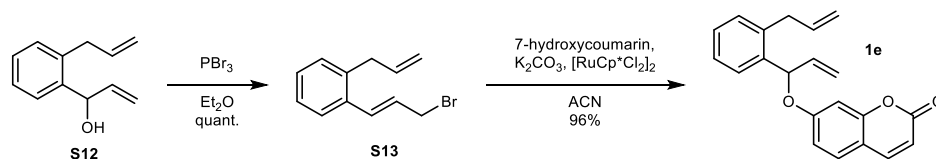

1-(2-Allylphenyl)prop-2-en-1-ol **S12** was obtained according to a reported procedure<sup>3</sup>. <sup>1</sup>H NMR (500 MHz,  $CDCl_3$ )  $\delta$  7.56 – 7.43 (m, 1H), 7.33 – 7.21 (m, 2H), 7.21 – 7.13 (m, 1H), 6.17 – 5.92 (m, 2H), 5.47 (td,  $J$  = 5.4, 4.7, 1.8 Hz, 1H), 5.35 (dt,  $J$  = 17.2, 1.5 Hz, 1H), 5.22 (dt,  $J$  = 10.4, 1.5 Hz, 1H), 5.09 (dq,  $J$  = 10.1, 1.6 Hz, 1H), 5.00 (dq,  $J$  = 17.1, 1.8 Hz, 1H), 3.50 (d,  $J$  = 6.2 Hz, 2H), 1.88 (d,  $J$  = 4.0 Hz, 1H).

To a stirred solution of the alcohol **S12** (174 mg, 1 mmol) in diethyl ether (2.5 mL), a solution of  $PBr_3$  (135 mg, 0.5 mmol) in diethyl ether (1 mL) was added dropwise at 0 °C. The reaction mixture was stirred for 1 h, after which, a saturated solution of  $NaHCO_3$  (1 mL) was added. The organic phase was separated, washed with brine (2 mL), dried over anhydrous sodium sulfate, and filtered. The organic solvent was removed under reduced pressure to afford (E)-1-allyl-2-(3-

## Supplementary Information

bromoprop-1-en-1-yl)benzene **S13** as a pale-yellow oil (237 mg, quant.). <sup>1</sup>H NMR (500 MHz, CDCl<sub>3</sub>) δ 7.53 – 7.43 (m, 1H), 7.24 – 7.12 (m, 3H), 6.88 (d, *J* = 15.4 Hz, 1H), 6.29 (dt, *J* = 15.4, 7.8 Hz, 1H), 5.95 (ddt, *J* = 16.3, 10.1, 6.2 Hz, 1H), 5.08 (dt, *J* = 10.1, 1.6 Hz, 1H), 4.97 (dq, *J* = 17.1, 1.7 Hz, 1H), 4.17 (dd, *J* = 7.8, 0.9 Hz, 2H), 3.45 (d, *J* = 6.1 Hz, 2H).

The bromide **S13** (237 mg, 1 mmol), 7-hydroxy-2*H*-chromen-2-one (243 mg, 1.5 mmol), [RuCp\*Cl<sub>2</sub>]<sub>2</sub> (60 mg, 0.1 mmol), and K<sub>2</sub>CO<sub>3</sub> (350 mg, 2.5 mmol) were suspended in dry and degassed ACN (10 mL) and stirred for 3 h. The reaction mixture was centrifuged, and the supernatant was concentrated under reduced pressure. The residue was purified by silica gel column chromatography (10% EtOAc in cyclohexane) to afford 7-((1-(2-allylphenyl)allyl)oxy)-2*H*-chromen-2-one (**1e**) as a white solid (306 mg, 96%). <sup>1</sup>H NMR (500 MHz, CDCl<sub>3</sub>) δ 7.60 (d, *J* = 9.5 Hz, 1H), 7.44 (d, *J* = 7.8 Hz, 1H), 7.32 (d, *J* = 8.6 Hz, 1H), 7.30 – 7.21 (m, 3H), 6.87 (dd, *J* = 8.6, 2.4 Hz, 1H), 6.79 (d, *J* = 2.3 Hz, 1H), 6.23 (d, *J* = 9.5 Hz, 1H), 6.11 (ddd, *J* = 16.4, 10.5, 5.5 Hz, 1H), 5.99 (ddt, *J* = 16.6, 10.1, 6.3 Hz, 1H), 5.93 (d, *J* = 5.5 Hz, 1H), 5.38 – 5.26 (m, 2H), 5.21 – 5.13 (m, 1H), 5.06 (dd, *J* = 17.1, 1.6 Hz, 1H), 3.69 – 3.37 (m, 2H).

The products for **1a**, **1c**, **1d**, **1f**, and **1g** were synthesized following a reported procedure<sup>9</sup>.

The Hoveyda-Grubbs II catalyst (1 mol %) was added at room temperature to a solution of diene substrates **1a–1f**, or enyne **1g** (1.0 equiv.) in CH<sub>2</sub>Cl<sub>2</sub> (3 mL). The reaction mixture was stirred for 1 h at 40 °C and then concentrated under reduced pressure. The residue was purified by flash column chromatography to afford the RCM product.

Metathesis product of **1a**: 99% yield. <sup>1</sup>H NMR (500 MHz, CDCl<sub>3</sub>) δ 7.72 (d, *J* = 8.3 Hz, 2H), 7.32 (d, *J* = 8.3 Hz, 2H), 5.65 (s, 2H), 4.12 (s, 4H), 2.43 (s, 3H).

Metathesis product of **1c**: 98% yield. <sup>1</sup>H NMR (500 MHz, CDCl<sub>3</sub>) δ 7.74 (d, *J* = 8.3 Hz, 2H), 7.32 (d, *J* = 8.3 Hz, 2H), 5.82 (ddd, *J* = 17.1, 10.1, 7.0 Hz, 1H), 5.72 – 5.68 (m, 1H), 5.59 – 5.50 (m, 1H), 5.31 (dt, *J* = 17.1, 1.2 Hz, 1H), 5.16 (dt, *J* = 10.1, 1.1 Hz, 1H), 4.19 (q, *J* = 2.3 Hz, 2H), 2.44 (s, 3H).

Metathesis product of **1d**: Quant. <sup>1</sup>H NMR (500 MHz, CDCl<sub>3</sub>) δ 7.31 (d, *J* = 8.5 Hz, 2H), 7.09 (dd, *J* = 8.5, 0.8 Hz, 2H), 6.07 (s, 1H), 5.97 (s, 2H), 4.27 (s, 4H), 2.30 (s, 3H).

Metathesis product of **1f**: Quant. <sup>1</sup>H NMR (500 MHz, CDCl<sub>3</sub>) δ 5.61 (s, 2H), 4.20 (q, *J* = 7.1 Hz, 4H), 3.01 (s, 4H), 1.25 (t, *J* = 7.1 Hz, 6H).

Metathesis product of **1g**: Quant. <sup>1</sup>H NMR (500 MHz, CDCl<sub>3</sub>) δ 7.42 – 7.25 (m, 10H), 6.31 – 6.03 (m, 2H), 5.41 – 5.27 (m, 1H), 5.11 (dq, *J* = 11.1, 1.0 Hz, 1H), 4.80 (dq, *J* = 2.0, 1.0 Hz, 2H).

## Supplementary Information

### 1.5. Computational design of Ru1-dnTRP

#### *Binding site motif generation and docking*

Three-dimensional structures of **Ru1**, used for binding site design, were computed by DFT. All calculations were performed using Gaussian 16 software<sup>10</sup>. Structural optimization and frequency calculations were performed with the B3LYP-D3 method along with 6-31G(d) basis set and the SDD ECP on the Ru atom. D3 dispersion correction was applied using the Becke-Johnson damping function<sup>11</sup>. The solvent effect of water was included using the CPCM solvation model during geometry optimization. Vibration frequency calculations were performed to confirm that the computed structure indeed corresponds to a minimum.

We considered 8 conformers of the 7-membered sulfonamide ring, based on the orientation of the SO<sub>2</sub> moiety and the NH groups (Supplementary Scheme 1). Additional conformational freedom was considered by sampling the rotation of the *i*Pr-O bond in three steps.

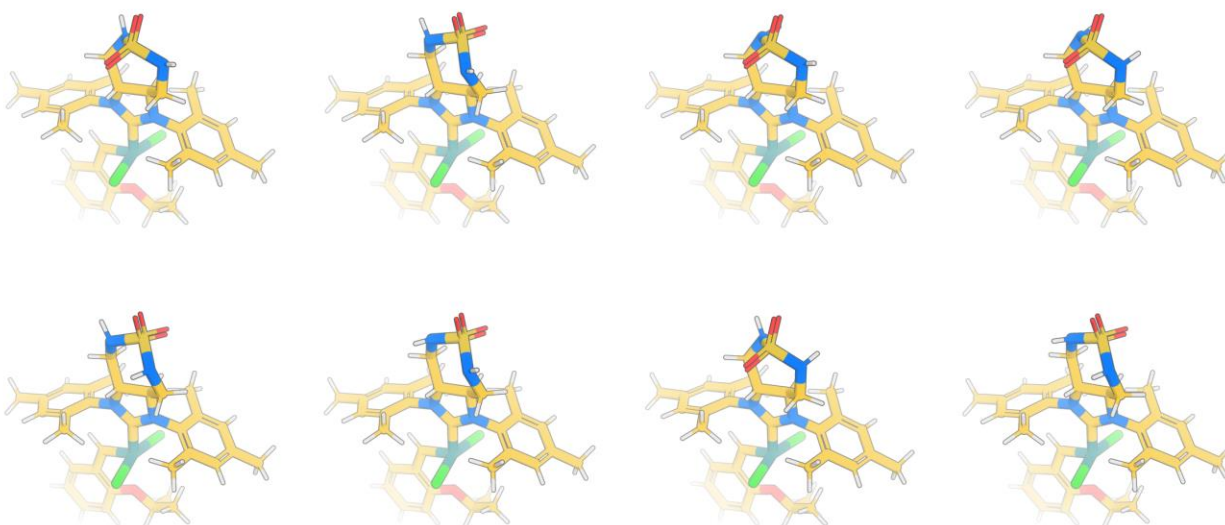

**Supplementary Scheme 1.** Conformers of **Ru1** reflecting the flexibility of the sulfamide ring.

A Rosetta ligand parameters file was created from the computed conformers by first converting the Gaussian outputs to mol2 files using Open Babel<sup>12</sup>, and thereafter converting the mol2 file to Rosetta ligand parameters file using the \$ROSETTA\_MAIN/source/scripts/python/public/molfile\_to\_params.py script provided in Rosetta. Separate parameter files were further prepared for each sulfamide conformer to use them as unique inputs in the RifGen and RifDock steps.

We used RifGen<sup>13</sup> to identify beneficial interaction geometries between the ligand and amino acid side chains. In its essence, RifGen samples the placement of amino acid side chains against different parts of the molecule, and stores information about beneficial and valid inverse rotamers (backbone positions if side chain is fixed). We used RifGen to produce individual sets of inverse rotamers for each of the conformers of **Ru1**.

## Supplementary Information

RifGen command: `14/rifdock/latest/rifgen @rifgen.flag`

The RifGen control file `rifgen.flag` is available for download at Zenodo<sup>15</sup>.

Next, we used RifDock<sup>13</sup> to identify combinations of inverse rotamers that would yield the best interaction energies and could be placed onto the provided protein backbones. We used parametrically-generated toroidal repeat protein (TRP) backbones as input scaffolds for RifDock, and to increase the diversity, relaxed the crystal structure of published TRP (PDB id: 4YXX)<sup>16</sup> using Rosetta FastRelax in multiple trajectories.

For each input scaffold, allowed pocket positions of TRP were enumerated (in file `positions.pos`): 4, 7, 8, 11, 12, 15, 39, 42, 43, 46, 47, 50, 74, 77, 78, 81, 82, 85, 109, 112, 113, 116, 117, 120, 144, 147, 148, 151, 152, 155, 179, 182, 183, 186, 187, 190.

The fifty best-scoring docks were saved for each scaffold and **Ru1** conformer combination.

RifDock command:

```
{RIF_PATH}/rifdock/latest/rif_dock_test @/ rifdock.flag -rif_dock:scaffolds  
scaffold.pdb -rif_dock:scaffold_res positions.pos -rif_dock:outdir {outdir}
```

The RifDock control file `rifdock.flag` is available for download at Zenodo<sup>15</sup>.

### ***Ligand binding site design***

After having placed the cofactor **Ru1** and its interacting sidechains into the TRP scaffold with RifDock, the rest of the protein sequence was optimized to create additional interactions with the ligand and to further stabilize the interacting residues, Supplementary Fig. 1. Rosetta FastDesign<sup>17</sup> was used to perform the sequence design, and it was applied in two iterations. In iteration, design was performed while applying distance constraints between any hydrogen bond donors and acceptors of the ligand and sidechains that got introduced by RifDock. In the second stage, these constraints were relaxed and the sequence was further refined with FastDesign. The designed structures were thereafter scored for metrics describing the protein-ligand interactions (interface energy, ligand SASA, shape complementarity, number of polar contacts, substrate SASA, orientation of the cofactor **Ru1**) and pocket features (no-ligand-repack RMSD of interacting residues).

```
python/scripts/post_rifdock_FastDesign.py --pdb input.pdb --nstruct 5 --repack --  
min_polar 2 --outdir {outdir} --params {PATH}/ligand/HGS.params --ramp_cst_weights 10.0  
0.0 --no_ala_design
```

The designs were selected based on the following metrics:

| Metric                                        | Threshold |
|-----------------------------------------------|-----------|
| Ligand – H-bond partner constraint score      | <= 8.0    |
| Mean no-ligand-repack RMSD of RIF residues    | <= 0.6    |
| Max no-ligand-repack RMSD of RIF residues     | <= 1.0    |
| Shape complementarity                         | >= 0.6    |
| Ligand relative SASA (SASA_bound / SASA_free) | <= 0.2    |
| Number of polar contacts to the ligand        | >= 3.0    |

## Supplementary Information

|                                                                         |                           |
|-------------------------------------------------------------------------|---------------------------|
| Number of H-bond acceptors near ligand NH                               | $\geq 1.0$                |
| Rosetta total score per residue                                         | $\leq -3.0$               |
| Ligand interface energy                                                 | $< 50\%$ (below median)   |
| Substrate SASA (of the <i>i</i> PrO-Ph moiety)                          | $\geq 30.0$               |
| Angle between ligand long axis and the toroid pore (ligand orientation) | $\geq 30.0$ & $\leq 40.0$ |

The designs passing the above filters were manually inspected and 23 were selected for experimental evaluation.



## Supplementary Information

### 1.6. Expression of dnTRP in shaking flasks and 96-well microtiter plates

The pET-29b plasmids carrying the DNA of dnTRPs were transformed into *E. coli* LEMO21 (DE3). The transformed cells were spread on LB agar plate (with 50 µg/mL kanamycin) and incubated (37 °C, 14h), individually.

For expression in flasks, colonies of each transformation were picked and inoculated into a main culture (ZYP auto-induction medium (200 mL), kanamycin (400 µg/mL), 1L baffled shaking flask) and further incubated (25 °C, 180 rpm) until OD<sub>600</sub> ≥ 12. After expression, the cells were harvested by centrifugation (4 °C, 5000 g, 15 min) and then stored at -20 °C.

To purify the dnTRP, the cell pellets were resuspended and lysed (37°C, 300 rpm for 1 h) with Tris/HCl buffer (50 mL, 25 mM, NaCl (300 mM), lysozyme (1 mg/mL), DNase1 (0.025 mg/mL), pH 7.8). Samples were sonicated on ice (60 % amplitude, 2 seconds on/off, 3 min). The cell lysate was then centrifuged (4 °C, 20,000 g, for 30 min) to separate the clear supernatant from the pellet. The resulting clear supernatant was mixed with imidazole (final concentration = 25 mM) and loaded onto a precast Ni-IDA column (Protino Ni-IDA 2000 kit, MACHEREY-NAGEL). Purified dnTRP was eluted with Tris/HCl buffer (25 mM, NaCl (300 mM), imidazole (250 mM), pH 7.8). Analysis of the clear supernatant of cell lysate, the pellet cell lysate, and the purified protein was performed by sodium dodecyl sulfate–polyacrylamide gel electrophoresis (SDS-PAGE), Supplementary Fig. 2. Purified proteins were dialyzed three times in Tris/HCl buffer (15 L, 25 mM, NaCl (300 mM), pH 7.8) to remove the imidazole. The dialyzed samples were collected and concentrated to 3-6 mg/mL (Amicon® Ultra Centrifugal Filter, 10 kDa MWCO).

For expression in microtiter plates, a single colony was inoculated into a culture (ZYP auto-induction medium (1 mL), kanamycin (400 µg/mL), round-bottom 2 mL 96-well plate) and further incubated (25 °C, 300 rpm, 36 h). After expression, cells were harvested by centrifugation (4 °C, 4400 g, 30 min) and stored (at -20 °C) until use.

To prepare the dnTRP cell-free lysate for library screening in 96-well microtiter plates, cell pellets were lysed (37 °C, 300 rpm, 2 h) in NaOAc buffer (250 µL, 100 mM, MgCl<sub>2</sub> (500 mM), [Cu(Gly)<sub>2</sub>] = 5 mM, lysozyme (1 mg/mL), DNase1 (0.025 mg/mL), pH 4.2). The lysed samples were frozen (-20 °C, 16 h), thawed, and further incubated (37 °C, 300 rpm, 1 h). The cell-free lysate (clear supernatant of the cell lysate, hereafter CFE) was obtained by centrifugation (4 °C, 4400 g, 1 h). For the screening assay, the CFE (95 µL) was carefully transferred into a new assay 96-well plate using the Liquidator™ 96-channel benchtop pipettor (volume range 5-200 µL). Control samples using *E. coli* LEMO21(DE3) transformed with an empty pET-29b vector were prepared similarly for assay evaluation and optimization.

### 1.7. Circular dichroism (CD) spectroscopy of dnTRP

CD spectra of dnTRPs were recorded by CHIRASCAN V100 (Applied Photophysics, United Kingdom). For CD spectra at different pHs, dnTRP<sub>18</sub> (2 µM) was subjected in a citric-phosphate buffer (2.5 mM, NaCl (25 mM), pH 2.6), NaOAc buffer (5 mM, MgCl<sub>2</sub> (25 mM), pH 3.5), NaOAc buffer (5 mM, MgCl<sub>2</sub> (25 mM), pH 4.2) and Tris/HCl buffer (2.5 mM, NaCl (25 mM), pH 8.0),

## Supplementary Information

respectively. The sample (400  $\mu$ L) was transferred in a quartz cuvette (light path 2 mm) and the spectrum was recorded from 260 to 190 nm. For CD spectra to determine thermal stability, dnTRP\_18 (2  $\mu$ M) in Tris/HCl buffer (1 mL, 2.5 mM, NaCl (25 mM), pH 8.0) was incubated (98  $^{\circ}$ C, from 6 min to 120 min) and immediately chilled on dry ice. The sample (400  $\mu$ L) was then transferred into a quartz cuvette (light path 2 mm) and the CD spectrum was recorded from 260 to 190 nm. The CD spectra are displayed in Supplementary Fig. 3.

### 1.8. Determination of the binding affinity ( $K_D$ ) of Ru1 to dnTRPs

The binding affinity of **Ru1** to dnTRP was determined using a tryptophan fluorescence-quenching assay. In brief, samples of dnTRP (198  $\mu$ L, 1.01  $\mu$ M in corresponding buffer) were pipetted into a 96-well plate (flat bottom, black). The cofactor **Ru1** (2  $\mu$ L,  $0.5 \mu\text{M} \leq [\text{Ru1}] \leq 4 \text{ mM}$  in DMSO) was added to the wells and the fluorescence was recorded (excitation: 280 nm, emission: 300 to 400 nm (scanning mode) or 335 nm (kinetics mode)) using a TECAN 1000pro plate reader. The  $K_D$  was calculated by fitting the data to **Equation 1**.

$$\text{Equation 1: } [PL] = \frac{P_{tot} + L_{tot} + K_D - \sqrt{(P_{tot} + L_{tot} + K_D)^2 - 4P_{tot}L_{tot}}}{2}$$

Where  $P_{tot}$  is the total dnTRP concentration (1  $\mu$ M),  $L_{tot}$  is the total **Ru1** concentration titrated.  $[PL]$  is the concentration of the **Ru1**·dnTRP complex which is correlated to the fluorescence signal.

### 1.9. Native mass spectrometry of Ru1-R0

Purified dnTRP\_R0 (153  $\mu$ M) and  $[\text{Ru1}] = 53 \mu\text{M}$  were co-incubated in MES buffer (20 mM, NaCl (150 mM), DMSO (5.2% (v/v)), pH 5.1). The buffer was exchanged with ammonium acetate (50 mM, pH 6.8) by repeated cycles of ultrafiltration to a dilution factor of 100,000 (Amicon, MWCO 10 kDa). The sample was then injected into a Bruker maXisII ESI-QTOF using a syringe pump at a flow rate of 5  $\mu$ L/min. The sample was analyzed in ESI+ mode with 140  $\mu$ s transfer time, 40  $\mu$ s PrePulse Storage, 10 eV collision energy, and an isCID ranging from 0-150 eV, adjusted according to the thickness of the charge envelope observed. Data analysis was carried out using Compass Data Analysis software (Bruker). Spectra were baseline subtracted, smoothed and de-convoluted using a high-resolution maximum entropy set-up. All samples were internally calibrated using a low concentration tuning mix (Agilent) and a linear calibration mode.

### 1.10. Size-exclusion chromatography of Ru1-R0

Purified dnTRP\_R0 (1 mg/mL, MES (50 mM), NaCl (150 mM), pH 5.2) was incubated with  $[\text{Ru1}] = 40 \mu\text{M}$  (4  $^{\circ}$ C, 1 h). The mixture was then injected into an analytical Superdex 200 10/300 GL size-exclusion column and eluted with a MES buffer (50 mM, NaCl (150 mM), pH 5.2). Fractions corresponding to monomeric **Ru1**·R0 were collected.

## Supplementary Information

### 1.11. Optimization Ru1-dnTRPs-based RCM in cell-free extract (CFE)

To investigate the RCM activity in CFE, **Ru1** (3  $\mu$ M, 2  $\mu$ L from a freshly prepared stock (150  $\mu$ M in DMSO)) was added to the CEF of empty vector (97  $\mu$ L, spiked with or without dnTRP\_18 (20  $\mu$ M)) in a 96-well plate (MASTERBLOCK®, 96 WELL, PP, 0.5 ML, V-BOTTOM, GREINER BIO-ONE). The samples were incubated (30 °C, 300 rpm, 1 h), followed by addition of the substrate **1a** (1.25  $\mu$ L, 200 mM stock in DMSO, final concentration is 2.5 mM) to initiate the RCM reaction. RCM reactions were performed by incubation (25 °C, 300 rpm, 18 h). To investigate the effect of DMSO, Cu(Gly)<sub>2</sub>, or diamide on the RCM activity, the CFE from empty vector was prepared in three different buffer conditions: NaOAc buffer (100 mM, MgCl<sub>2</sub> (500 mM), lysozyme (1 mg/mL), DNase1 (0.025 mg/mL), DMSO (12.75 % (v/v), pH 4.2), containing DMSO (12.75% (v/v)), [Cu(Gly)<sub>2</sub>] = 5 mM, or [diamide] = 5 mM, respectively. The results are summarized in Supplementary Fig. 6a.

To investigate the effect of dnTRP\_18's concentration on the TON of RCM in CFE, **Ru1** (0.5  $\mu$ M) was added to the CEF of empty vector (95  $\mu$ L, spiked with varying  $0 \leq [\text{dnTRP\_18}] \leq 25 \mu\text{M}$  (5 $\mu$ L)) in the 96-well plate (MASTERBLOCK®, 96 WELL, PP, 0.5 ML, V-BOTTOM). The samples were incubated (30 °C, 300 rpm, 2 h), followed by addition of the substrate **1a** (1.25  $\mu$ L, 200 mM stock in DMSO, final concentration is 2.5 mM) to initiate the RCM reaction. RCM reactions were performed by incubation (25 °C, 300 rpm, 18 h). The results are summarized in Supplementary Fig. 6b.

### 1.12. Directed evolution of the Ru1-dnTRP\_18

#### **Mutational libraries generation**

The site saturation mutagenesis libraries (SSM) at positions (Q5, E39, F43, E74, L78, L113, E144, A148, and L183) in the first round of screening was generated using dnTRP\_18\_F116W (dnTRP\_R0) as the template. SSM libraries for the second round of screening were generated at positions (E4, Q5, E39, E109, E144, and E179) using dnTRP\_18\_F43R/F116W (dnTRP\_R1) as the template. SSM libraries for the third round of screening were generated at positions (Q5, E39, E144, and E179) using dnTRP\_18\_E4G/F43R/F116W (dnTRP\_R2) as the template, Supplementary Fig. 8b. The primers used for PCRs are listed in Supplementary Table 1. The PCR products were digested with *DpnI* (37 °C, 20 h), cleaned, and intramolecularly cyclized using the Golden Gate assembly or Gibson assembly kit. The cyclized products were individually transformed into *E. coli* Top10 chemically-competent cells, plated on LB agar plate (supplemented with 50  $\mu$ g/mL kanamycin) and cultivated (37 °C, 20 h). Colonies from each library were pooled and the plasmids of the colonies were isolated by miniprep. The resulting plasmids were then individually transformed into *E. coli* LEMO21 chemically-competent cells.

The error prone PCR (epPCR) library was generated using the dnTRP\_R3 (dnTRP\_18\_E4G/F43R/F116W/E144G) as a template. In brief, epPCR was conducted using Taq polymerase 2X Master Mix supplemented with varying concentrations (0.1 to 0.5 mM) of MnCl<sub>2</sub>. The PCR products were digested with *DpnI* (37 °C, 16 h), cleaned, and assembled into the pET-29b vector using the Goldengate assembly kit. The assembled products were transformed into *E.*

## Supplementary Information

*coli* Top10 chemically-competent cells, plated on LB agar plates (supplemented with 50 µg/mL kanamycin), and cultivated (37 °C, 20 h). Mutational frequencies were assessed by sequencing 16 random colonies from each MnCl<sub>2</sub> concentration, and the results summarized in Supplementary Fig. 8f. The selected library with a mutational frequency of 4.1 (at 0.15 mM MnCl<sub>2</sub>) underwent further processing and transformation into *E. coli* LEMO21.

The fragment shuffling library was generated using Gibson assembly. In brief, the DNA sequence of dnTRP was separated into five fragments (with a sequence length of varying from 160 to 190 bp) and individually amplified, Supplementary Table 2. Plasmids of selected variants from rounds 3 and 4 were used as the templates for the PCR amplification of the fragments, Supplementary Fig. 8. After *DpnI* digestion (37 °C, 16 h) and cleanup, the fragments were assembled with the pET-29b vector backbone using the Gibson assembly. The assembled products were transformed into *E. coli* DH5a electro-competent cells, plated on LB agar plates (supplemented with 50 µg/mL kanamycin), and cultivated (37 °C, 20 h). Colonies were pooled and their plasmid DNA was extracted, followed by transformation into *E. coli* LEMO21. Colonies were inoculated in the culture (1 mL, ZYP auto-induction medium) in the 96-well plate to express dnTRP, as described above.

### **Development of the high-throughput screening assay in the 96-well plate**

The stock solution of **Ru1** for RCM with the substrate **1a** in the screening assay was prepared using the following protocol: 1) prepare a stock solution of **Ru1** (1 mM in DMSO); 2) Pipette the stock solution of **Ru1** (10 µL) into a glass vial (2 mL, Clear Robo Vial, 9mm Thread, Item No. VT009-1232) and chill on ice (1 min); 3) Pipette ice chilled NaOAc buffer (990 µL, 100 mM, MgCl<sub>2</sub> (500 mM), pH 4.2) into the vial and gently mix on ice. The resulting **Ru1** solution (final concentration of 10 µM) was used for the RCM reaction.

The freshly prepared CFE (95 µL, see Section 1.6) of the libraries was transferred into a new assay plate (MASTERBLOCK®, 96 WELL, PP, 0.5 ML, V-BOTTOM) using the Liquidator™ 96-channel benchtop pipette (volume range 5-200 µL). After chilling the plate on ice for 15 min, the **Ru1** cofactor (5 µL, 10 µM stock in NaOAc buffer (100 mM, MgCl<sub>2</sub> (500 mM), pH 4.2) was added in the wells using a multi-channel pipette. The plate was then covered with a thick aluminum sealing film (AlumaSeal® 96 film) and incubated (30 °C, 250 rpm, 2 h), Supplementary Fig. 8a. After incubation, the aluminum film was lifted and the substrate **1a** (1 µL, 250 µM stock in DMSO, final concentration 2.5 mM) was added using multi-channel pipette. The plate was re-sealed and incubated (37 °C, 300 rpm, 18 h) for the RCM reaction. After incubation, the plate was chilled (10 min on ice) and methanol was added (400 µL, supplemented with benzyltriethyl-ammonium bromide (200 µM) as internal standard). The plate was re-sealed and incubated (37 °C, 300 rpm, 30 min) to quench the reaction. The plate was centrifuged (4 °C, 4400 g, 30 min) and the clear supernatant (350 µL) was transferred to a new analysis plate (MASTERBLOCK®, 96 WELL, PP, 0.5 ML, V-BOTTOM) and subjected to UPLC-MS analysis. The schematic presentation of the screening protocol, the step-to-step rounds of evolutionary campaigns, and the identified variants from each round are displayed in Supplementary Fig. 8.

## Supplementary Information

### 1.13. Characterizations of evolved Ru1-dnTRP variants

#### *Validation of evolved variants*

The validation of high-performing dnTRP\_18 variants was performed using purified protein samples. Briefly, **Ru1** (5  $\mu$ L from a freshly prepared stock in DMSO, final concentration is 0.5  $\mu$ M) was added to the protein sample (95  $\mu$ L, NaOAc buffer (100 mM),  $\text{MgCl}_2$  (500 mM), purified dnTRP\_18 variant, (21.1  $\mu$ M), pH 4.2) in a glass vial (2 mL, Clear Robo Vial, 9mm Thread, Item No. VT009-1232). After sealing, the vial was incubated (30  $^{\circ}\text{C}$ , 250 rpm, 2 h), then chilled (5 min on ice), opened, and supplemented with substrate **1a** (1  $\mu$ L, 250 mM stock in DMSO, final concentration is 2.5 mM). The vial was re-sealed, incubated (37  $^{\circ}\text{C}$ , 300 rpm, 18 h), chilled (5 min on ice), opened, and mixed with methanol (900  $\mu$ L, containing benzyltriethyl-ammonium bromide (200  $\mu$ M) as internal standard). The vial was re-sealed and incubated (37  $^{\circ}\text{C}$ , 300 rpm, 30 min) to quench the RCM. The vial was then placed in a 24-well plate and centrifuged (4  $^{\circ}\text{C}$ , 4400 g, 30 min), and the clear supernatant (800  $\mu$ L) was transferred to a new vial for UPLC-MS analysis.

#### *RCM by Ru1-dnTRPs at different pHs and temperatures*

RCM reactions at different pHs and temperatures were performed similarly to the method described above for the validation experiments with purified dnTRP samples. For RCM reactions at different pHs, NaOAc buffer (100 mM,  $\text{MgCl}_2$  (500 mM), pH 3.6, 4.2 or 5.2) and MES buffer (100 mM,  $\text{MgCl}_2$  (500 mM), pH 6.0) supplemented with dnTRP (5  $\mu$ M) were used. For RCM reactions at different temperatures, the sealed vials were incubated at various temperatures (37, 50, 70, or 90  $^{\circ}\text{C}$ , 300 rpm, 18 h).

#### *RCM by Ru1-dnTRPs in the presence of glutathione (GSH) at various concentrations*

RCM reactions in presence of GSH were performed similarly as described above for the validation experiments with purified dnTRP samples. Purified dnTRP (10  $\mu$ M) in NaOAc buffer (100 mM,  $\text{MgCl}_2$  (500 mM), pH 4.2) or MES buffer (100 mM,  $\text{MgCl}_2$  (500 mM), pH 6.0) was supplemented with a gradient concentration for GSH (0.1 mM  $\leq$  [GSH]  $\leq$  4 mM). The cofactor **Ru1** (1  $\mu$ M, 5  $\mu$ L from a freshly prepared stock (20  $\mu$ M in ice chilled NaOAc buffer (100 mM,  $\text{MgCl}_2$  (500 mM), pH 4.2) was added into the samples. The rest of the steps were carried out as described above.

#### *RCM of different substrates using Ru1-dnTRPs*

RCM of substrates **1b**, **1c**, **1d**, **1e**, **1f**, **1g** to afford the corresponding cyclized products **2b**, **2c**, **2d**, **2e**, **2f**, and **2g** was performed using a modified protocol that was used for cyclized product **2a**. In brief, **Ru1** (5  $\mu$ L from a freshly prepared stock (16  $\mu$ M in ice chilled MES buffer (100 mM,  $\text{MgCl}_2$  (500 mM), pH 6.0, final concentration is 0.8  $\mu$ M) was added to the dnTRP\_R0/R5- $\Delta$ his protein sample (95  $\mu$ L, MES buffer (100 mM,  $\text{MgCl}_2$  (500 mM), purified dnTRP\_R0/R5- $\Delta$ his (10.5  $\mu$ M), pH 6.0) in a glass vial (2 mL, Clear Robo Vial, 9mm Thread, Item No. VT009-1232). The vials were tightly sealed and incubated (30  $^{\circ}\text{C}$ , 250 rpm, 2 h). After chilling (5 min, on ice), the substrate **1b**, **1c**, **1d**, **1e**, **1f**, or **1g** (1  $\mu$ L, 200 mM stock in DMSO, final concentration is 2.0 mM) was added. The vials were re-sealed and incubated (37  $^{\circ}\text{C}$ , 300 rpm, 18 h). To prepare samples

## Supplementary Information

for UPLC-MS analysis in the RCM reactions of **1a**, **1b**, **1c**, and **1d**, methanol (900  $\mu$ L, containing 200  $\mu$ M benzyltriethyl-ammonium bromide as the internal standard) was added. To prepare samples for GC-MS analysis, EtOAc (500  $\mu$ L, containing 1 mM biphenyl as the internal standard) was added to RCM samples of **1e**, EtOAc (500  $\mu$ L, supplemented with [naphthalene] = 1 mM) as the internal standard) for RCM samples of **1f** and **1g**. After adding methanol or EtOAc, all vials were sealed, incubated (37 °C, 300 rpm, 30 min), and centrifuged (4 °C, 4400 g, 30 min). The clear supernatant (800  $\mu$ L: RCM of **1a**, **1b**, **1c**, and **1d**) was subjected to UPLC-MS analysis. The upper EtOAc phase (300  $\mu$ L: RCM of **1e**, **1f**, and **1g**) was subjected to GC-MS analysis. Calibration curves for calculating of the yield/TON of cyclized products **2a**, **2b**, **2c**, **2d**, **2e**, **2f**, or **2g** are summarized, Supplementary Fig. 12.

### 1.14. X-ray study of Ru1-dnTRPs

#### **Preparation of dnTRP- $\Delta$ His variants**

The purified dnTRPs (1 mg/L, 10 mL, Tris/HCl, 25 mM, NaCl (300 mM), pH 7.8) featuring an N-terminal hexa-histidine and a TEV protease cleave site were supplemented with TEV protease (0.02 mg/L). Digestion was achieved by incubation (4 °C, 48h, no shaking). The sample was then loaded onto a precast Ni-IDA column and the flow-through containing cleaved dnTRP sample was collected. The size and purity of cleaved dnTRP samples were analysis with SDS-PAGE, Supplementary Fig. 9a. The pure dnTRP cleaved protein was then concentrated and buffer-changed by ultrafiltration (Amicon® Ultra Centrifugal Filter, 10 kDa MWCO). In the case of dnTRP\_R0 (*apo/holo*), the protein was further purified by size-exclusion chromatography.

#### **X-ray structures of apo dnTRP\_R0- $\Delta$ His, Ru1-R0- $\Delta$ His and Ru1-R5- $\Delta$ His**

Freshly purified dnTRP\_R0- $\Delta$ His (6.4 mg/mL, MES (50 mM), NaCl (150 mM), pH 5.2) was pipetted into MRC 3 well plates (reservoir volume (45  $\mu$ L), drop volume (0.4  $\mu$ L), SWISSCI, Switzerland) in a 1:1 ratio of sample solution to mother liquor. Crystals were harvested after 8 days of growth in sodium malonate (0.2 M, 20% (w/v) PEG 3350 (E8 PEG-Ion HT), pH 7.0).

Freshly purified and dnTRP\_R0- $\Delta$ His (5 mg/mL, MES (50 mM), NaCl (150 mM), pH 5.2) was incubated with **Ru1** (1:1 molar ratio) overnight at 4 °C. The sample was centrifuged (4400 g, 4 °C, 10 min) and pipetted into MRC 3 well plates (reservoir volume (45  $\mu$ L), drop volume (0.4  $\mu$ L)) in a 1:1 ratio of sample solution to mother liquor. Crystallography data were collected using the same protocol as described for the *apo* dnTRP\_R0- $\Delta$ His.

Freshly purified dnTRP\_R5- $\Delta$ His (13 mg/mL, Tris/HCl (25 mM), NaCl (300 mM), pH 8.0) was set up for 96-well crystallization screens by mixing precipitation buffer (0.15  $\mu$ L) using a robot (Crystal Gryphon, Art Robins Instruments, USA; MRC 3-well plates), equilibrated against precipitation buffer (32  $\mu$ L), and stored at 20 °C. Apo crystals were grown in sodium formate (2.0 M) and sodium acetate (0.1 M), pH 5.0 (Proplex™, Molecular Dimensions), and soaked with **Ru1**. **Ru1** (0.4  $\mu$ L, 5 mM in DMSO) was mixed with the precipitation buffer (4.6  $\mu$ L), and this mixed solution (2.5  $\mu$ L) was added to the drop containing crystals. After soaking (48 h, 20 °C), the crystals were

## Supplementary Information

cryo-protected with ethylene glycol (25 % (w/v)) and flash-frozen in liquid nitrogen prior to data collection.

The data collection was carried out at the Diamond Light Source beam line I03 at wavelengths of 0.9763-0.9999 Å. XDS<sup>18</sup> was used for crystal indexing, integration, and AIMLESS<sup>19</sup> for scaling, within the graphical interface CCP4i2<sup>20</sup> of the CCP4 suite. The structures were solved by molecular replacement using PHASER/MOLREP<sup>21</sup> and an AlphaFold<sup>14</sup> search model. Iterative cycles of REFMAC5<sup>22</sup> and manual refinement in COOT<sup>23</sup> were used to improve the models. Ligand restraints were generated using eLBOW<sup>24</sup> and modified using REEL<sup>25</sup>. Modeling of the cofactor **Ru1** was based on residual electron density in the  $F_o-F_c$  map and anomalous dispersion density of Ru atom. Solvent molecules were not modelled because of low resolution. All figures were generated with PyMOL (PyMOL Molecular Graphics System, Version 2.5.0, Schrödinger, LLC). The PDB codes for the finalized structures of *apo* dnTRP\_R0-Δhis, **Ru1**-R0-Δhis and **Ru1**-R5-Δhis are 9GVF, 8S6P, and 9H3C, respectively. Data collection and refinement statistics are listed in **Table S4**.

### 1.15. Cytoplasmic RCM in *E. coli*

In this section, three MES buffers with different compositions were used. The MES working buffer: 50 mM, MgCl<sub>2</sub> (100 mM), glycerol (5% (v/v)), pH 6.0; The MES incubation buffer: MES working buffer supplementing 0.02 % (w/v) poloxamer 188; The MES washing buffer: MES incubation buffer supplementing 0.0075 % (v/v) Triton X-100, pH 6.0.

#### ***In vivo ring-closing methathesis protocol***

To assemble the cytoplasmic **Ru1**-dnTRPs (cells harbor empty vector (EV) as the negative control), freshly harvested cells were gently resuspended in MES working buffer (50 mM, MgCl<sub>2</sub> (100 mM), glycerol (5% (v/v)), pH 6.0) to a cell density around 25 g/L (wet cell weight). Cell samples (1 mL) were individually transferred into a round-bottom 24-well plate, supplemented with the cofactor **Ru1** (1, 2, 5 or 10 μL from a freshly prepared stock (1 mM in DMSO)), and incubated (15 °C, 800 rpm, 1 h) for *in vivo* assembly of artificial metathase. After incubation, cells were isolated by centrifugation (4 °C, 2600 g, 3 min). The obtained cells were then subjected to five cycles of washing steps, which involved cell resuspension in MES working buffer (1 mL), incubation (15 °C, 1000 rpm, 15 min), and cell collection by centrifugation (20 °C, 2600 g, 3 min). The cells then were resuspended in MES working buffer (0.33 mL) at a cell density around 75 g/L (wet cell weight). The resuspended cell sample (100 μL) was aliquoted into a 96-well plate (MASTERBLOCK®, 96 WELL, PP, 0.5 ML, V-BOTTOM), supplemented with substrate **1a** (2.5 mM, 1 μL from a stock (250 mM in DMSO, and incubated (20 °C, 300 rpm, 22 h) under sealed conditions. The subsequent steps concerning reaction quenching, sample preparation, and UPLC-MS analysis were carried out as for the protocol in Section of 1.13. The results are summarized in Supplementary Fig. 15b.

#### ***Engineering of dnTRP\_R5 based on in vivo RCM activity***

## Supplementary Information

The plasmid of pET-29b dnTRP\_R5 was used as template for constructing of dnTRP\_R5 L8X, L113X, A148X, and L183X (where X represents any amino acid except cysteine and proline). The PCR amplifications were conducted in a 96-well PCR plate using corresponding primers, Supplementary Table 3. The PCR products were first digested with *DpnI* (37 °C, 20 h) and then individually transformed (3 µL) into *E. coli* Top10 chemically-competent cells (15 µL) in a new 96-well PCR plate. The transformed cells were individually plated on LB agar (supplemented with 50 µg/mL kanamycin) and cultivated (37 °C, 20 h). The colonies with the correct sequence were cultivated in LB medium (3 mL, supplemented with 50 µg/mL kanamycin), and the plasmids were isolated by miniprep. The plasmids were then individually transformed into *E. coli* LEMO21 chemically-competent cells in a 96-well PCR plate. The transformed cells were plated on LB agar plate (with 50 µg/mL kanamycin) and incubated (37 °C, 14 h). Colonies were picked and inoculated into a main culture (ZYP auto-induction medium (30 mL), kanamycin (400 µg/mL), in a 250 mL baffled shaking flask) to express the corresponding TRPs. The culture was initially incubated (37 °C, 180 rpm) to an OD<sub>600</sub> = 0.3–0.4, followed by further incubation (20 °C, 180 rpm, ≥ 18 h) to an OD<sub>600</sub> ≥ 14. After expression, cells were harvested by centrifugation (4 °C, 2600 g, 10 min).

To perform screening of the sixty-eight dnTRP\_R5 variant library at positions L8, L113, A148, and L183 for cytoplasmic RCM, a simplified protocol was applied. In brief, the harvested cells were immediately resuspended in the MES incubation buffer (50 mM, MgCl<sub>2</sub> (100 mM), glycerol (5% (v/v)), 0.02 % (w/v) poloxamer 188, pH 6.0) to a cell density at 25 g/L (wet cell weight). The cell samples (0.3 mL) were transferred into a 96-well plate (MASTERBLOCK®, 96 WELL, PP, 0.5 ML, V-BOTTOM), supplemented with the cofactor **Ru1** (1.5 µL from a freshly prepared stock (1 mM in DMSO), final concentration 1.5 µM), and incubated (30 °C, 1000 rpm, 1.5 h). After incubation, cells were obtained by centrifugation (25 °C, 2600 g, 5 min). Obtained cell samples were then processed a double replicated washing step, which consisted of cell resuspension in MES washing buffer (0.3 mL, 50 mM, MgCl<sub>2</sub> (100 mM), glycerol (5% (v/v)), 0.02 % (w/v) poloxamer 188, 0.0075% (v/v) Triton X-100, pH 6.0), incubation (30 °C, 1000 rpm, 30 min), and cell collection by centrifugation (25 °C, 2600 g, 3 min). The cells were resuspended in the MES incubation buffer (0.1 mL, 50 mM, MgCl<sub>2</sub> (100 mM), glycerol (5% (v/v)), 0.02 % (w/v) poloxamer 188, pH 6.0) at a cell density around 75 g (wet cell weight)/L. To perform the whole-cell RCM at pH 4.2 or 5.2, cells were resuspended in NaOAc incubation buffer (0.1 mL, 50 mM, MgCl<sub>2</sub> (100 mM), glycerol (5% (v/v)), 0.02 % (w/v) poloxamer 188) with pH at 4.2 or 5.2. The subsequent steps were conducted as described above. A schematic representation of the screening protocol for the directed evolution of **Ru1**-dnTRP in the cytoplasm of *E. coli* is presented Supplementary Fig. 17.

### 1.16. Inductively-coupled plasma mass spectrometry (ICP-MS)

Freshly harvested cells expressing dnTRP\_R5 (cells harbor empty vector (EV) were used as controls) were immediately resuspended in MES working buffer (50 mM, MgCl<sub>2</sub> (100 mM), glycerol (5% (v/v)), pH 6.0) at a cell density of 25 g/L (wet cell weight). The resuspended cell samples (20 mL) were transferred into a Falcon tube (50 mL, polypropylene Conical Tube, 30 × 115 mm style) and supplemented with the cofactor **Ru1** (40 µL from a freshly prepared stock (1



## Supplementary Information

mM in DMSO), final concentration is 2  $\mu$ M). The samples were incubated (20 °C, 300 rpm, 1 h), after which the cells were harvested by centrifugation (4 °C, 2600 g, 10 min). Obtained cells were then subjected to five washing step cycles, which involved cell resuspension in MES working buffer (20 mL), incubation (20 °C, 300 rpm, 15 min), and cell collection by centrifugation (4 °C, 2600 g, 8 min). The cells were then frozen (20 °C, 600 rpm, 22 h), thawed (37 °C, 300 rpm, 30 min), and resuspended in MES working buffer (5 mL) for cell fragmentation. A schematic representation of the steps for the preparation of cell fragments is summarized in Supplementary Fig. 16a, following a previously reported protocol<sup>26</sup>. In brief, the cells were lysed on ice by sonication (1 second on/off, 60 % amplitude, 5 min). The clear supernatant 1 (hereafter refers as clear supernatant obtained by cell lysis of sonication) and cell pellet 1 (referred to as cell debris) were obtained by centrifugation (4 °C, 12,000 g, 10 min). The clear supernatant 1 was further processed with an ultracentrifugation (4 °C, 87,000 g, 2.5 h) to afford the clear supernatant 2 (hereafter referred to cytoplasmic fragment) and cell pellet 2 (hereafter referred to membranous fragments). Cell pellet 1 and cell pellet 2 were fully resuspended in MES working buffer (5 mL). The contents of dnTRP\_R5 in the prepared fragments were analyzed by SDS-PAGE, Supplementary Fig. 16b. For inductively coupled plasma mass spectrometry (ICP-MS), the samples of clear supernatant 1 / 2 and cell pellet 1 / 2 were from three independently performed experiments were pooled, aliquoted, and subjected to ICP-MS analysis.

### 1.17. Cell viability: colony formation assay

The viability of *E. coli* LEMO21 cells that harbor the cytoplasmic dnTRP R5 before and after the RCM was determined. To determine the cell viability prior to ring-closing metathesis (RCM), after expression, the cell density (OD<sub>600</sub>) was immediately determined by aliquoting the cell culture (50  $\mu$ L) into ZYP-5052 medium (950  $\mu$ L). The cell culture was aliquoted (100  $\mu$ L) into a sterile 1.5 mL microcentrifuge tube and subjected to a serial of dilution in ZYP-5052 to a final OD<sub>600</sub> =  $3 \times 10^{-5}$ . The diluted cell culture was aliquoted (100  $\mu$ L) and plated onto three LB agar plates (supplemented with 50  $\mu$ g/mL kanamycin). The plates were incubated (37 °C, 24 h) and the number of colonies on each plate was counted. A similar protocol was used to process the cells following the whole cell RCM reaction (as described in Section 1.15). The cell viability rate (%) after RCM is defined as the ratio (percentage) of colony number after RCM divided by the number of colonies before RCM. The whole-cell harboring **Ru1**-dnTRP\_R5 retained 50 % cell viability after RCM (Supplementary Fig. 15d).

# Supplementary Information

## 2. Supplementary Figures

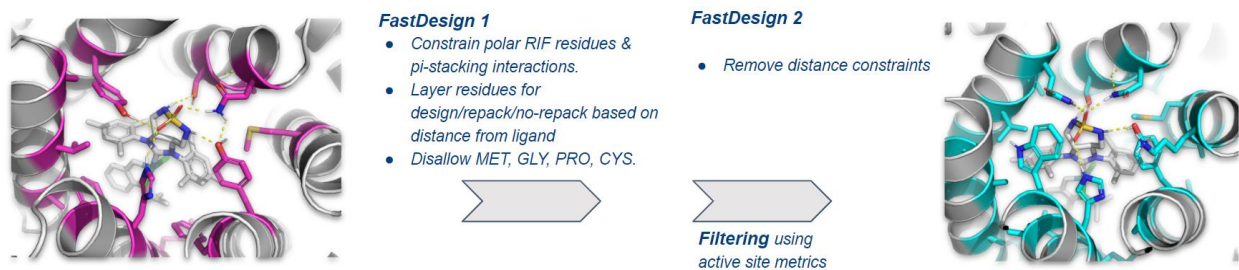

### 2.1. Supplementary Fig. 1. Procedure adopted for the design of the cofactor Ru1 binding site with Rosetta FastDesign.

In the first step, the sequence around the ligand was designed while the identities of RifDock-placed residues (shown in magenta) were fixed, and distances of polar interactions were constrained. In the second stage, the distance constraints were omitted and the sequence was re-optimized.

## Supplementary Information

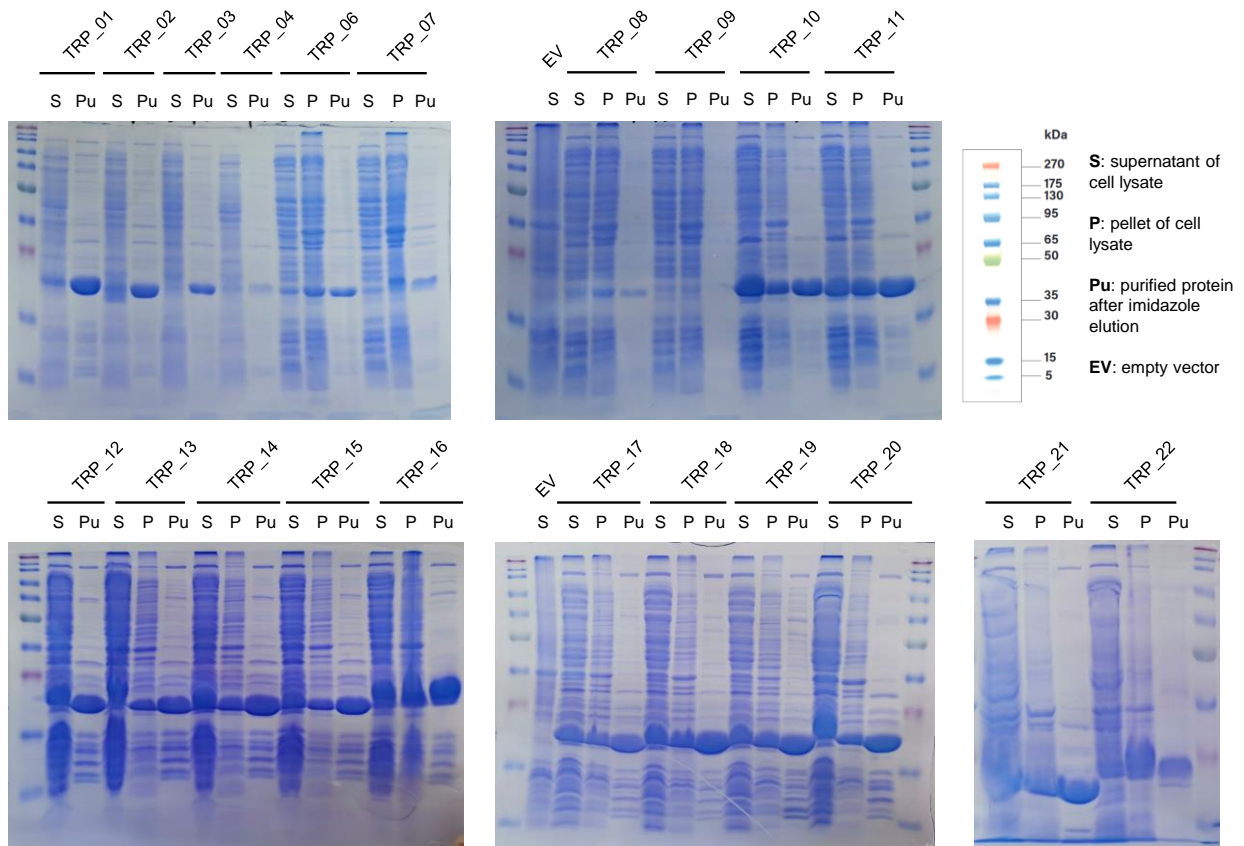

### 2.2. Supplementary Fig. 2. Expression and purification of dnTRP designs.

Colonies of transformed *E. coli* LEMO21 (DE3) were directly inoculated into ZYP auto-induction medium (supplemented with 400 µg/mL kanamycin) and incubated (25 °C, 180 rpm, 24 h). The harvested cell pellets were stored (-20 °C) before use. Cells were lysed (37 °C, 300 rpm for 1 h) with Tris/HCl buffer (25 mM, NaCl (300 mM), lysozyme (1 mg/mL), *DNase*1 (0.025 mg/mL)). The clear supernatant (**S**) and pellet (**P**) of the cell lysate were obtained by centrifugation (4 °C, 20,000 g, for 30 min). To purify the dnTRPs, the clear supernatant was mixed with imidazole (25 mM) and loaded into a precast Ni-IDA column. Purified dnTRPs (**Pu**) were obtained by eluting with Tris/HCl buffer (25 mM, NaCl (300 mM), imidazole (250 mM)). Analysis of the clear supernatant of cell lysate (**S**), the pellet cell lysate (**P**), and the purified elution fragment (**Pu**) was performed by SDS-PAGE.

## Supplementary Information

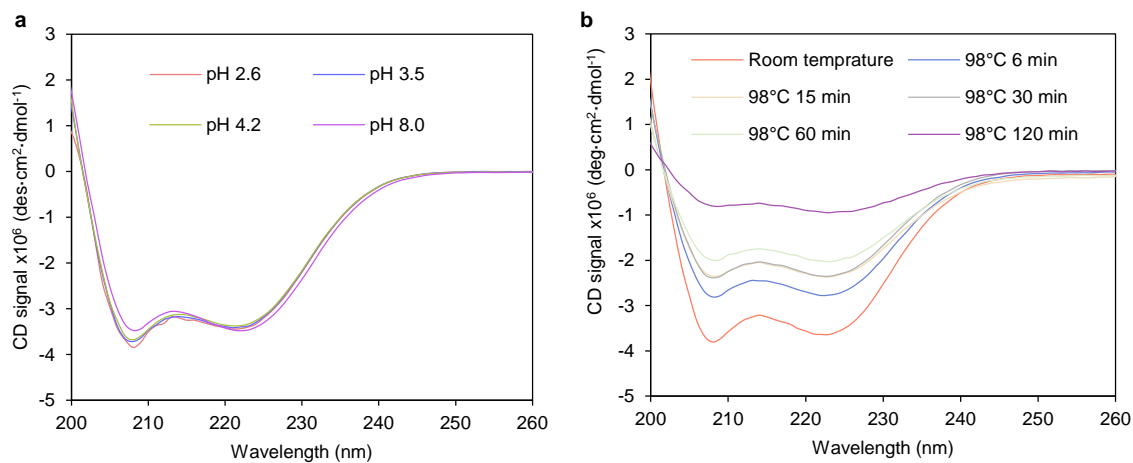

**2.3. Supplementary Fig. 3. Circular dichroism (CD) spectra of dnTRP\_18 at different pHs (a) and following incubation at 98 °C (b).**

## Supplementary Information

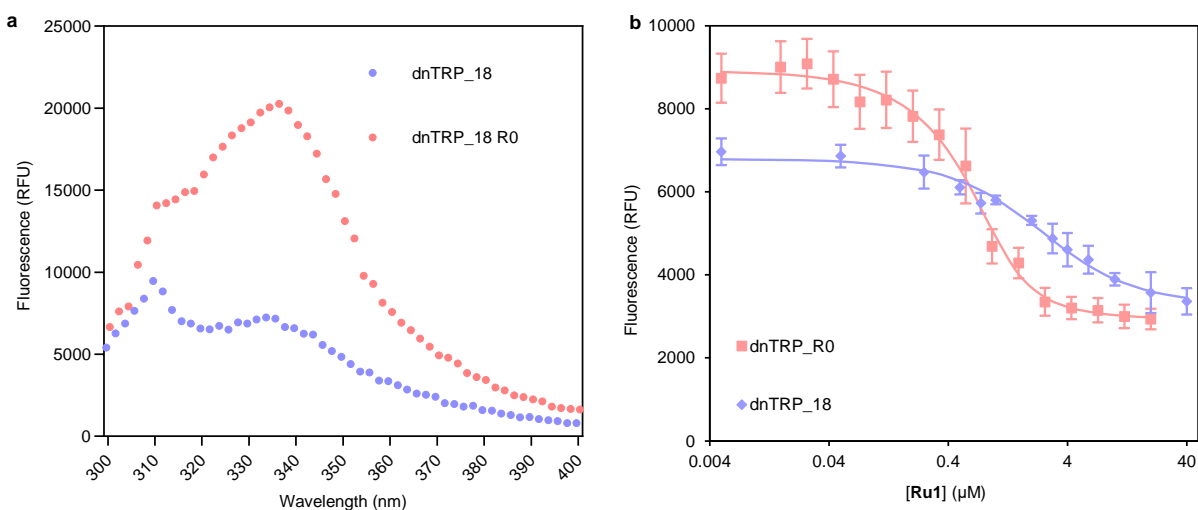

### 2.4. Supplementary Fig. 4. Tryptophan fluorescence-quenching assay for the determination of the binding affinity of Ru1 to dnTRPs.

**a.** Fluorescence scanning of dnTRP\_18 and dnTRP\_18\_F116W (dnTRP\_R0) in NaOAc buffer (100 mM, MgCl<sub>2</sub> (500 mM), pH 4.2). The sample was excited at 280 nm and emission was recorded between 300 - 400 nm. The emission at 335 nm was selected for further studies. **b.** Fitted curve of dnTRP\_18 and dnTRP\_R0 after incubation with cofactor **Ru1** in NaOAc buffer (100 mM, MgCl<sub>2</sub> (500 mM), pH 4.2) at room temperature for 2 h. The fitting procedure affords  $K_D = 1.95 \pm 0.31 \mu\text{M}$  and  $0.16 \pm 0.04 \mu\text{M}$  for dnTRP\_18 and dnTRP\_R0, respectively. Data in **b** are displayed as mean values  $\pm$  standard deviations of three replicates ( $n = 3$ ). The replicates were independently performed using the same stock of each purified dnTRP.

## Supplementary Information

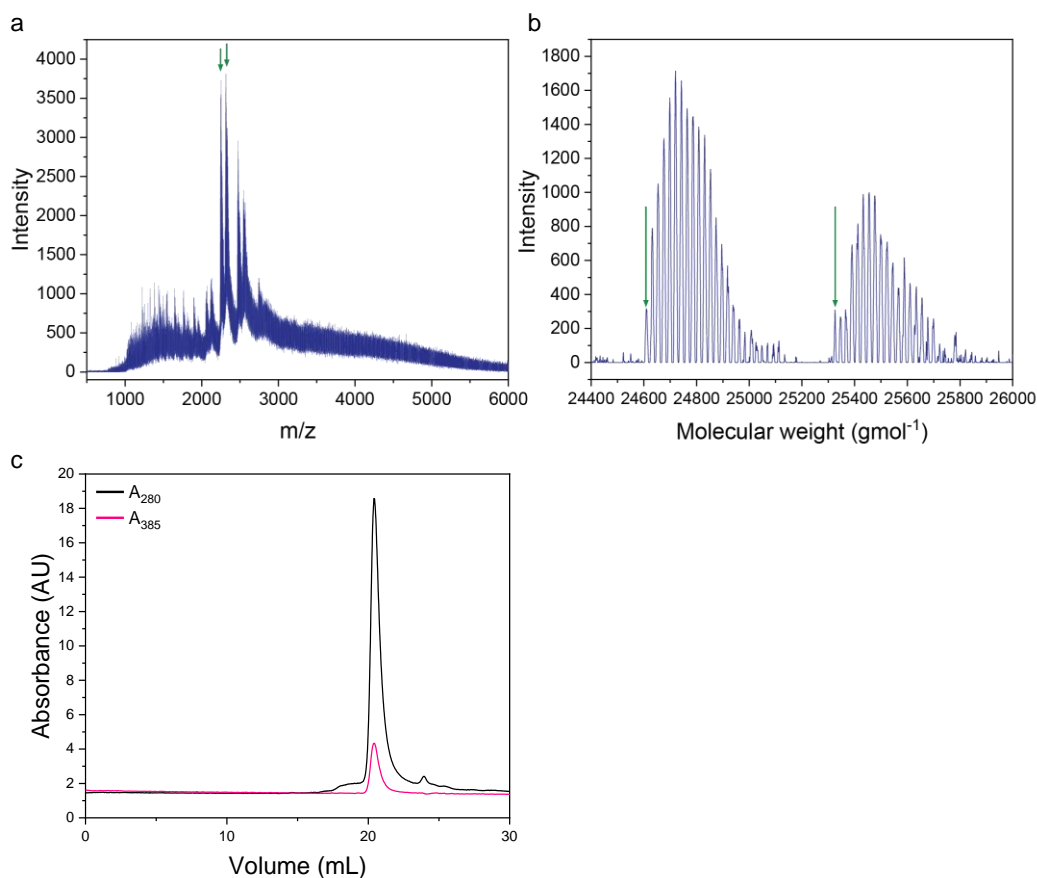

### 2.5. Supplementary Fig. 5. Native mass spectrometry and size-exclusion chromatography of Ru1-R0.

Untreated  $m/z$  spectra (shown in **a**) and the de-convoluted spectrum (shown in **b**) show one charge envelope from the apo dnTRP\_R0 (monitored molecular weight:  $24611.3 \text{ g}\cdot\text{mol}^{-1}$ , calculated molecular weight:  $24610.08 \text{ g}\cdot\text{mol}^{-1}$ ) and the holo **Ru1**-R0 ( $25325.8 \text{ g}\cdot\text{mol}^{-1}$ ). The peaks of apo and holo spectra were highlighted by the green arrows. The average molecular weight difference between ten sets of apo/holo peaks is  $712.63 \pm 1.38 \text{ g}\cdot\text{mol}^{-1}$ , which corresponds with the calculated molecular weight of the cofactor (with the chlorides displaced by waters:  $712.22 \text{ g}\cdot\text{mol}^{-1}$ ). **c.** Size-exclusion chromatography of **Ru1**-R0. The protein and cofactor co-elute, with maximum absorption peaks at 280 nm and 385 nm, respectively.

## Supplementary Information

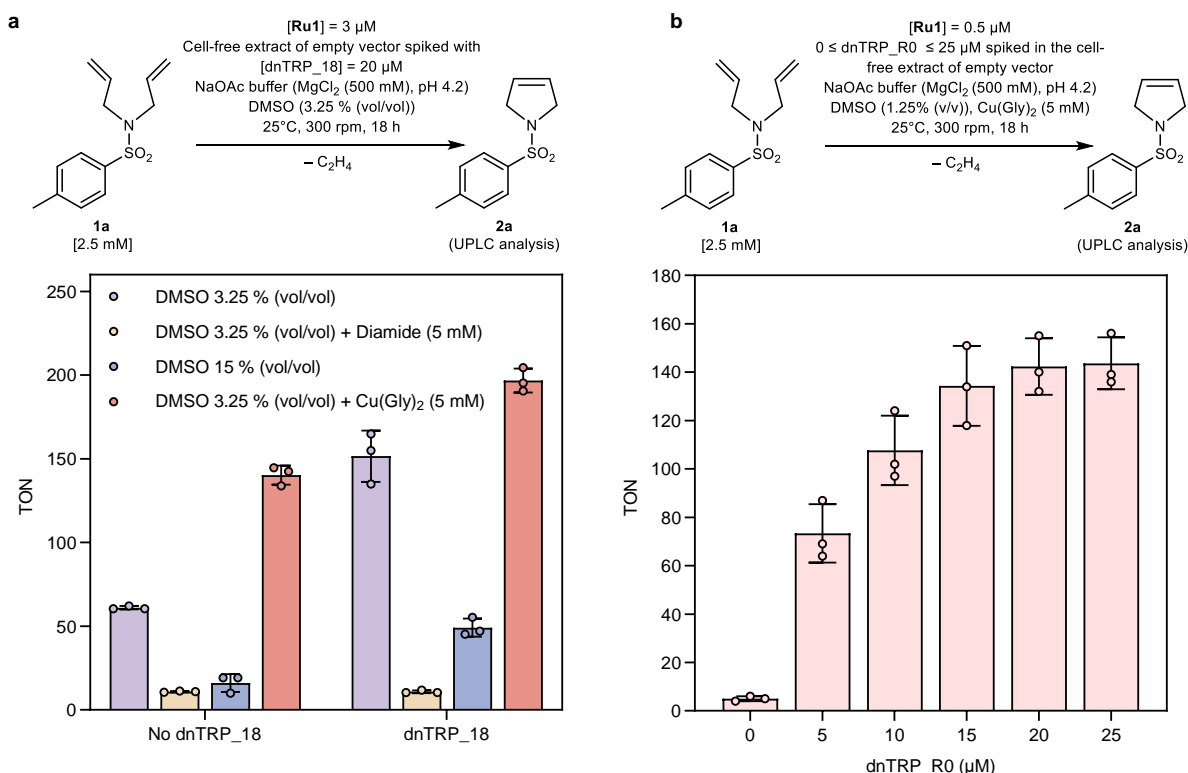

### 2.6. Supplementary Fig. 6. Optimization of ring-closing metathesis in cell-free extract (CFE).

**a** Evaluation of the effect of GSH-oxidizing agents on RCM activity: the CFE, spiked with cofactor [Ru1] = 3  $\mu$ M was supplemented: DMSO (3.25 % or 15% (v/v)), or DMSO (3.25 % (v/v)) + Cu(Gly)<sub>2</sub> (5 mM), or DMSO (3.25 % (v/v)) + diamide (5 mM). **b** RCM of substrate **1a** in the presence of varying concentrations of dnTRP\_R0. The CFE was prepared by lysis of empty vector cells with NaOAc buffer (100 mM, MgCl<sub>2</sub> (500 mM), lysozyme (1 mg/mL), DNase1 (0.03 mg/mL)). Data in panels **a** and **b** is displayed as mean values  $\pm$  standard deviations of three replicates ( $n = 3$ ). The replicates were independently performed using the same stocks of cell-free extract of empty vector, purified dnTRP\_18, and purified dnTRP\_R0.

## Supplementary Information

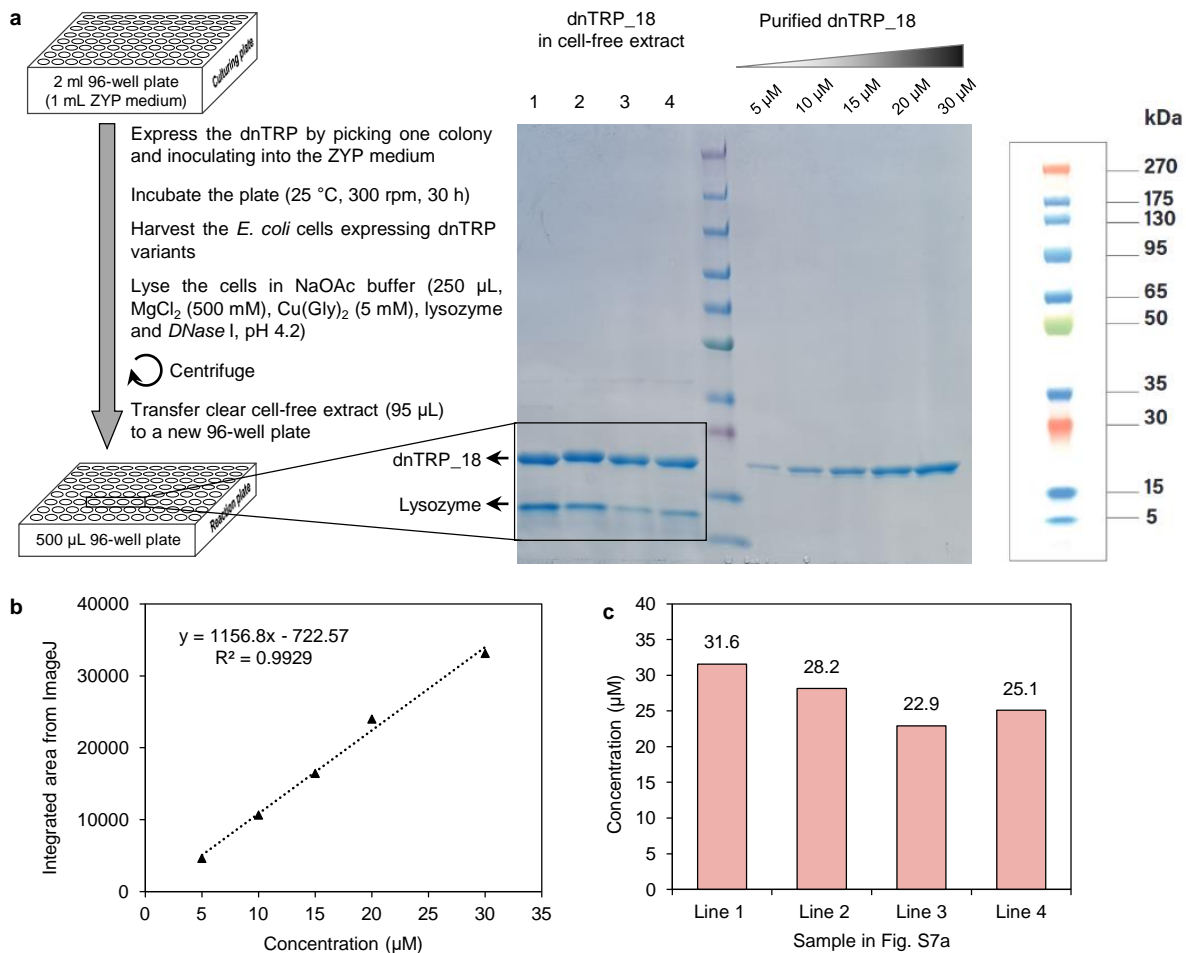

### 2.7. Supplementary Fig. 7. Expression and determination of the concentration of dnTRP\_18 in the cell-free extract in a 96-well plate format.

**a** Left: Expression of dnTRP\_18 in the 96-well plate (2 mL, round bottom). The clear supernatant of cell lysis (cell-free extract, CFE) was transferred into an assay plate and used for screening. For sodium dodecyl sulfate–polyacrylamide gel electrophoresis (SDS-PAGE), the cell-free extract was incubated (70 °C, 30 min) and centrifuged (4 °C, 21,000 g, 10 min). Middle: SDS-PAGE of the isolated CFE from four wells in the 96-well plate (Line 1 to 4, using the protocol from left) and different loading amounts of purified dnTRP\_18. **b** Calibration curve generated from **a** by ImageJ 1.52a. **c**. Calculated concentration of dnTRP\_18 in Line 1 to 4 in **a** using the calibration curve in **b**. The averaged concentration of the four wells was  $26.9 \pm 3.8$  µM.



## Supplementary Information

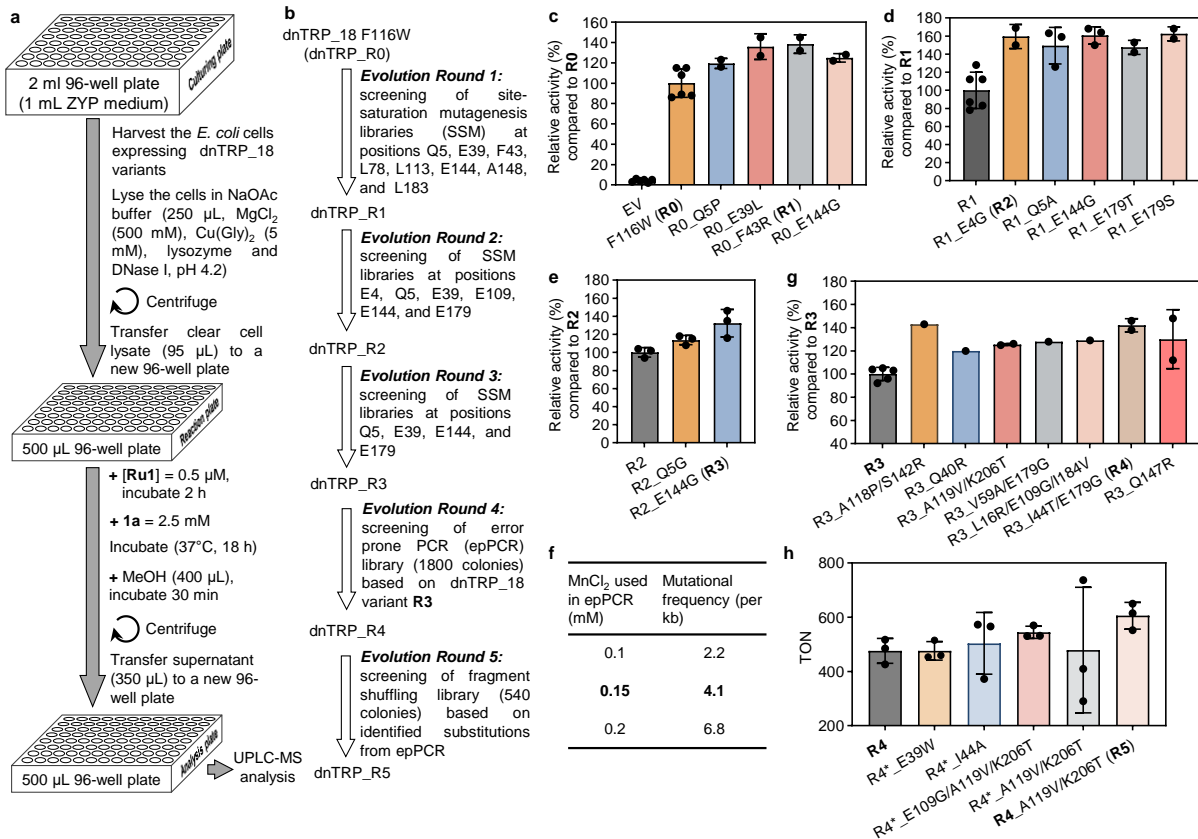

### 2.8. Supplementary Fig. 8. Directed evolution of Ru1-dnTRP using cell-free extracts at pH 4.2.

**a** Schematic representation of the high-throughput screening assay of Ru1-dnTRPs using cell-free extract (CFE) in a 96-well plate format. **b** Summary of the directed evolution campaign of Ru1-dnTRP using CFE. Rounds 1, 2 and 3 were performed by screening site-saturation mutagenesis libraries. Rounds 4 and 5 were performed by screening an error-prone PCR (epPCR) library and a gene shuffling library, respectively. The identified variants in round 1 (**c**), 2 (**d**) and 3 (**e**) SSM libraries screening. **f** Mutational frequency (mutations in per kilo base pair) of the transformed libraries using different concentrations of MnCl<sub>2</sub> (0.1, 0.15 and 0.2 mM) in the epPCR. **g** Relative activity of the variants compared to the parent (dnTRP\_R3: dnTRP\_18\_E4G/F43R/F116W/E144G) identified from the epPCR library. **h**. Turnover number (TON) of variants (purified) identified from the fragment shuffling library in round 5. dnTRP\_R4\*: dnTRP\_18\_E4G/F43R/F116W/E144G/E179G. The identified variants in rounds 3 - 4 with the mutations lying in the corresponding range of the DNA sequence were used as the templates for each fragment PCR. The primers used for fragment and vector backbone PCRs are listed in Supplementary Table 3. In panels **c**, **d**, **e**, and **g**, the biological replicates are represented where two or more data points are shown within the bar chart. Data in panel **h** is displayed as mean values  $\pm$  standard deviations from three replicates ( $n = 3$ ). The replicates were independently performed using the same stock of purified dnTRP.

## Supplementary Information

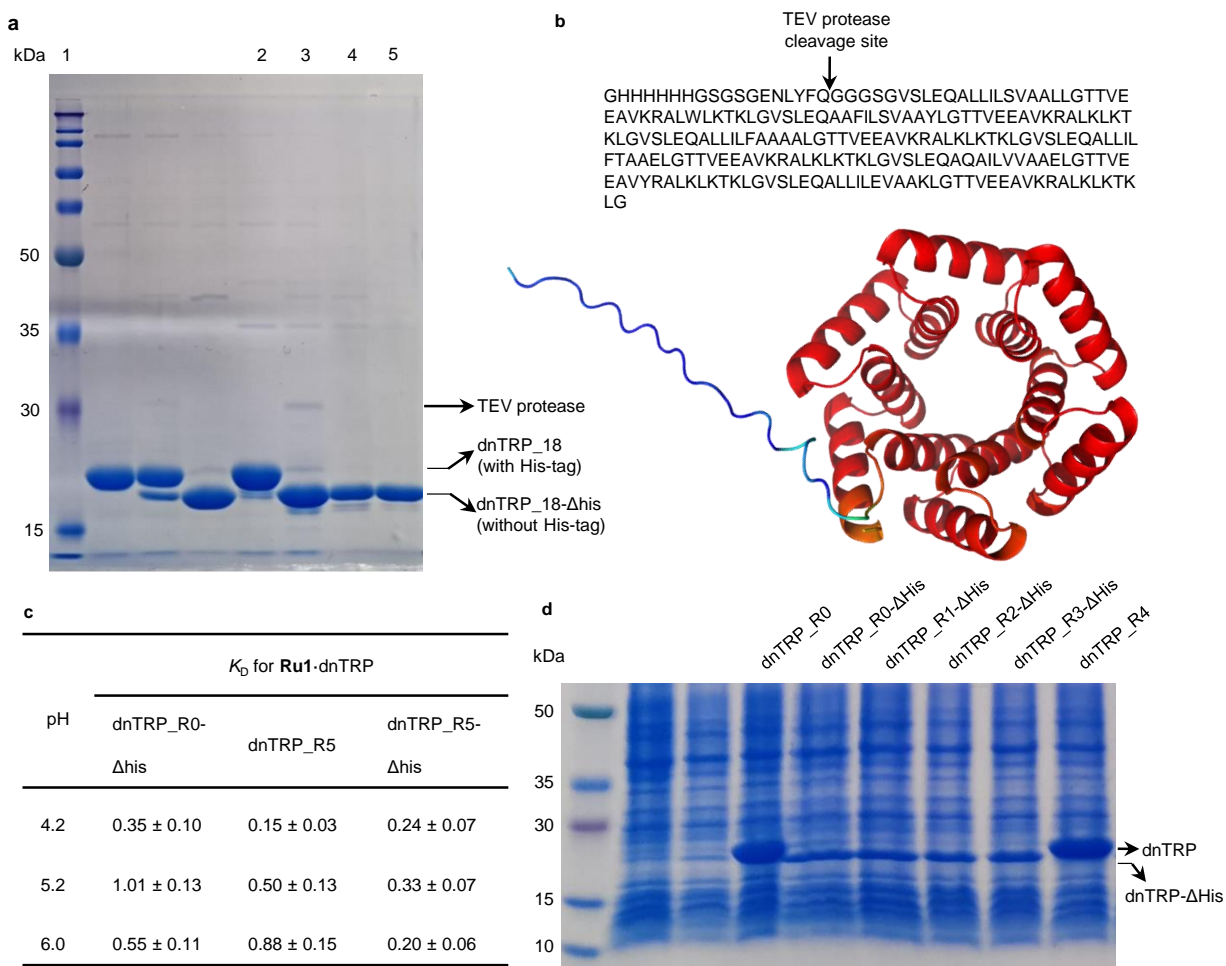

### 2.9. Supplementary Fig. 9. Removal of N-terminal His-tag from dnTRPs and resulting $K_D$ of Ru1·dnTRP.

**a** Sodium dodecyl sulfate–polyacrylamide gel electrophoresis (SDS-PAGE) of TEV-digested dnTRP<sub>18</sub> (as example). Line 1: protein standards; Line 2: dnTRP<sub>18</sub> (1 mg/mL) without TEV protease treatment; Line 3: TRP<sub>18</sub> (1 mg/mL) digested with (0.02 mg/mL) TEV protease (4 °C, 48 h); Line 4/5: Flow through and washed sample of line 3 after loading to Ni-IDA column; **b** AlphaFold2 predicted structure of dnTRP<sub>R5</sub> with N-terminal hexa-histidine and TEV protease cleavage sequences. The TEV protease cleavage site is highlighted with a red arrow. **c** Binding Affinity ( $K_D$ ) of Ru1 to dnTRP<sub>R0</sub>-Δhis, dnTRP<sub>R5</sub>, and dnTRP<sub>R5</sub>-Δhis at different pHs. The data in **c** are displayed as mean values ± standard deviations of three replicates (n = 3). The replicates were independently performed using the same stock of each purified dnTRP. **d** Whole-cell SDS-PAGE of cytoplasmically expressed dnTRPs and their ΔHis variants.

## Supplementary Information

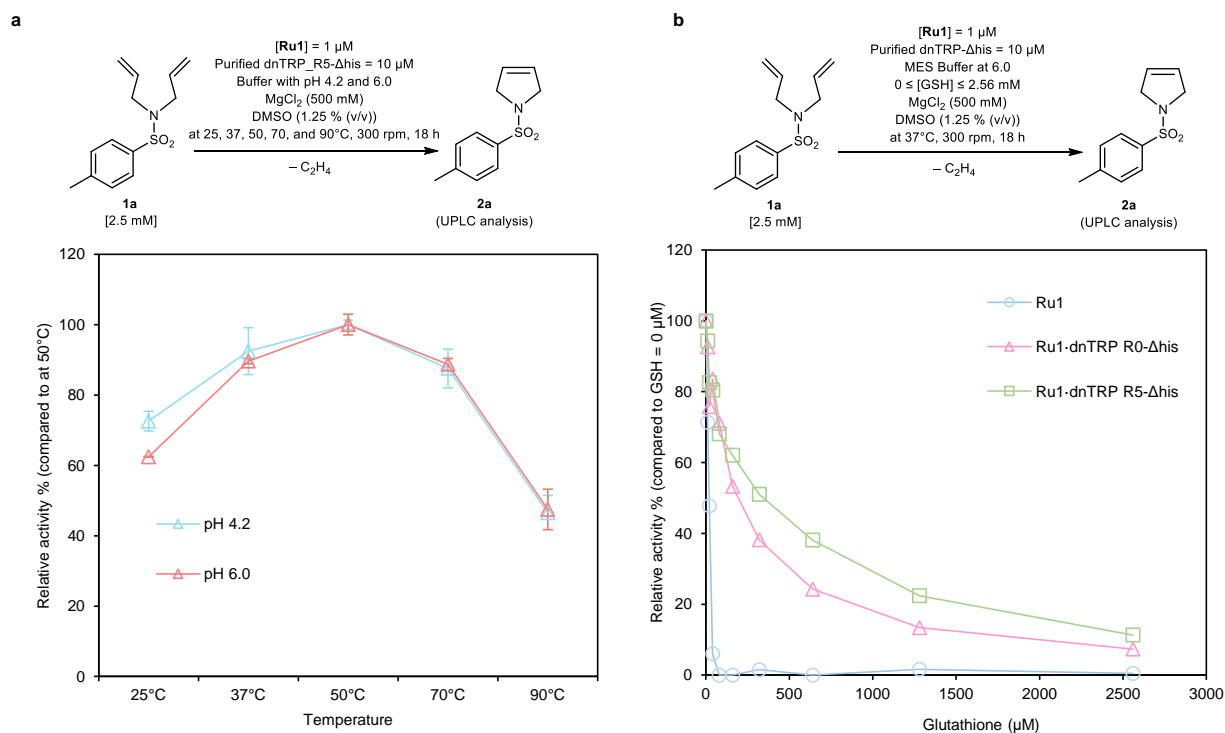

### 2.10. Supplementary Fig. 10. Activity of Ru1·dnTRPs at different temperatures and in presence of varying concentrations of glutathione (GSH).

**a.** TON of Ru1·R5- $\Delta$ his for ring-closing metathesis (RCM) with substrate **1a** at different temperatures. The RCM reactions were performed at pH 4.2 and 6.0. A 100% relative activity is defined as the activity at 50 °C. Data are displayed as mean values  $\pm$  standard deviations of three replicates ( $n=3$ ). The replicates were independently performed using the same stock of the purified dnTRP\_R5- $\Delta$ His. **b** Activity profiles of Ru1, Ru1·R0- $\Delta$ his, and Ru1·R5- $\Delta$ his in the presence of various GSH concentrations. A 100% relative activity is defined as the activity in the absence of GSH. The RCM reactions were performed at pH=6.0. At pH=4.2, NaOAc buffer (100 mM, MgCl<sub>2</sub> (500 mM)) was used. At pH=6.0, MES buffer (100 mM, MgCl<sub>2</sub> (500 mM)) was used. Details regarding the reaction conditions, processing, and data acquisition are described in Supplementary Information Section 1.13.

## Supplementary Information

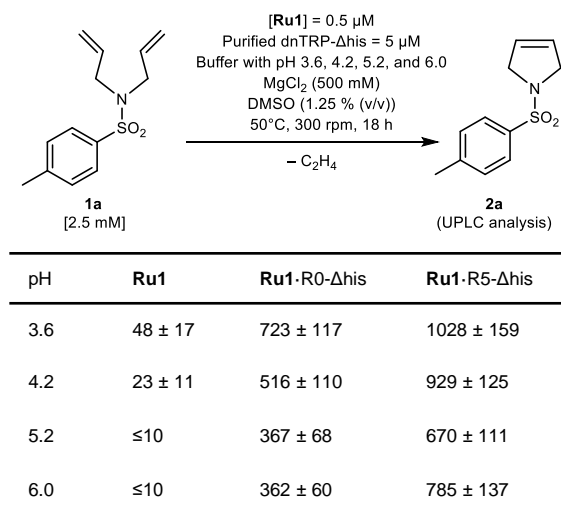

### 2.11. Supplementary Fig. 11. RCM of substrate **1a** by Ru1 and Ru1-dnTRPs at 50 °C and different pHs.

**a.** Turnover number (TON) of the free cofactor **Ru1** and **Ru1**·dnTRP-ΔHis in the presence of substrate **1a** at pH 3.6, 4.2, 5.2 and 6.0 at 50 °C. At pH 3.6, 4.2 and 5.2, NaOAc buffer (100 mM, MgCl<sub>2</sub> (500 mM)) was used. At pH 6.0, MES buffer (100 mM, MgCl<sub>2</sub> (500 mM)) was used. TON is displayed as mean values ± standard deviations of three replicates (n = 3). The replicates were independently performed using the same stock of each purified dnTRP-ΔHis. Details regarding the reaction conditions, processing, and data acquisition are described in Supplementary Information, Section 1.13.

## Supplementary Information

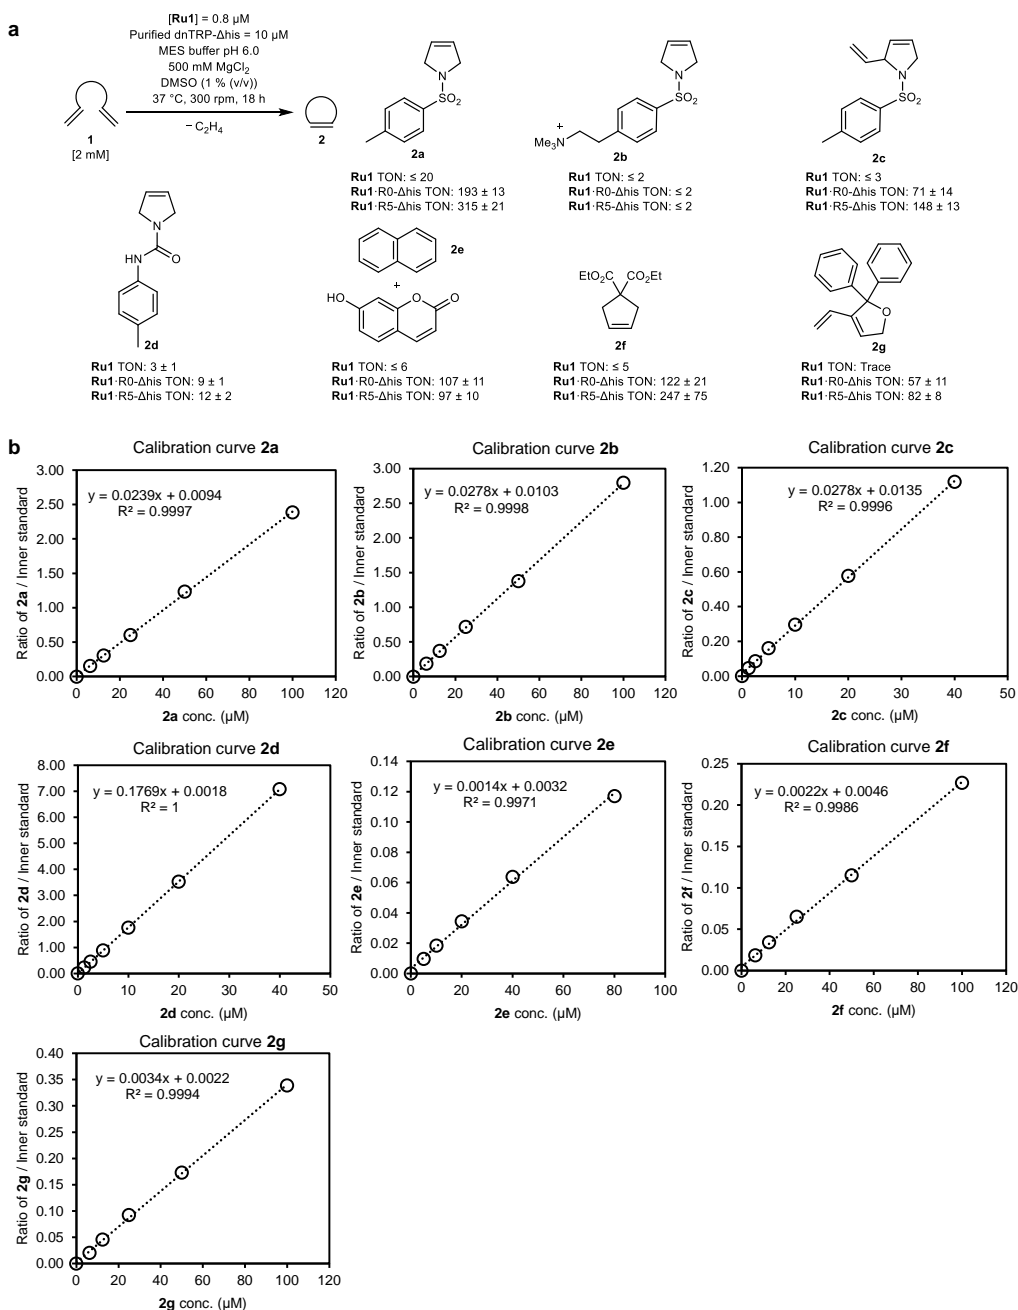

### 2.12. Supplementary Fig. 12. Comparison of RCM performance for different substrates catalyzed by Ru1 and Ru1-dnTRPs- $\Delta$ His ArMs.

**a** RCM product structures **2a-g** and corresponding TONs for ring-closing metathesis catalyzed by **Ru1** and **Ru1-dnTRPs**. **b**. Calibration curves for cyclized products **2a**, **2b**, **2c**, **2d**, **2e**, **2f**, and **2g** for the TON quantification. Data in **a** is displayed as mean values  $\pm$  standard deviations of three replicates ( $n = 3$ ). The replicates were independently performed using the same stock of each purified dnTRP- $\Delta$ His.

## Supplementary Information

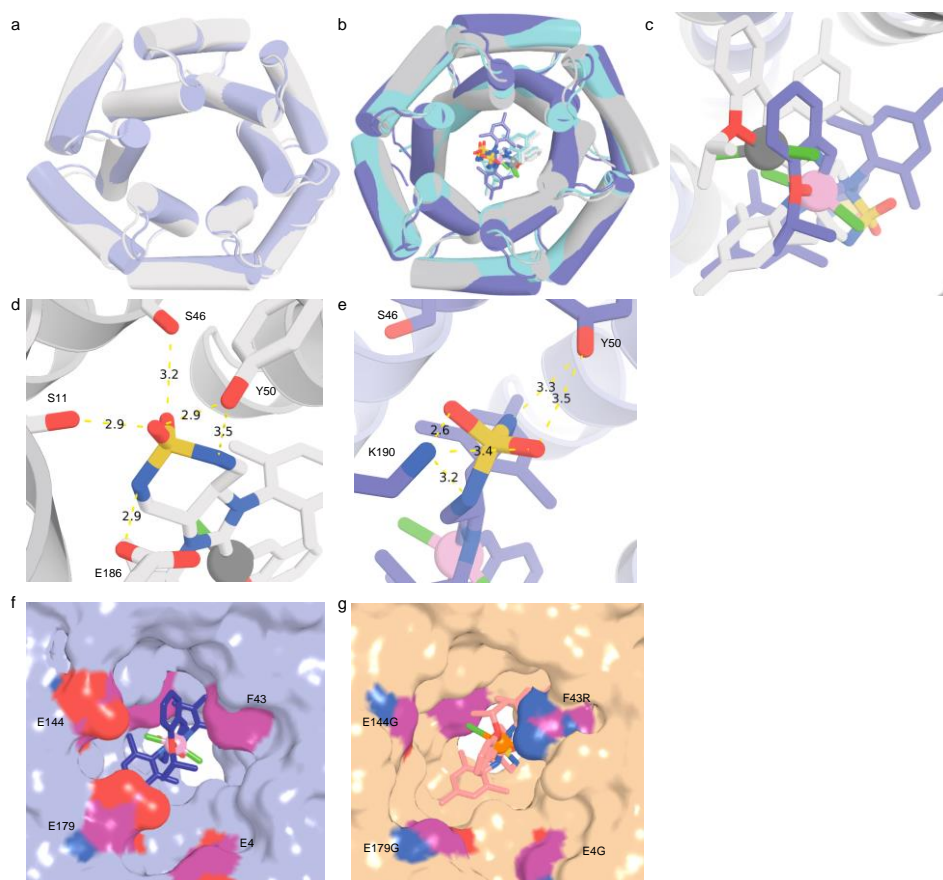

### 2.13. Supplementary Fig. 13. Structural characterization of Ru1-dnTRPs.

**a** Overlay of *apo* structures of dnTRP\_R0 (design model: gray; X-ray structure: purple). The root mean square deviation (RMSD) of C $\alpha$  atoms between these two structures was computed at 1.6 Å. **b** Back view (i.e. the side with the narrower cavity opening) of the overlay of the design model of Ru1-dnTRP\_18 (gray, ruthenium: gray sphere), Rosetta-relaxed AF2 prediction of Ru1-R0-Δhis (cyan, ruthenium: blue sphere), and the X-ray structure of Ru1-R0-Δhis (purple, ruthenium: pink sphere). Helices in the protein scaffolds are displayed as cylinders. The C $\alpha$  RMSD between these three structures ranges from 1.02 to 1.68 Å. **c** An expanded view highlights the positions of the Ru1 cofactor within cavities of the Ru1-dnTRP\_18 design model (gray) and Ru1-R0-Δhis X-ray (purple) structure. The ruthenium atoms in Ru1-dnTRP\_18 (computed) and Ru1-R0-Δhis are presented as dark gray and pink spheres, respectively. A distance of 3.4 Å is determined between the computed and X-ray position of the Ru ion. **d** Possible hydrogen bond contacts are predicted between the sulfamide moiety in Ru1 and residues (S11, S46, Y50, and E186) in dnTRP\_18 (computational model). **e** Tentative hydrogen bond contacts between the sulfamide moiety of Ru1 and residues Y50 and K190 in Ru1-R0-Δhis (based on the 1.9 Å resolution X-ray structure). These hydrogen bonds are presented by yellow dashed lines. **f, g** The surface view of inner cavities (the side with the wider cavity opening) in the X-ray structures of Ru1-R0-Δhis (purple) and Ru1-R5-Δhis (wheat). The amino acids (E4, F43, E144, and E179) mutated during directed evolution are highlighted in magenta.



## Supplementary Information

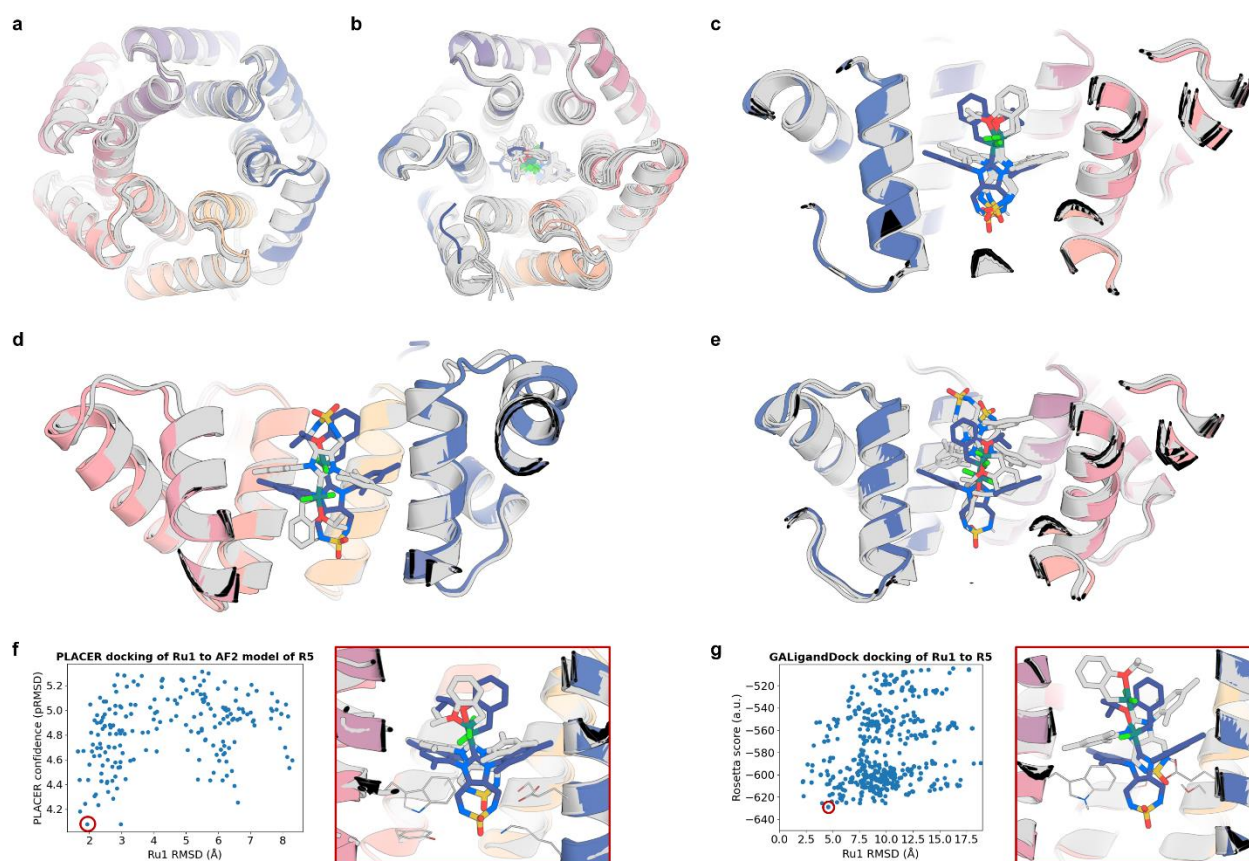

### 2.14. Supplementary Fig. 14. Structure prediction analysis of Ru1-dnTRPs.

**a** Overlay of the crystal structure of *apo* dnTRP\_R0 (colored cartoon) with Chai-1<sup>27</sup> predicted structures (five models, gray cartoon). C $\alpha$  RMSD values are within 1.0 and 1.1 Å. **b** Overlay of the crystal structure of *holo* Ru1-R5 with Chai-1-predicted structures (six models, gray cartoon and sticks). C $\alpha$  RMSD values range from 1.5 to 1.8 Å. **c** Side-view of Ru1-R5 crystal structure (colored cartoon and sticks) and Chai-1 predictions (two models, gray cartoon and sticks), revealing the predicted orientation of the cofactor. Shown are models where Chai-1 correctly predicted the geometry around the ruthenium (Ru) atom in Ru1. **d** Side-view of Ru1-R5 crystal structure (colored cartoon and sticks) and AlphaFold3<sup>28</sup> predictions (gray cartoon and sticks), showing the cofactor having been predicted in upside-down orientation. **e** Side-view of Ru1-R5 crystal structure (colored cartoon and sticks) and Boltz-1<sup>29</sup> predictions (gray cartoon and sticks), showing the cofactor having been predicted in upside-down orientation. **f** Results of docking Ru1 into AlphaFold2-predicted model of dnTRP\_R5 with PLACER<sup>30</sup>. The plot correlates Ru1 RMSD with the neural network confidence of the prediction (pRMSD score). Displayed in the red box is the highest confidence (lowest pRMSD) model (gray cartoon, sticks and lines) with Ru1 RMSD of 1.92 Å against Ru1-R5 crystal structure (colored cartoon and sticks). **g** Results of docking Ru1 into AlphaFold2-predicted model of dnTRP\_R5 with Rosetta GALigandDock<sup>31</sup>. The plot correlates Ru1 RMSD with the Rosetta energy of a given model. Displayed in the red box is the lowest energy model (gray cartoon, sticks and lines) with Ru1 RMSD of 4.57 Å against Ru1-R5 crystal structure (colored cartoon and sticks).

## Supplementary Information

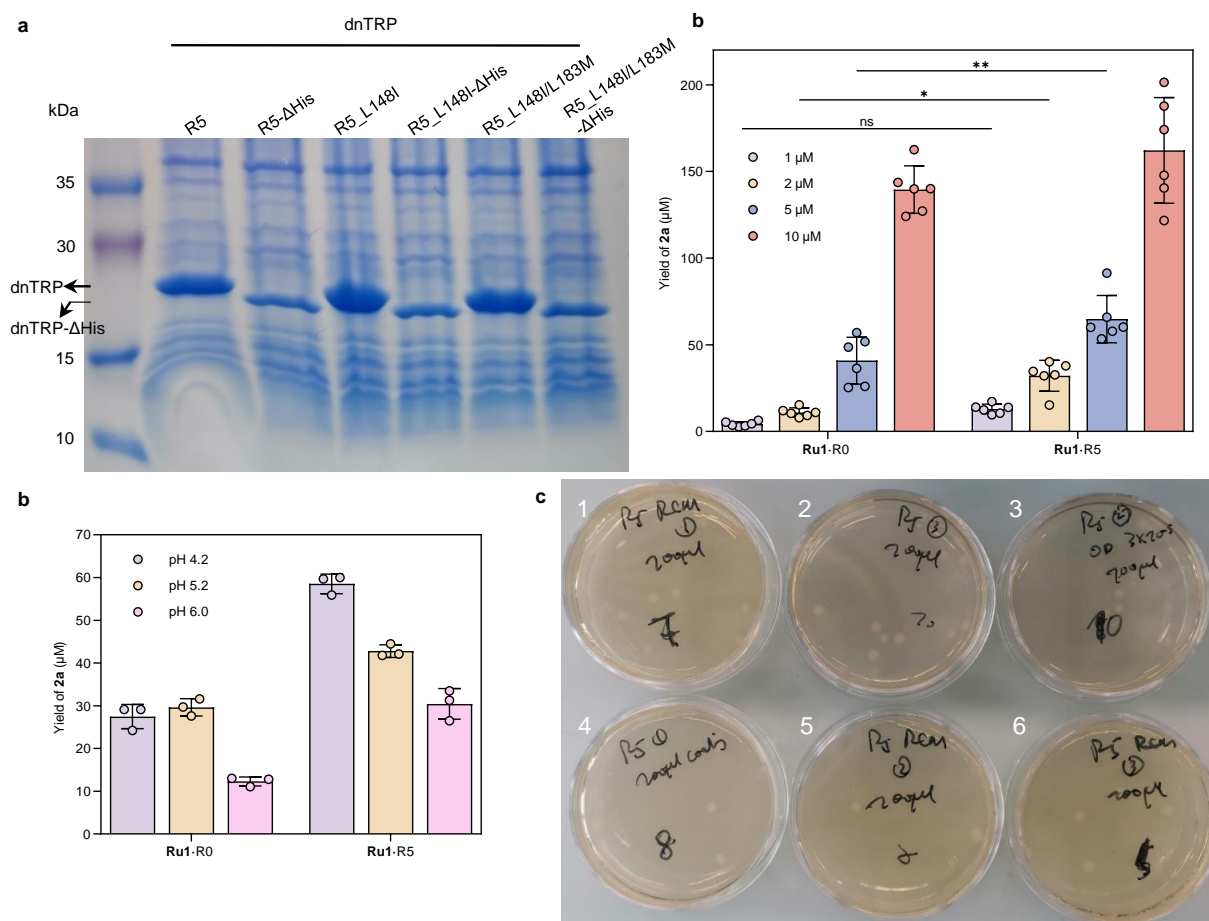

### 2.15. Supplementary Fig. 15. Expression of dnTRPs and optimization of [Ru1] for the assembly of cytoplasmic Ru1-dnTRPs and corresponding cell viability determination.

**a** Whole-cell sodium dodecyl sulfate–polyacrylamide gel electrophoresis (SDS-PAGE) of cytoplasmically expressed dnTRP\_R5, dnTRP\_R5-ΔHis and their corresponding variants. **b** Ring-closing metathesis (RCM) of substrate **1a** using the *E. coli* whole cells harboring cytoplasmic **Ru1**-dnTRPs. Varying [**Ru1**] concentrations (1, 2, 5, and 10 μM) were incubated with *E. coli* cells to assemble **Ru1**-dnTRPs. The results represent the mean of six biological replicates with error bars indicating standard deviations (n = 6). **c** RCM of substrate **1a** using the *E. coli* whole cells harboring cytoplasmic **Ru1**-dnTRPs at different pHs. The results represent the mean of three replicates with error bars indicating standard deviations (n = 3). The replicates were independently performed using the same batch of cells that expressing dnTRP\_R0 or dnTRP\_R5 (incubated with [**Ru1**] = 2 μM). **d** Photo of colonies grown on agar plates used to evaluate cell viability of *E. coli* cell, following RCM. Plates 2, 3, and 4 were plated with *E. coli* cells which were harvested after expression. Plates 1, 5, and 6 were plated with *E. coli* cells after being used for whole-cell RCM. Two-way ANOVA for **a**. \*P < 0.05, \*\*P < 0.01; ns, not significant (P > 0.05).



## Supplementary Information

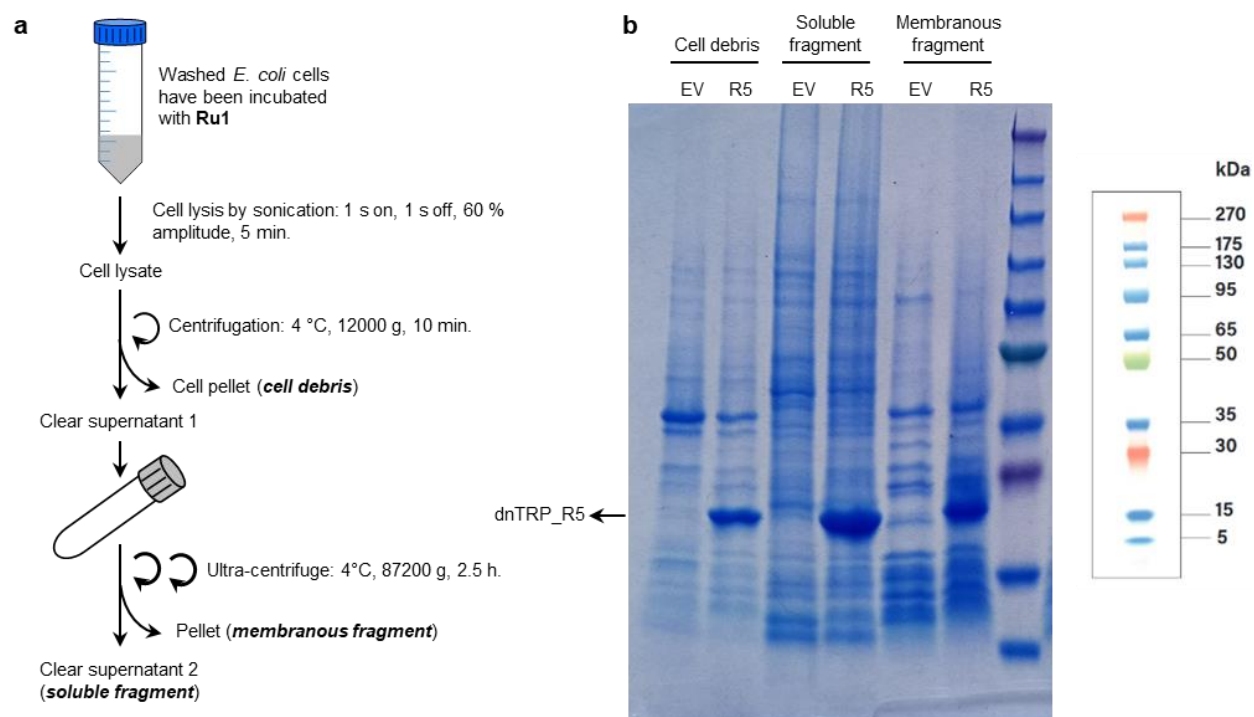

### 2.16. Supplementary Fig. 16. Fragmentation of *E. coli* cells for inductively coupled plasma mass spectrometry (ICP-MS) determination of [Ru] concentration.

**a** Schematic representation used for the preparation of cell fragments for ICP-MS analysis of [Ru].

**b** SDS-PAGE used to determine the content of dnTRP\_R5 in the prepared cell fragments in **a**.

EV: *E. coli* cells harbor the empty vector.

## Supplementary Information

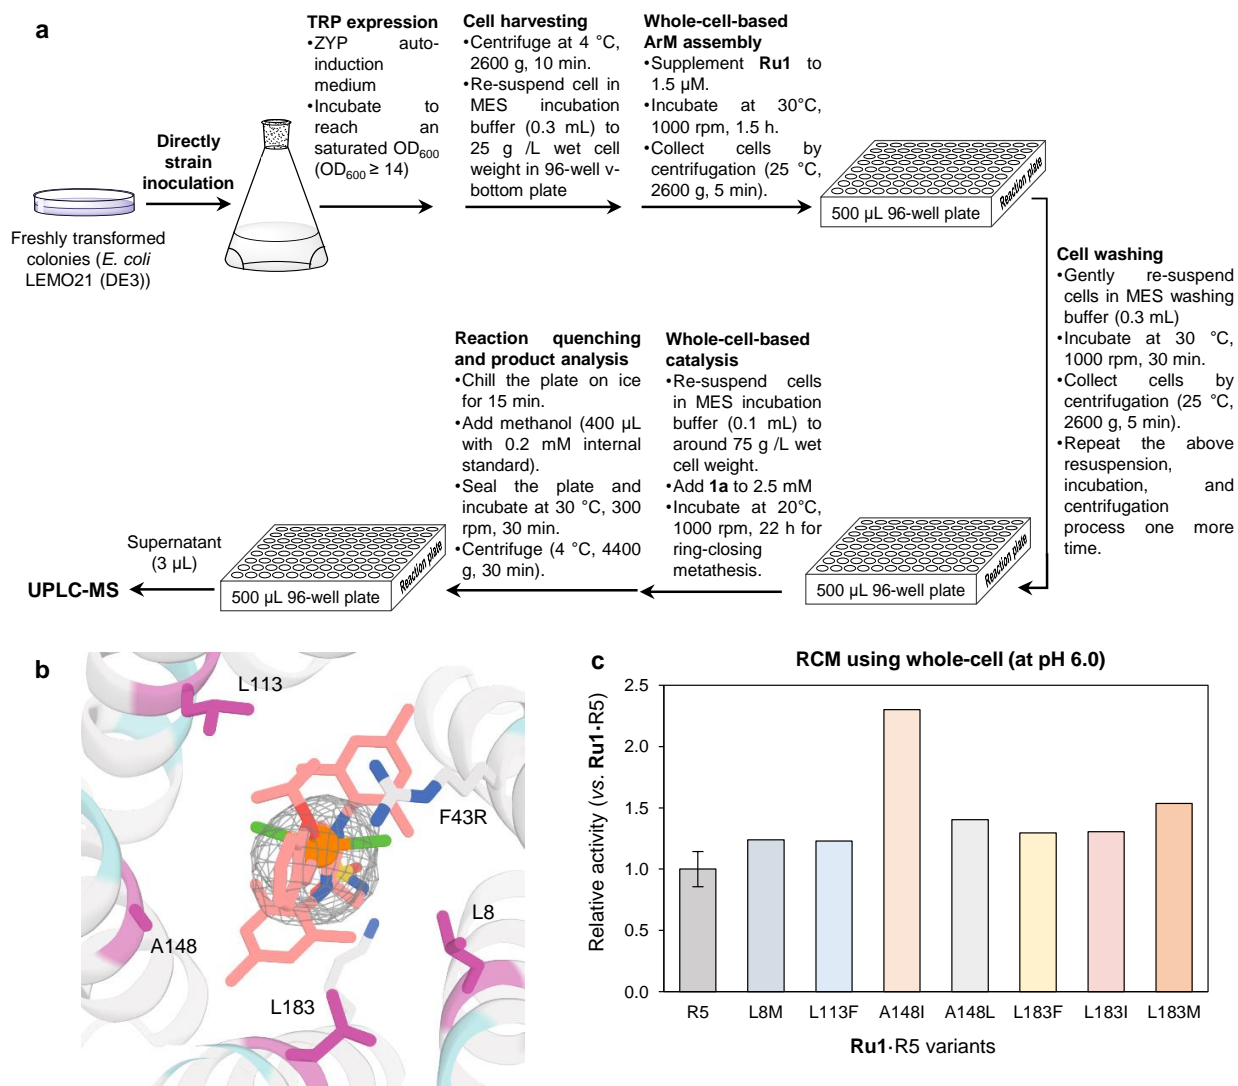

**2.17. Supplementary Fig. 17. Screening dnTRP\_R5 L8X, L113X, A148X and L183X variants at pH 6.0 for improved RCM activity in whole cells with the substrate **1a**.**

**a** Schematic representation of the assembly of the cytoplasmic artificial metathase and the subsequent activity screening in 96-well plate format. **b** Close-up view of the X-ray of **Ru1-R5- $\Delta$ his**, highlighting (magenta) the four residues L8, L113, A148, and L183 selected for randomization using seventeen amino acids (except Cys and Pro). **c** Summary of the relative RCM activity of selected variants that exhibit superior cytoplasmic activity (in the whole-cell assay) compared to the parent dnTRP\_R5. Relative activity is calculated as the TON for the cyclized product **2a** of the evolved variant divided by the TON obtained for the parent **Ru1-R5**.

## Supplementary Information

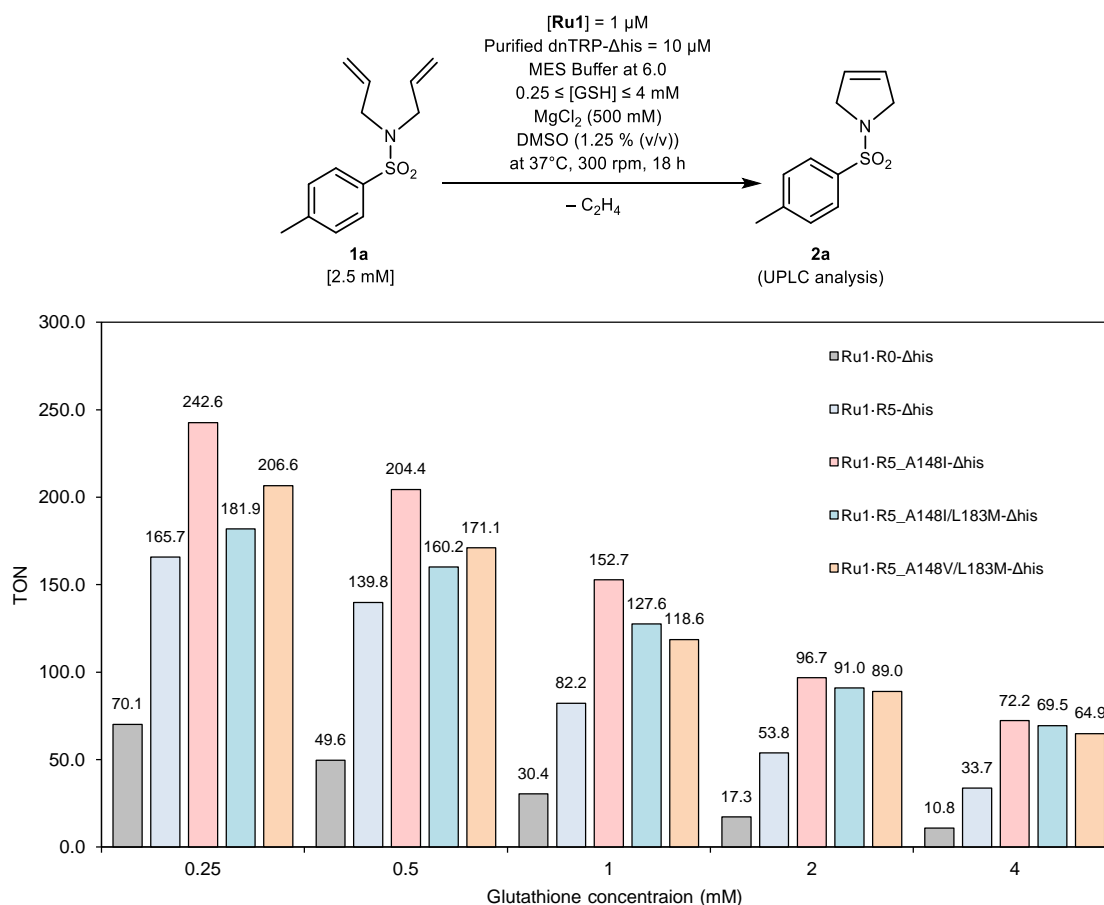

**2.18. Supplementary Fig. 18. Validation of the activity profile of variants evolved in the whole cell assay using purified dnTRP- $\Delta$ His proteins, spiked with increasing amounts of glutathione (GSH).**

## Supplementary Information

### 3. Supplementary Tables

#### 3.1. Supplementary Table 1 Primers used for site-directed (SDM) and site-saturation mutagenesis (SSM) PCRs.

The BsaI restriction sequence within the primers used for Goldengate assembly is highlighted in green.

| Name of primer    | Sequence (5'-3')                  |
|-------------------|-----------------------------------|
| Fw SDM F43W       | GAACAGGCGGCGTGGATTTTGTCTGGTTG     |
| Rev SDM F43W      | ACGCCGCCTGTTCCAAGC                |
| Fw SDM F81W       | CTTGTTGATCCTGTGGCGGCGGCCG         |
| Rev SDM F81W      | ACAGGATCAACAAGGCTTGCTCC           |
| Fw SDM F116W      | CTGTTAATCTTATGGACCGCGGCGGAATTG    |
| Rev SDM F116W     | ATAAGATTAACAGTGCTTGTCTAAAC        |
| Fw SSM E4         | CGGGTCTCGCCTGNNKCAGGCGCTGCTGATTC  |
| Rev SSM E4        | CGGGTCTCCCAGGCTCACGCCAG           |
| Fw SSM Q5         | CGGGTCTCGCCTGGAANNKGCCTGCTGATTC   |
| Rev SSM Q5        | CGGGTCTCCCAGGCTCACGCCAG           |
| Fw SSM E39        | CGGGTCTCTCAGCTTGNNKCAGGCGGCGTTTAT |
| Fw SSM E39 (F43R) | CGGGTCTCACAGCTTGNNKCAGGCGGCCGA    |
| Rev SSM E39       | CGGGTCTCAGCTGACGCCAGTTTGG         |
| Fw SSM F43        | CGGGTCTCAGGCGGCGNNKATTTTGTCTGGTTG |
| Rev SSM F43       | CGGGTCTCCCGCCTGTTCCAAGCTGAC       |
| Fw SSM Q75        | CGGGTCTCCGTTGGAGNNKGCCTTGTTGATCC  |
| Rev SSM Q75       | CGGGTCTCCCAACGAAACACCCAACTTC      |
| Fw SSM L78        | CGGGTCTCAAGCCTTGNNKATCCTGTTTGCG   |
| Rev SSM L78       | CGGGTCTCAGGCTTGCTCCAACGAAAC       |
| Fw SSM E109       | GTGAGTTTANNKCAAGCACTGTTAATCTTA    |
| Rev SSM E109      | GTGCTTGMNNTAACTCACACCCAG          |
| Fw SSM L113       | CGGTCTCAAGCACTGNNKATCTTATTTACC    |
| Rev SSM L113      | CGGTCTCGTGCTTGTTCTAAACTCACA       |
| Fw SSM E144       | CGGGTCTCTTAGTCTGNNKCAGGCGCAGG     |
| Rev SSM E144      | CGGGTCTCGACTAACGCCTAATTCGTCTTC    |
| Fw SSM A148       | CGGTCTCGGCGCAGNNKATTCTGGTGGT      |
| Rev SSM A148      | CGGTCTCGCGCCTGCTCCAGACTAACG       |
| Fw SSM E179       | GTCTCGTTANNKCAAGCTTTGCTCATC       |
| Rev SSM E179      | CAAAGCTTGMNNTAACGAGACACCGAG       |
| Fw SSM Q180       | GGGTCTCCGTTAGAGNNKGCCTTGCTCATCC   |
| Rev SSM Q180      | CGGGTCTCCTAACGAGACACCGAGCTTCG     |
| Fw SSM L183       | CGGTCTCAAGCTTTGNNKATCCTGGAAGTG    |
| Rev SSM I183      | CGGTCTCAAGCTTGCTCTAACGAGAC        |

## Supplementary Information

### 3.2. Supplementary Table 2 Primers used for error-prone PCR and fragment shuffling.

The *Bsa*I restriction sequence within the primers used for Goldengate assembly is highlighted in green.

| Name of primer            | Sequence (5'-3')                |
|---------------------------|---------------------------------|
| Fw epPCR insert           | ATGGTCTCTAAGGTGGCGGGTCTG        |
| Rev epPCR insert          | TAGGTCTCTGTGGTGCTCGAGTTAGC      |
| Fw epPCR vector backbone  | TAGGTCTCTCCACCACCACCACCACT      |
| Rev epPCR vector backbone | TAGGTCTCACCTTGAAAATACAGATTTTCGC |
| Fw Fra1                   | GAGATATACATATGGGCCATCATCACCAC   |
| Fw Fra2                   | GTTAAAAACCAAACCTGGGCGTCAGC      |
| Fw Fra3                   | CTTGTTGATCCTGTTTGCGGCG          |
| Fw Fra4                   | GTACTACGGTTGAGGAAGCAGTG         |
| Fw Fra5                   | CTGAAATTAAAGACGAAGCTCGGTGTC     |
| Fw Backbone               | GAGATCCGGCTGCTAACAAGC           |
| Rev Fra1                  | CGCCAGTTTGGTTTTTAACCATAACG      |
| Rev Fra2                  | CGCCGCAAACAGGATCAACAAG          |
| Rev Fra3                  | ACTGCTTCCTCAACCGTAGTAC          |
| Rev Fra4                  | ACCGAGCTTCGTCTTTAATTTTCAGG      |
| Rev Fra5                  | TTGTTAGCAGCCGGATCTCAGTG         |
| Rev Backbone              | GATGGCCCATATGTATATCTCCTTCTTAA   |

### 3.3. Supplementary Table 3 Primers used for generation of L8X, L113X, A148X, L183X and their corresponding recombined variants (X represents any amino acid residues except cysteine and proline).

| Name of primer | Sequence (5'-3')              |
|----------------|-------------------------------|
| Fw L8A (E4G)   | GGCAGGCGCTGGCGATTCTGAGCGTGGC  |
| Fw L8D (E4G)   | GGCAGGCGCTGGATATTCTGAGCGTGGCC |
| Fw L8E (E4G)   | GGCAGGCGCTGGAAATTCTGAGCGTGGCC |
| Fw L8F (E4G)   | GGCAGGCGCTGTTTATTCTGAGCGTGGCC |
| Fw L8G (E4G)   | GGCAGGCGCTGGGGATTCTGAGCGTGGCC |
| Fw L8H (E4G)   | GGCAGGCGCTGCATATTCTGAGCGTGGCC |
| Fw L8I (E4G)   | GGCAGGCGCTGATTATTCTGAGCGTGGCC |
| Fw L8K (E4G)   | GGCAGGCGCTGAAAATTCTGAGCGTGGCC |
| Fw L8M (E4G)   | GGCAGGCGCTGATGATTCTGAGCGTG    |
| Fw L8N (E4G)   | GGCAGGCGCTGAACATTCTGAGCGTGGCC |
| Fw L8Q (E4G)   | GGCAGGCGCTGCAGATTCTGAGCGTG    |
| Fw L8R (E4G)   | GGCAGGCGCTGCGTATTCTGAGCGTGGCC |
| Fw L8S (E4G)   | GGCAGGCGCTGAGCATTCTGAGCGTGGCC |
| Fw L8T (E4G)   | GGCAGGCGCTGACCATTCTGAGCGTGGCC |
| Fw L8V (E4G)   | GGCAGGCGCTGGTGATTCTGAGCGTG    |
| Fw L8W (E4G)   | GGCAGGCGCTGTGGATTCTGAGCGTGGCC |

## Supplementary Information

---

|                           |                                  |
|---------------------------|----------------------------------|
| Fw L8Y (E4G)              | GGCAGGCGCTGTATATTCTGAGCGTGGCC    |
| Rev L8X general           | CAGCGCCTGCCCCAGGCTCAC            |
| Fw L113A (F116W)          | GAACAAGCACTGGCAATCTTATGGACCGCG   |
| Fw L113D (F116W)          | GAACAAGCACTGGATATCTTATGGACCGCG   |
| Fw L113E (F116W)          | GAACAAGCACTGGAAATCTTATGGACCGCG   |
| Fw L113F (F116W)          | GAACAAGCACTGTTTATCTTATGGACCGCG   |
| Fw L113G (F116W)          | GAACAAGCACTGGGAATCTTATGGACCGCG   |
| Fw L113H (F116W)          | GAACAAGCACTGCATATCTTATGGACCGCG   |
| Fw L113I (F116W)          | GAACAAGCACTGATTATCTTATGGACCGCG   |
| Fw L113K (F116W)          | GAACAAGCACTGAAAATCTTATGGACCGCG   |
| Fw L113M (F116W)          | GAACAAGCACTGATGATCTTATGGACCGCG   |
| Fw L113N (F116W)          | GAACAAGCACTGAACATCTTATGGACCGCG   |
| Fw L113Q (F116W)          | GAACAAGCACTGCAGATCTTATGGACCGCG   |
| Fw L113R (F116W)          | GAACAAGCACTGCGTATCTTATGGACCGCG   |
| Fw L113S (F116W)          | GAACAAGCACTGAGCATCTTATGGACCGCG   |
| Fw L113T (F116W)          | GAACAAGCACTGACCATCTTATGGACCGCG   |
| Fw L113V (F116W)          | GAACAAGCACTGGTGATCTTATGGACCGCG   |
| Fw L113W (F116W)          | GAACAAGCACTGTGGATCTTATGGACCGCG   |
| Fw L113Y (F116W)          | GAACAAGCACTGTATATCTTATGGACCGCG   |
| Rev L113X general         | CAGTGCTTGTTCTAAACTCACACC         |
| Fw A148D                  | GGCAGGCGCAGGATATTCTGGTGGTTGCC    |
| Fw A148E                  | GGCAGGCGCAGGAAATTCTGGTGGTTGCC    |
| Fw A148F                  | GGCAGGCGCAGTTTATTCTGGTGGTTGCC    |
| Fw A148G                  | GGCAGGCGCAGGGGATTCTGGTGGTTGCC    |
| Fw A148H                  | GGCAGGCGCAGCATATTCTGGTGGTTGCC    |
| Fw A148I                  | GGCAGGCGCAGATTATTCTGGTGGTTGCC    |
| Fw A148K                  | GGCAGGCGCAGAAGATTCTGGTGGTTGCC    |
| Fw A148L                  | GGCAGGCGCAGCTGATTCTGGTGGTTGCC    |
| Fw A148M                  | GGCAGGCGCAGATGATTCTGGTGGTTGCC    |
| Fw A148N                  | GGCAGGCGCAGAACATTCTGGTGGTTGCC    |
| Fw A148Q                  | GGCAGGCGCAGCAGATTCTGGTGGTTGCC    |
| Fw A148R                  | GGCAGGCGCAGCGTATTCTGGTGGTTGCCG   |
| Fw A148S                  | GGCAGGCGCAGAGCATTCTGGTGGTTGCCG   |
| Fw A148T                  | GGCAGGCGCAGACCATTCTGGTGGTTGCCG   |
| Fw A148V                  | GGCAGGCGCAGGTTATTCTGGTGGTTGCCG   |
| Fw A148W                  | GGCAGGCGCAGTGGATTCTGGTGGTTGCCG   |
| Fw A148Y                  | GGCAGGCGCAGTATATTCTGGTGGTTGCCG   |
| Rev A148X (E144G) general | CTGCGCCTGCCCCAGACTAACG           |
| Fw L183A                  | GGACAAGCTTTGGCCATCCTGGAAGTGGCGG  |
| Fw L183D                  | GGACAAGCTTTGGATATCCTGGAAGTGGCGG  |
| Fw L183E                  | GGACAAGCTTTGGAAATCCTGGAAGTGGCGG  |
| Fw L183F                  | GGACAAGCTTTGTTATCCTGGAAGTGGCG    |
| Fw L183G                  | GGACAAGCTTTGGGCATCCTGGAAGTGGCGG  |
| Fw L183H                  | GGACAAGCTTTGCACATCCTGGAAGTGGC    |
| Fw L183I                  | GGACAAGCTTTGATCATCCTGGAAGTGGC    |
| Fw L183K                  | GGACAAGCTTTGAAAATCCTGGAAGTGGCGGC |

---

## Supplementary Information

---

|                           |                                  |
|---------------------------|----------------------------------|
| Fw L183M                  | GGACAAGCTTTGATGATCCTGGAAGTGGCGG  |
| Fw L183N                  | GGACAAGCTTTGAACATCCTGGAAGTGGCGG  |
| Fw L183Q                  | GGACAAGCTTTGCAGATCCTGGAAGTGGCGG  |
| Fw L183R                  | GGACAAGCTTTGCGTATCCTGGAAGTGGCGG  |
| Fw L183S                  | GGACAAGCTTTGAGCATCCTGGAAGTGGCGG  |
| Fw L183T                  | GGACAAGCTTTGACCATCCTGGAAGTGGCGG  |
| Fw L183V                  | GGACAAGCTTTGGTCATCCTGGAAGTGGCG   |
| Fw L183W                  | GGACAAGCTTTGTGGATCCTGGAAGTGGCGGC |
| Fw L183Y                  | GGACAAGCTTTGTATATCCTGGAAGTGGCGGC |
| Rev L183X (E179G) general | CAAAGCTTGTCTAACGAGACAC           |

---

## Supplementary Information

### 3.4. Table S4. The data has been deposited under PDB: 9GVF, 8S6P, and 9H3C.

| PDB                                                                                | 9GVF                                       | 8S6P                                       | 9H3C                                        |
|------------------------------------------------------------------------------------|--------------------------------------------|--------------------------------------------|---------------------------------------------|
| <b>Data Processing Statistics</b>                                                  |                                            |                                            |                                             |
| Resolution Range (Å)                                                               | 40.42 -1.60 (1.65-1.60)                    | 45.10-2.90 (45.10-2.90)                    | 73.50-2.90 (3.00-2.90)                      |
| Cell Parameters<br>- a, b, c (Å)<br>- $\alpha$ , $\beta$ , $\gamma$ (°)            | 36.28, 60.38, 54.52<br>90.00, 93.42, 90.00 | 53.17, 85.14, 90.24<br>90.00, 90.00, 90.00 | 91.28, 91.28, 123.95<br>90.00, 90.00, 90.00 |
| Space group                                                                        | P 1 21 1                                   | I 2 2 2                                    | I 4 <sub>1</sub> 2 2                        |
| Total reflections                                                                  | 104850 (5258)                              | 127544 (127544)                            | 147491 (15393)                              |
| Unique reflections                                                                 | 30949 (1519)                               | 4786 (4786)                                | 5750 (598)                                  |
| Rmerge (%)                                                                         | 0.032 (0.359)                              | 0.1293 (0.1293)                            | 14.7 (44.4)                                 |
| Multiplicity                                                                       | 3.4 (3.5)                                  | 26.6 (26.6)                                | 25.7 (25.7)                                 |
| Mean I/Sig(I)                                                                      | 12.9 (2.4)                                 | 10.79 (10.79)                              | 15.1 (0.63)                                 |
| Completeness (%)                                                                   | 99.6 (99.8)                                | 99.64 (99.64)                              | 93.8 (99.0)                                 |
| CC (1/2)                                                                           | 0.998 (0.875)                              | 1.00 (1.00)                                | 1.00 (0.543)                                |
| <b>Structure Refinement Statistics</b>                                             |                                            |                                            |                                             |
| R <sub>work</sub> /R <sub>free</sub>                                               | 0.20/0.25                                  | 0.26/0.32                                  | 0.25/0.32                                   |
| RMS deviation<br>-Bond length (Å)<br>-Bond angles (°)<br>-Ramachandran favored (%) | 0.011<br>1.81<br>99.52                     | 0.008<br>1.75<br>98.57                     | 0.081<br>1.82<br>97.7                       |
| Average B-factors (Å <sup>2</sup> )<br>-Protein<br>-Ligands                        | 25                                         | 143.30<br>141.57<br>205.33                 | 123<br>125                                  |



# Supplementary Information

## 4. Appendix

### 4.1. DNA and corresponding protein sequence of the dnTRP designs.

The DNA sequences (including 5'-terminal hexa-histidine, TEV protease cleavage site, and linkers) are labeled in light red. The exact DNA sequences of the dnTRP designs are highlighted in bold. The protein sequences (including N-terminal hexa-histidine and TEV protease cleavage sequence) are labeled in green. The exact protein sequences of the dnTRP designs are highlighted in bold.

| Name of dnTRP | DNA/protein sequence                                                                                                                                                                                                                                                                                                                                                                                                                                                                                                                                                                                                                                                                                                                                                                                                                                                                                                                                                                                                            |
|---------------|---------------------------------------------------------------------------------------------------------------------------------------------------------------------------------------------------------------------------------------------------------------------------------------------------------------------------------------------------------------------------------------------------------------------------------------------------------------------------------------------------------------------------------------------------------------------------------------------------------------------------------------------------------------------------------------------------------------------------------------------------------------------------------------------------------------------------------------------------------------------------------------------------------------------------------------------------------------------------------------------------------------------------------|
| dnTRP_01      | <p>ATGGGCCATCATCACCACCATCATGGCAGCGGCAGTGGCGAAATCTGTATTTCAAGGTGGCGGCTCGGGCGTGAGCCTG<br/> ATTGAGGCGGCGTTTGGCTGCTGACCGCGGCCAATCTGGGCACCACCGTGGAAGAAGCGGTGAAACGCGCGTTATGGTT<br/> AAAAACCAAACCTGGGTGTCAGCTTGTATCAGGCGTTTACCATTCTGAATGTGGCTGCGTATCTGGGTACACGGTAGAGGA<br/> GGCCGTTAAGCGCGCGCTGAACTGAAACGAAGTTGGGCGTTAGCCTGTTTCAGGCATTTACAGATTCTGCAGGTGGCCG<br/> CCTTTTGGGTACGACGTTGAGGAAGCTGTAAAGCGTGCCTTGAAGTTGAAGACGAAATTGGGTGTGAGTCTGGAACAG<br/> CGCTTAAAAATTCTGCTGGCAGCCGCGTCTTGGGGACGACCGTTGAGGAGGCGCTTAAGCGTGCAGTGAATTAAGAC<br/> TAAGCTCGGTGTTTCGTTGGAGCAAGCATTGCTGATCTTGCTGGTGGCGTGGCAGCTGGGGACCACTGTCGAAGAGGCAG<br/> TGTATCGCGCCCTCAAGCTCAAGACCAAGTTAGGGGTGAGTTTGAACAGGCCCTGATTATTTAGCGGCTGCGGCGCGC<br/> CTGGGGACTACGTTGAGGAGGCGCTTAAACGCGCCTTGAAGTTGAAGACGAAAGCTGGGCTAA<br/> MGHHHHHHGSGSGENLYFQGGGSGVSLIQAAFALLTAANLGTVEEAVKRALWLKTKLGVSLQAFTILNVAAYLGTVEEAVK<br/> RALKLKTKLGVSLFQAFQILQVAFLGTTVEEAVKRALKLKTKLGVSLQALKILLAAFLGTTVEEAVKRALKLKTKLGVSLQ<br/> ALLILLVAVQLGTTVEEAVYRALKLKTKLGVSLQALILIAAARLGTVEEAVKRALKLKTKLG</p> |
| dnTRP_02      | <p>ATGGGCCATCATCACCACCATCATGGCAGCGGCAGTGGCGAAATCTGTATTTCAAGGTGGTGGTTCGGGCGTGATCTGT<br/> GGCAGGCGCTGGCGATTGCGGCCCTTAGCGCGGGAACCTGGGCACCACCGTGGAAGAAGCGGTGAAACGCGCGCTGTGGC<br/> TGAAAACCAAATGGGCGTGAGCTTTGATATTGCGATCGCAATTCTGTGGGTTCAGCAAAAATTAGGTACGACCGTTGAGG<br/> AGGCGCTTAAGCGTGCCTGAACTGAAGACGAAGTTGGGTGTGAGCCTGTTACCGCGCTGCTGATTGCGCTGGTTGCC<br/> GCCATGCTGGGTACTACGTTGAAGAGGCGGTAAAGCGCGCTTGAAGCTGAAGACGAAGCTTGGTGTAGCTGGAAC<br/> AGGCATTGTTAATTCTGCTGCAGCGCGCGCAGTTGGGACGACTGTGGAGGAAGCTGTTAAACGTGCATTGAACTCAAG<br/> ACTAACTGGGGGTTTCGCTTGAAGCAAGCTCTGGAATTTCTGAGCGTGGCGCCGAGCTGGGGACGACGGTCAAGAGG<br/> CAGTGTATCGCGCCCTCAAGCTTAAACTAAGCTCGCGCTGCTCTTGGAGCAGGCCCTTGTGGATCCTGTTTGTGCTGCCA<br/> AGCTTGGTACCACTGTTGAGGAGGCGCTCAACGTGCAGTGAATTAACGAACTGGGCTAA<br/> MGHHHHHHGSGSGENLYFQGGGSGVDLWQALIAAALAEAGTTVEEAVKRALWLKTKLGVSLFQAFILNVAAYLGTVEEAVK<br/> RALKLKTKLGVSLFQAFQILQVAFLGTTVEEAVKRALKLKTKLGVSLQALKILLAAFLGTTVEEAVKRALKLKTKLGVSLQ<br/> LEILSVAELGTVEEAVYRALKLKTKLGVSLQALWILFVAALGTVEEAVKRALKLKTKLG</p>             |
| dnTRP_03      | <p>ATGGGCCATCATCACCACCATCATGGCAGCGGCAGTGGCGAAATCTGTATTTCAAGGTGGCGGCTCGGGCGTGAGCCTG<br/> CAGCAGGCGCGCTTTATTCTGATTCTGGCCGCTTTCTGGGCGCACCGTGGAAGAAGCGGTGAAACGCGCGTTGTGGTT<br/> GAAAACCAAACCTGGGCGTAAGCCTGACCATGCGCGCGCTGATTCTGAATGCGGCGGTGGAATTGGGTACGACGGTAGAG<br/> GAGGCGGTTAAGCGCGCGCTGAACTGAAACGAAGTTGGGTGTTAGTCTGGAACAGGCCCTAAAAATTTGTAGTTGCC<br/> GCAGCACTGGGTACACGTTGAGGAAGCTGTTAAACGTGCGCTCAAGTTGAAGACGAAATTGGGGGTTTCGTTGGAGCA<br/> AGCCTGAAAATTCTGCTGGCGGCTGCTTCTTGGGGACCACTGTTGAGGAGGCAGTGAAGCGTGCTTTGAAGCTGAAGA<br/> CCAAATTAGGCGTATCGTTAGAACAAGCACTGCATATTCTGTTTGTGGCCTTTCTGTTGGGCACTACGGTCGAGGAGGCAG<br/> TGTACCGCGCCTTGAATTAAGACTAACTTGGTGTGCTGCTCGGAAGTTGCGACCACTTGTGACCAACCGCGCATTTT<br/> TGGGTACTACCGTGAAGAGGCGCTAAAGCGTGCTTGAAGTTAAACGAAGCTGGGCTAA<br/> MGHHHHHHGSGSGENLYFQGGGSGVSLQQAIFILIAAFLGTTVEEAVKRALWLKTKLGVSLTIAAILNAAVELGTVEEAVK<br/> RALKLKTKLGVSLQALKILLVAAALGTVEEAVKRALKLKTKLGVSLQALKILLAAFLGTTVEEAVKRALKLKTKLGVSLQ<br/> HILFVAFLLGTTVEEAVYRALKLKTKLGVSLQALVILVAAALGTVEEAVKRALKLKTKLG</p>            |
| dnTRP_04      | <p>ATGGGCCATCATCACCACCATCATGGCAGCGGCAGTGGCGAAATCTGTATTTCAAGGTGGCGGCTCGGGCGTGAGCCTG<br/> TGGCAGGCGCTGGCGATTTTAGCGGTTGCGCGCTGCTGGGTACCACCGTTGAAGAAGCGGTGAAACGCGCGTTATGGTT<br/> AAAAACCAAACCTGGGTGTTAGCTTGAACAGGCGCAGAGCATTCTGGCGCGCGCAGCGTTTCTGGGCACCACGGTCGAG<br/> GAGGCTGTCAAGCGCGCGCTGAACTGAAACGAAGTTGGGCGTTAGCCTGGAACAAGCATTGAATATTCTGAATGTGGC<br/> CGCGCAGTTGGGACGACGGTGAAGAGGCGGTGAAACGCGCTTGAAGTTAAAGACGAAATTAGCGGTTTCGCTGTATC<br/> AGGCTTGGCAATTCTGCAGGTGGCTGCGGTTTTAGGCACTACCGTAGAGGAAGCAGTTAAGCGTGCTTGAAGCTCAAG<br/> ACCAAGCTCGGTGTGCTTTGGAGCAAGCTCTGCTGATTCTGTTTGTGCGCGCGCTTGGGTACGACTGTTGAGGAGGCC<br/> GTGTATCGCGCCCTCAAGCTGAAGACTAAATTGGGTGCTCGTTGGAGCAAGCCCTGGTGTATCCTCGCGCTGACGCTTG<br/> TTAGGGACTACGTTGAAGAGGCGCTAAAGCGTGCACTGAAATTAAGACTAACTTGGCTAA<br/> MGHHHHHHGSGSGENLYFQGGGSGVSLWQALAILAVAALLGTTVEEAVKRALWLKTKLGVSLQALQALIAAFLGTTVEEAV<br/> KRALKLKTKLGVSLQALKILLVAAALGTVEEAVKRALKLKTKLGVSLQALQALIAAFLGTTVEEAVKRALKLKTKLGVSLQ<br/> QALLILFVAAALGTVEEAVYRALKLKTKLGVSLQALVILVAAALGTVEEAVKRALKLKTKLG</p>        |
| dnTRP_06      | <p>ATGGGCCATCATCACCACCATCATGGCAGCGGCAGTGGCGAAATCTGTATTTCAAGGTGGCGGCTCGGGCGTGAGCCTG<br/> GAACAGGCGCTGCTGATTCTGCTGGTTGCGCGCATCTGGGCACCACCGTGGAAGAAGCGGTGAAACGCGCGTTATGGTT<br/> AAAAACCAAACCTGGGCGTTTCTGTTGGAGCAGGCGCCCAATCTGGCGATTGCGGCCCACTTGGGTACGACGTTGAGG<br/> AGGCCGTTAAGCGCGCGCTGAACTGAAACGAAGTTGGGTGTTTCGCTTGAAGCAAGCGTTGAATATTTAGCGGTGGCG<br/> CGCCTGCTGGGTACTACTGTGGAGGAAGCAGTGAAGCGTCTCAAGTTGAAGACGAAATTAGGTGTAGCTGCATCA<br/> GGCACTGGAAATTTAGCGCTGGCGGCCCTGTGGGAGCAGCGCTGAAGAGGCTGTTAAGCGTGCTTGAAGCTGAAGA<br/> CCAAATTTGGGCGCTCCCTTGAACAAGCGTGCAGATTTTGGCGCTCGCTATGCGTTAGGGAACACGGTCGAGGAGGCA<br/> GTGTATCGCGCTTTGAAATTAAGAACTAAGTTAGGGGTGCTTTGGAACAAGCACTGTATTTCTGCTGTTGCGGCGCAG<br/> TTAGGCACGACTGAGAGGAGGCGCTCAACGCTGCATGAAGCTTAAACCAAGCTGGGCTAA</p>                                                                                                                                                                                                                                                                |

## Supplementary Information

|          |                                                                                                                                                                                                                                                                                                                                                                                                                                                                                                                                                                                                                                                                                                                                                                                                                                                                                                                                                                                                                                      |
|----------|--------------------------------------------------------------------------------------------------------------------------------------------------------------------------------------------------------------------------------------------------------------------------------------------------------------------------------------------------------------------------------------------------------------------------------------------------------------------------------------------------------------------------------------------------------------------------------------------------------------------------------------------------------------------------------------------------------------------------------------------------------------------------------------------------------------------------------------------------------------------------------------------------------------------------------------------------------------------------------------------------------------------------------------|
|          | <p>GHHHHHHHSGSGSENLYFQGGGSGVSLSEQALLILLVAHLGTTVEEAVKRALWLKTKLGVSLSEQAQILIAAHLGTTVEEAVKR<br/> ALKLKTKLGVSLSEQALNIALVARLLGTTVEEAVKRALKLKTKLGVSLHQALEILALAAFLGTTVEEAVKRALKLKTKLGVSLSEQAV<br/> QILAVAYALGTTVEEAVYRALKLTKLGVSLSEQALYLAVAQLGTTVEEAVKRALKLTKLKG</p>                                                                                                                                                                                                                                                                                                                                                                                                                                                                                                                                                                                                                                                                                                                                                                         |
| dnTRP_07 | <p>ATGGGCCATCATCACCACCATCATGGCAGCGGCAGTGGCGAAAACTCGTATTTCAAGGTGGCGGCTCGGGCGTGAGCCTG<br/> GAACAGGCGCGCCTGGATTCTGAGCGTGCGCGCGGAAGTGGGTACCACCGTTGAAGAAGCGGTGAAACGTCGCTTATGGT<br/> TAAAAACCAAATGGGCGTCAGCTTGACCCAGGCGATCTGATTCTGCTGATTGCGGCGTATCTGGGCACACCGGTGGA<br/> GAGCGGTGTATCGCGCGCTGAAACTGAAAACGAAGCTCGGTGTGCTGGTGGTGCAGGCGCTGATTATTTTGTACCGC<br/> GGCGTCTGGGGACGACGGTTGAGGAGGCCGTTAAGCGCGCCTTGAAGTTAAAGACGAAGTTGGGTGTTTCGTTGGATC<br/> AGGCCCTGTTAATTTAGCGCGCTGTCATGGTTGGGACGAGCTGCGAAGAGGCGAGTAAAGCGTGCCTCAAGCTTAAAG<br/> ACCAATATTAGCTGTAGTCGAGCGCTGAAATCTGCAATGCTGCGAGTGGCAGTTAGGCACCTACCGCTCGAGGAAGC<br/> TGTATACCGTGCCCTAAAATTAAGACTAACTTGGCGTTTCGCTGGAAGCAAGCTCTGCAGATCTGCGCTGGCCGCCAA<br/> TTTAGTACGACTGTAGAAGAGGCCGTGAAGCGCGCATGTATCTGAAGACTAACTCGGCTAA<br/> MGHHHHHHHSGSGSENLYFQGGGSGVSLSEQAAILLSVAELGTTVEEAVKRALWLKTKLGVSLQAAILLILYAAIVGTTVEEAVYR<br/> ALKLKTKLGVSLVQAILLILTAALLGTTVEEAVKRALKLKTKLGVSLDQALLILAAAAWLKTTVEEAVKRALKLKTKLGVSLSEQAL<br/> KILHVAELGTTVEEAVYRALKLTKLGVSLSEQALQILRLAANLGTTVEEAVKRALYLKTKLG</p>   |
| dnTRP_08 | <p>ATGGGCCATCATCACCACCATCATGGCAGCGGCAGTGGCGAAAACTCGTATTTCAAGGTGGCGGCTCGGGCGTGAGCCTG<br/> TATCAGGCGCTGGAATTTCTGCTGTTGCGCGGGAAGTGGGCACCACCGTGAAGAAGCGGTGAAACGCGCGTTATGGTT<br/> AAAAACCAAATTTGGGCGTATGCTGTCATCAAGCGATTCTGATTTTCTGATCTGCGCGGATTGTGGGCACGACGGTTGAGA<br/> GGCAGTGTATCGCGCGCTGAAACTGAAAACGAAGCTCGGTGTAGTCTGGAACAGGCGATTATTTGCTGAGGTTGCGCT<br/> GATTCTGGGTACTACCGTAGAGGAAGCCGTAAAGCGCGCCTTGAAGTTGAAGACCAAGTTGGGTGTGCTGTTGGAGCAGG<br/> CCTTAAAAATCTTAATACCAGCGCGCGCTGGGAGCAGCTGGAAGGAGGCTTTGAAGCTGCGCTGAAATTTAAAGACG<br/> AAACTGGGGGTTTCGTTGAGCAAGCCGTTGATCTGCGCGAGCGCTGGTTTGGTACCCACCGGTGGAAGAGCGCT<br/> TTACCGTGCGTTAAAGCTCAAGACGAAATTAGCGCTGAGCTTGAACACAGCCCTGATTATTTTGGCGGTGGCCGCGAAAT<br/> AGGTACCAGCTGTAGAAGAGGCCGTCAACCGTGCAGTGTATCTGAAGACTAACTGGCTAA<br/> MGHHHHHHHSGSGSENLYFQGGGSGVSLYQALEILLVAELGTTVEEAVKRALWLKTKLGVSLHQAILLILYAAIVGTTVEEAVYR<br/> ALKLKTKLGVSLSEQAIYLQVALILGTTVEEAVKRALKLKTKLGVSLSEQALKILITAAALGTTVEEAVKRALKLKTKLGVSLSEQAVLI<br/> LAAWFLGTTVEEAVYRALKLTKLGVSLSEQALILAVAALGTTVEEAVKRALYLKTKLG</p>   |
| dnTRP_09 | <p>ATGGGCCATCATCACCACCATCATGGCAGCGGCAGTGGCGAAAACTCGTATTTCAAGGTGGCGGCTCGGGCGTGAGCCTG<br/> TATCAGGCGCGCGCATTTTACGGTTGCGCGAGCGCTGGGTACCACCGTTGAAGAAGCGGTGAAACGTCGCTTATGGTT<br/> AAAAACCAAATGCGCGCTGAGCTTGAACAGGCGATTAGATTCTGCGCGACCGCGCGCTTCTGGGCACACCGGTGGA<br/> GAGGCGAGTGTATCGCGCGCTGAACTGAAAACGAAGTTGGGCGTTAGTCTGGAACAGGCGCTGAGCATTTCTGGTGGGCG<br/> GTGGCTGTTGGGACGACGCGTTGAGGAGGCGCTTAAGCGCGCTTGAAGTTAAAGACGAAATTTGGGTGTTTCGTTGGAGC<br/> AAGCACTGCAGATTCTGCAGGTGGCGCTTCTTGGGTACGACCGTGGAGGAAGCAGTAAAGCGTGCCTGAAATTTAAAG<br/> ACTAACTTGGCGTCTCTTGAACAAGCCCTGCTGATTCTGTTTGGGCGCAATTTGGGACGACTGTGAAGAGGCT<br/> GTTTACCGTGCACTGAAGTTGAAAACAGCTCGGTGTGAGTTTGGAGCAAGCGCTGATATTTTGGCGATTGCGCGCGAA<br/> GCGGGGACCACTGTAGAGGAGGCCGTCAAACGCGCTTTATATCTGAAGACTAAGTTAGGCTAA<br/> MGHHHHHHHSGSGSENLYFQGGGSGVSLYQAAAILAVAAALGTTVEEAVKRALWLKTKLGVSLSEQAQILATAAFLGTTVEEAVY<br/> RALKLKTKLGVSLSEQALSILVVAWLLGTTVEEAVKRALKLKTKLGVSLSEQALQILVAAFLGTTVEEAVKRALKLKTKLGVSLSEQ<br/> ALLILFVAANLGTTVEEAVYRALKLTKLGVSLSEQALILAIAREAGTTVEEAVKRALYLKTKLG</p>  |
| dnTRP_10 | <p>ATGGGCCATCATCACCACCATCATGGCAGCGGCAGTGGCGAAAACTCGTATTTCAAGGTGGCGGCTCGGGCGTGAGCCTG<br/> GAACAGGCGCTGATGTTTTAGCGCTGGCGCGCTGCTGGGACCAACCGTGAAGAAGCGGTGAAACGCGCGTTATGGTT<br/> AAAAACCAAATGCGCGCTTACCTGAAACAGGCGCTGTTGATTGCGCGACCGCGCGGAATTTGGGCACGACGGTTGAA<br/> GAGGCGGTTAAACGCGCGCTGAACTGAAAACGAAGTTGGGTGTAGTCTGTTTACGCGCGCGTTGATTCTGCTGCTGTTG<br/> GGCAAAATTTGGTACGACTGTGAGGAGGCGTGAAGCGTGCCTCAAGCTCAAGACGAAATTTAGGTGTTTCTGGTAGC<br/> AAGCCCTGGCGATTCTGTATATTGACGCGCAGTTAGGCACTACCGTTGAGGAAGCCGTCAAACGTCGCTCTCAAGTTAAAGA<br/> CTAACTGCGCGCTCAGTTTGAACAGGCGCTTGTGATTGTCGGGTGGCTGCGCGCTGGGTACCACCGTAGAGGAGGCA<br/> GTGTATCGCGCTTGAAGCTGAAGACCAAGCTCGGTGTGAGTCTTGAAGACGCTGCTGATTCTTGGTTGCGGCCCAT<br/> CTGGGACTACGGTGGAGGAGGCCGTTAAGCGTGCAGTGAATTTAAAGACCAAGCTCGGCTAA<br/> MGHHHHHHHSGSGSENLYFQGGGSGVSLSEQALNLLAAALGTTVEEAVKRALWLKTKLGVSLSEQALAILVAAQLGTTVEEAV<br/> KRALKLTKLGVSLDVAIVAILAAHLGTTVEEAVKRALKLKTKLGVSLSEQALILVAAQLGTTVEEAVKRALKLKTKLGVSLSEQ<br/> AFVILAVAAALGTTVEEAVYRALKLTKLGVSLSEQALVILLVAHLGTTVEEAVKRALKLKTKLG</p>      |
| dnTRP_11 | <p>ATGGGCCATCATCACCACCATCATGGCAGCGGCAGTGGCGAAAACTCGTATTTCAAGGTGGCGGCTCGGGCGTGAGCCTG<br/> GAACAGGCGCTGAATACCTTAGCGCGCGCGGCAAGTGGGCACCACTGGAAGAAGCGGTGAAACGCGCGTTATGGT<br/> TAAAAACCAAATTTGGGCGTTTCGCTTGAGCAGGCGTTGGCGATTGTTGGTTGCGGCTGCGCAGCTGGGTACGACGGTTGAA<br/> GAGGCGGTTAAACGTCGCTTGAACCTGAAAACGAAGTTGGGTGTTTCTGTTGGATGTGCGGCTGGCCATTCTGATTGACGCC<br/> GCCCATTGCGGACCACTGAGGTGAGGAGGCTGAAGCGTCTTGAAGTTAAAGACGAAATTTAGCGCTTACTGCTGCGAGC<br/> GCACTGCTGATTATTCTGCGCGGCCAATTTGGGTACCAGTGTGGAAGAGGCGAGTGAAGCGCGCCCTCAAAATTTAAAGACT<br/> AAGCTGGGCGTGTCTTAGATCAGGCTCTGAAATTTCTGAGCGTGGCGGCCAATCTGGGTACGACCGTGGAGGAAGCAGT<br/> GTATCGCGCTGATTAATTAAGACCAAGTTAGGTGTAGCTGCAACAGCGTTGATTATCTCGGAAGTGGCAGCAAACT<br/> GGGACGACGCTAGAGGAGGCCGTCAAGCGTGCATTAACAACTTAAACGAGGCTTGGCTAA<br/> MGHHHHHHHSGSGSENLYFQGGGSGVSLSEQALNLLAAALGTTVEEAVKRALWLKTKLGVSLSEQALAILVAAQLGTTVEEAV<br/> KRALKLTKLGVSLDVAIVAILAAHLGTTVEEAVKRALKLKTKLGVSLSEQALILVAAQLGTTVEEAVKRALKLKTKLGVSLDQA<br/> LKILVAAALGTTVEEAVYRALKLTKLGVSLSEQALILEVAALGTTVEEAVKRALKLKTKLG</p> |
| dnTRP_12 | <p>ATGGGCCATCATCACCACCATCATGGCAGCGGCAGTGGCGAAAACTCGTATTTCAAGGTGGCGGCTCGGGCGTGAGCCTG<br/> GAACAGGCGCTGCTGCTACCTGCTGGCGCGCGGCAAGTGGGTACCACCGTTGAAGAAGCGGTTAAACGTCGCTTATGGTT<br/> AAAAACCAAATTTGGGTGTAGCTTGGCGCGAGCTTGGCGATTTGTTTACCGCGCAACTGGGACGACCGCTGGAGG<br/> AGGCTGTGAAGCGCGCCTTGAATTTGAACGAAGCTCGGCGCTTTCGTTGGATGTGGCGGTGGCGATCTTACGCGTTGCT<br/> GCGGTGCTGGGCACCAAGCGTGAAGAGGCGCGTGAACCGCGCTGAACTGAACTAAAGTTGGGCGCTCTCCCTGGAGC<br/> AGGCGCTGGCCATTGCTGTTGCTGGCGCGCTGTTAGGTACGACTGTGGAAGAGGCTGCAAGCGTGCATTAAGCTGAAG<br/> ACCAAGTTAGGTGTAGTTTGAACAGGCTTTAAATTTCTGAGCGTGGCAGCACTTGGGCACCACTGTTGAGGAGGCC<br/> GTGTATCGCGCCTCAAGTTAAAGACGAACTTGGTGTGCTTTGGAACAGGCAATGCTGATCTCGGAAGTGGCAGCAAACT<br/> TTAGGACTACGCTGAAGAGGCCGTCAACAGTGCCTTAAACTTAAACGAGGCTTGGCTAA<br/> MGHHHHHHHSGSGSENLYFQGGGSGVSLSEQALNLLAAALGTTVEEAVKRALWLKTKLGVSLSEQALAILVAAQLGTTVEEAV<br/> KRALKLTKLGVSLDVAIVAILAAHLGTTVEEAVKRALKLKTKLGVSLSEQALILVAAQLGTTVEEAVKRALKLKTKLGVSLDQA<br/> AFKILVAAALGTTVEEAVYRALKLTKLGVSLSEQALILEVAALGTTVEEAVKRALKLKTKLG</p>            |

# Supplementary Information

|          |                                                                                                                                                                                                                                                                                                                                                                                                                                                                                                                                                                                                                                                                                                                                                                                                                                                                                                                                                                                                                                    |
|----------|------------------------------------------------------------------------------------------------------------------------------------------------------------------------------------------------------------------------------------------------------------------------------------------------------------------------------------------------------------------------------------------------------------------------------------------------------------------------------------------------------------------------------------------------------------------------------------------------------------------------------------------------------------------------------------------------------------------------------------------------------------------------------------------------------------------------------------------------------------------------------------------------------------------------------------------------------------------------------------------------------------------------------------|
| dnTRP_13 | <p>ATGGGCCATCATCACCACCATCATGGCAGCGGCAGTGGCGAAATCTGTATTTCAAGGTGGCGGCTCGGGCGTGAGCCTG<br/> GAACAGGCGCTGTGGATTTTACGCGCGCGCGCGGAACCTGGGCACCACCGTGGAAGAAGCGGTGAAACGCGCGTTATGGT<br/> TAAAAACCAAATTGGGCGTTTCTTTGAGCAGGCGGTGGCGATTTTGATTATTCGCGCGCAGCTGGGTACGACCGTTGAGG<br/> AGCGCGTTAAGCGCGCGCTGAACTGAAACGAAGTTGGGTGTTCTGTTGGATACCGCGTTTGCATTCTCGCGGTTGCCG<br/> CGCGCTTGGGCACTACGGTCTGAAGAGGCTGTAAACGTGCCTTGAAGTTGAAGACGAAATTAGGTGTCAGCCTTGAGCAA<br/> GCGCTGACCACTTCTGATTCTGGCCGCGCTGTTAGGCACGACGGTTGAGGAGGCAGTGAAGCGTGCTTTGAAATTGAAAC<br/> CAAGCTCGGTATCGCTGGAGCAGGCGTTTAAAAATCTGAGCGTGGCAGCCAATCTGGGACCACTTTGAGGAGGCGG<br/> TCTACCGCGCCCTTAAATTAAAGACCAAACCTGGGTGTGAGTCTGGAGCAAGCATTGACGATCCTGGAAGTGGCCGCAAAA<br/> CTCGGGACTACTGTGGAGGAAGCCGTAAGAGCGCGCATTAAAGCTCAAGACTAAGTTGGGCTAA<br/> MGHHHHHHGSGSGENLYFQGGSGVSLWQALWILAAAAHLGTTVEEAVKRALWLKTLGVSLEQAVAILIAAQLGTTVEEAVK<br/> RALKLKTLGVSLEQAFILAVAAAAALGTTVEEAVKRALKLKTLGVSLEQALILIAALLGTTVEEAVKRALKLKTLGVSLEQAF<br/> KILSVAANLGTVEEAVYRALKLKTLGVSLEQALILEVAALGTTVEEAVKRALKLKTLG</p>  |
| dnTRP_14 | <p>ATGGGCCATCATCACCACCATCATGGCAGCGGCAGTGGCGAAATCTGTATTTCAAGGTGGCGGCTCGGGCGTGAGCCTG<br/> GAACAGGCGCTGTATTCTGCTGCTGGTGGCGCGGAACCTGGGCACCACCGTGGAAGAAGCGGTGAAACGCGCGTTATGGT<br/> AAAAACCAAATTGGGCGTTTCTTAGAAGTGGCGCAGGCGATTCTGATTATTCGCGCGCAGCTGGGTACGACCGTTGAGG<br/> AGCGCGTAAAGCGCGCGCTGAACTGAAACGAAGTTGGGTGTTCTGTTAGAAACCGCAATGCGATTCTGAGCGGTGCGG<br/> GCGCGCTTGGGCACGACCGTTGAAGAGGCAGTTAAGCGTGCCTCAAGCTGAAGACGAAACTGGGTGTAAGTCTGCTGCA<br/> GTCCTTGGCCATTCTGCATGCCGCCGCACTGTTGGGGACTACCGTCGAGGAAGCAGTGAAGCGTGCTTTGAAATTGAAAA<br/> CTAAATTAGGGGTTAGCTTGGAGCAGGCGTTTAAAAATCTGTTGGCAGCCAATCTGGGCAGCACTGTGGAGGAGGCTG<br/> TGTATCGCGCCCTGAAGTTAAAGACTAAGCTCGGCGCTCAGTCTTGAACAAGCACTGATCATCTGGAGGTGGCTGCGAAAC<br/> TCGGTACCACTGTGGAAGAGGCGGTGAACGCGCATTGAAGCTCAAACTAAGCTGGGCTAA<br/> MGHHHHHHGSGSGENLYFQGGSGVSLWQALFILLVAELGTTVEEAVKRALWLKTLGVSLEQAVAILIAAQLGTTVEEAVK<br/> RALKLKTLGVSLEQAFILAVAAAAALGTTVEEAVKRALKLKTLGVSLEQALILIAALLGTTVEEAVKRALKLKTLGVSLEQAF<br/> KILFVAANLGTVEEAVYRALKLKTLGVSLEQALILEVAALGTTVEEAVKRALKLKTLG</p>       |
| dnTRP_15 | <p>ATGGGCCATCATCACCACCATCATGGCAGCGGCAGTGGCGAAATCTGTATTTCAAGGTGGCGGCTCGGGCGTGAGCCTGT<br/> GGCAGGCGCTGGCGATTCTGAGCGCGCGCGCGCATTGGGTACCACCGTTGAAGAAGCGGTAAACGTGCGTTATGGTTA<br/> AAAAACCAAATTGGGTGTTAGCTTGACCGAAGCGGTTGACCACTTCTGTTTGGCGCGCTATCTGGGCACCACGGTGAAGAG<br/> GCGGTGAAACGCGCGCTGAACTGAAACTGAACTGGCGGTTAGCCTGCTGCAAGCACTGCTGATTCTGCTGGTTGCAAGC<br/> GAAATTAGGCACGACGGTTGAGGAGGCGGTGAAGCGTGCTTGAAGCTGAAGACGAAAGTTGGGCGTCAGTCTGGATCAG<br/> GCCCTCTTGATTTTGTCTGTTGCGGCGGAACCTGGTACTACTGTCGAAGAGGCGAGTAAAGCGCGCCCTCAAGTTAAAGACC<br/> AAACTCGGCGGTTTCTGTTGAACAGGCACTGGTATTGCGACCGGTGGCAGCCAGCTGGGGAAGCTGGGGAAGCTGT<br/> TTATCGCGCGTTGAAATTGAAACGAAGCTCGGTGTGCTTTGGAGCAAGCGCTGTTGATCCTGGCAGCTGCGAGCGAATT<br/> GGGCACTACGGTTCGAGGAGGCGAGTCAACGCTGCTGAAATTAAGCTGAACTGAACTGGGCTAA<br/> MGHHHHHHGSGSGENLYFQGGSGVSLWQALAILSAHAHLGTTVEEAVKRALWLKTLGVSLEQALILFVAAYLGTVEEAVK<br/> RALKLKTLGVSLEQAFILAVAAAAALGTTVEEAVKRALKLKTLGVSLEQALILFVAAELGTVEEAVKRALKLKTLGVSLEQA<br/> LVIATVAAQLGTVEEAVYRALKLKTLGVSLEQALILAAASELGTVEEAVKRALKLKTLG</p>   |
| dnTRP_16 | <p>ATGGGCCATCATCACCACCATCATGGCAGCGGCAGTGGCGAAATCTGTATTTCAAGGTGGCGGCTCGGGCGTGAGCCTG<br/> GAACAGGCGCTGCAGATTCTGAGCGTGGCGCGCGCACTGGGTACCACCGTTGAAGAAGCGGTGAAACGTGCGTTATGGTT<br/> AAAAACCAAATGGGCGTCACTTGGAAACAGGCGTTGTTGATCTTGTGCGTTGCAAGCGAATTGGGCACCACGGTGAAG<br/> AGGCGGTTAAACGCGCGCTGAACTGAAACGAAGTTGGGCGTTTCTGCTTGAAGCAAGCCCTGCTGATCCTGTTTGGCGCG<br/> GCAAAATTGGGTACGACGGTTGAGGAGGCAGTCAAGCGTGCTTGAAGCTGAAGACGAAATTAGGTGTTTCTGTTGGAGCA<br/> AGCCTTGCTCATCCTGTATGTGGCGGCGGAGCTGGGGACGACCGTGGAGGAAGCTGTTAAGCGCGCTTTGAAACTCAAGA<br/> CTAAACTCGGTGTTAGCTGCTGCAAGCACTGATTATCTGGTGATTGCGGCAGAAATTAGGCACTACCGTAGAGGAGGCGAG<br/> TGTATCGCGCCTTAAATTTGAAGACCAAGCTCGGCGTATCGCTGGAAGCGCGCTTTCTGATTCTGGAAGTGGCTGCCAAGT<br/> TAGGTACTACTGTGGAGGAGGCGGTAACAGTGCAGTGAAGTTGAAGACGAAACTGGGCTAA<br/> MGHHHHHHGSGSGENLYFQGGSGVSLWQALAILSAHAHLGTTVEEAVKRALWLKTLGVSLEQALILFVAAYLGTVEEAVK<br/> RALKLKTLGVSLEQAFILAVAAAAALGTTVEEAVKRALKLKTLGVSLEQALILFVAAELGTVEEAVKRALKLKTLGVSLEQA<br/> LVIATVAAQLGTVEEAVYRALKLKTLGVSLEQALILAAASELGTVEEAVKRALKLKTLG</p> |
| dnTRP_17 | <p>ATGGGCCATCATCACCACCATCATGGCAGCGGCAGTGGCGAAATCTGTATTTCAAGGTGGCGGCTCGGGCGTGAGCCTG<br/> GAACAGGCGCTGCAGATTCTGAGCGTGGCGCGCGCACTGGGTACCACCGTTGAAGAAGCGGTGAAACGTGCGTTATGGTT<br/> AAAAACCAAATGGGCGTCACTTGGAAACAGGCGTTGTTGATCTTGTGCGTTGCAAGCGAATTGGGCACCACGGTGAAG<br/> AGGCGGTTAAACGCGCGCTGAACTGAAACGAAGTTGGGCGTTTCTGCTTGAAGCAAGCCCTGCTGATCCTGTTTGGCGCG<br/> GCAAAATTGGGTACGACGGTTGAGGAGGCAGTCAAGCGTGCTTGAAGCTGAAGACGAAATTAGGTGTTTCTGTTGGAGCA<br/> AGCCTTGCTCATCCTGTATGTGGCGGCGGAGCTGGGGACGACCGTGGAGGAAGCTGTTAAGCGCGCTTTGAAACTCAAGA<br/> CTAAACTCGGTGTTAGCTGCTGCAAGCACTGATTATCTGGTGATTGCGGCAGAAATTAGGCACTACCGTAGAGGAGGCGAG<br/> TGTATCGCGCCTTAAATTTGAAGACCAAGCTCGGCGTATCGCTGGAAGCGCGCTTTCTGATTCTGGAAGTGGCTGCCAAGT<br/> TAGGTACTACTGTGGAGGAGGCGGTAACAGTGCAGTGAAGTTGAAGACGAAACTGGGCTAA<br/> MGHHHHHHGSGSGENLYFQGGSGVSLWQALQILSVAALGTTVEEAVKRALWLKTLGVSLEQALILSVAALGTTVEEAVK<br/> RALKLKTLGVSLEQAFILFAAALGTTVEEAVKRALKLKTLGVSLEQALILFVAAELGTVEEAVKRALKLKTLGVSLEQA<br/> LILVIAELGTVEEAVYRALKLKTLGVSLEAALFLEVAALGTTVEEAVKRALKLKTLG</p>       |
| dnTRP_18 | <p>ATGGGCCATCATCACCACCATCATGGCAGCGGCAGTGGCGAAATCTGTATTTCAAGGTGGCGGCTCGGGCGTGAGCCTG<br/> GAACAGGCGCTGCTGATTCTGAGCGTGGCGCGCCCTGCTGGGTACCACCGTTGAAGAAGCGGTGAAACGTGCGTTATGGTT<br/> AAAAACCAAATGGGCGTCACTTGGAAACAGGCGCGCTTTATTTTGTGCGTTGCTGCTATCTGGGCACCACGGTGAAG<br/> AGGCTGTAAGAGCGCGCGCTGAACTGAAACGAAGTTGGGTGTTTCTGTTGGAGCAAGCCTTGTGATCCTGTTTGGCGCGG<br/> CCGCGTTGAGCAGCGCTGAGGAGGCGGTTAAGCGTGCTTGAAGCTCAAGACCAAGCTGGGTGAGTTAGAAACAA<br/> GCACTGTTAATCTTATTTACGCGGCGGAATTGGGTACTACGTTGAGGAAGCAGTGAAGCGCGCATTGAAATTGAAGACG<br/> AAATTAGGCGTTAGCTGAGGAGGCGCAGGCGATTCTGGTGGTTGCGCGCGAGTTAGGTACGACGGTAGAGGAGGCGGT<br/> GTATCGCGCCCTGAAATTAAGACGAAGCTCGGTGTCTGTTAGGCAAGCTTTGCTCATCTGGAAGTGGCGCGCAAAAT<br/> GGGTACCACTGTGGAGGAGGCTGTCAACGCGCGGTTAAACTTAAGACTAAATTAGGCTAA<br/> MGHHHHHHGSGSGENLYFQGGSGVSLWQALILSVAALLGTTVEEAVKRALWLKTLGVSLEQAFILSVAAYLGTVEEAVK<br/> RALKLKTLGVSLEQAFILFAAALGTTVEEAVKRALKLKTLGVSLEQALILFVAAELGTVEEAVKRALKLKTLGVSLEQA<br/> QAILVAAELGTVEEAVYRALKLKTLGVSLEQALILEVAALGTTVEEAVKRALKLKTLG</p>                     |

# Supplementary Information

|          |                                                                                                                                                                                                                                                                                                                                                                                                                                                                                                                                                                                                                                                                                                                                                                                                                                                                                                                                                                                                                                         |
|----------|-----------------------------------------------------------------------------------------------------------------------------------------------------------------------------------------------------------------------------------------------------------------------------------------------------------------------------------------------------------------------------------------------------------------------------------------------------------------------------------------------------------------------------------------------------------------------------------------------------------------------------------------------------------------------------------------------------------------------------------------------------------------------------------------------------------------------------------------------------------------------------------------------------------------------------------------------------------------------------------------------------------------------------------------|
| dnTRP_19 | <p>ATGGGCCATCATCACCACCATCATGGCAGCGGCAGTGGCGAAAATCTGTATTTCAAGGTGGCGGCTCGGGCGTGAGCCTG<br/> GAACAGGCGCTGCTGATTCTGAGCGTGGCCGCCCTGCTGGGTACCACCGTTGAAGAAGCGGTGAAACGTCGCTTATGGTT<br/> AAAAACCAAACTGGGTGTCAGCTTGAACAGGCGTTGTATATTTGTCTGTTGCGGCGTATCTGGGCACCACGTTGGAAGA<br/> GGCCGTTAAGCGCGCGCTGAAACTGAAAACGAAGTTGGGTGTTAGCCTGCTGCAGGCACTGTGGATTCTGTTTGGCCGCG<br/> CGAAATTAGGTACGACGGTAGAGGAGGCAAGTCAAACGCGCCTTGAAGCTGAAGACGAAGCTGGGTGTTTCGTTGGATCAG<br/> GCCTTGTGATCCTCTTCGCCGCGAGCGGAATTGGGGACTACCGTAGAAGAGGCTGTTAAACGCGCTCTCAAGTTGAAAAC<br/> AAATTGGGCGTGTGCTTGAATTTGCGAATCAGATTCTGGTGGTTGCCGCGAGTTAGGACCACTGTGCGAGGAAGCCGTT<br/> TACCGCGCCTGAAATTAAGACTAAGTTAGGCGTCTCGCTGGAGCAGGCGAATCTGATCCTGGAAGTGGCTGCCAAGTT<br/> GGGTACCACGGTTGAGGAGGCAAGTGAAGCGTGCCCTCAAATTGAAGACCAAGTTAGGCTAA<br/> MGHHHHHHGSGSGENLYFQGGGSGVSLQALLILSVAALLGTTVEEAVKRALWLKTKLGVSLQALYILSVAAYLGTVEEAVK<br/> RALKLKTKLGVSLQALWILFAAAKLGTTVEEAVKRALKLKTKLGVSLDQALLILFAAAELGTTVEEAVKRALKLKTKLGVSLQ<br/> NQILVVAELGTTVEEAVYRALKLKTKLGVSLQANLILEVAALKGTTVEEAVKRALKLKTKLG</p>  |
| dnTRP_20 | <p>ATGGGCCATCATCACCACCATCATGGCAGCGGCAGTGGCGAAAATCTGTATTTCAAGGTGGCGGCTCGGGCGTGAGCCTG<br/> TATCAGGCGCTGGCGATTCTGTATGTTGCGGCGGCCCTGGGCACCACCGTTGAAGAAGCGGTGAAACGCGCGTTATGGTT<br/> AAAAACCAAACTGGGCGTAAGCCTGCAGCAGGCGAGCCAAATTTAGCGTTAGCGGCGGTTGCGGGTACGACGTTGAG<br/> GAGGCGGTTAAACGCGCGCTGAAACTGAAAACGAAGTTGGGTGTTTCGCTGTGGCAAGCGATTATATTTGGCTGGTGGCG<br/> CTGCTGTTGGGCGCAGCTGTAGAGGAAGCCGTAAGCGTGCCCTGAAGTTGAAGACGAAATTTGGGCGTTAGTCTGGAACA<br/> GGCCCTCAAAATCTGATTGCCGCGCAGGCCCTGGGTACTACCGTTGAGGAGGCAAGTAAACGTCGTTGAAACTCAAGAC<br/> CAAATTAGGCGTTTCGTTGGAGCAAGCCCTGATTATCTGTTTGTCTGCAGCGGAAGTGGGACGACCGTAGAAGAAGCAGT<br/> GTATCGCGCCTTAAAGCTGAAGACTAAGCTCGGTGTATCTCTTACCAGGCGGCGATTATTAATGCGGTAGCGGCAAACT<br/> CGGGACCACTGTGGAGGAGGCCGTCAAACGCGCCTTGAATTAAGACTAAACTTGGCTAA<br/> MGHHHHHHGSGSGENLYFQGGGSGVSLYQALAILYVAAALGTTVEEAVKRALWLKTKLGVSLQASQILALAAVAGTTVEEAV<br/> KRALKLKTKLGVSLWQAIYIWLVALLLGTTVEEAVKRALKLKTKLGVSLQALKILIAAALGTTVEEAVKRALKLKTKLGVSLQ<br/> ALILFAAAELGTTVEEAVYRALKLKTKLGVSLYQAAILNVAALKGTTVEEAVKRALKLKTKLG</p>     |
| dnTRP_21 | <p>ATGGGCCATCATCACCACCATCATGGCAGCGGCAGTGGCGAAAATCTGTATTTCAAGGTGGCGGCTCGGGCGTGAGCCTG<br/> TATCAGGCGCTGGAAATCTGTTTGTGCGGCGGCCCTGGGCACCACCGTTGAAGAAGCGGTGAAACGCGCGTTGTGGTT<br/> GAAAACCAAACTGGGCGTTAGCCTGCAGCAGGCGCGCAAAATTTGAATTTTGCAGCGGTTGCGGGTACCACGTTGAGG<br/> AGGCCGTTAAACGCGCGCTGAAACTGAAAACGAAGCTCGCGCTCAGTCTGAGCCAGGCGATTATATTTGGCTGGTGGCG<br/> TTTCTGTTGGGACGACGCTGGAGGAAGCTGTTAAGCGTGCCCTGAAGTTGAAGACGAAGTTGGGTGTAAGTCTGGAACA<br/> GGCATTAAAAATCCTGGTGATTGCGGCTGCCTGGGTACTACCGTGCAGGAGGCAAGTAAAGCGCGCATTGAAGCTCAAGA<br/> CCAAGCTGGGGTTTCGCTTGAGCAAGCACTGCTGATTCTGGCACTGGCGTGGGTTTTAGGCACGACTGTTGAGGAGGCA<br/> GTGTATCGCGCCCTGAAGCTGAAGACCAAAATTTGGGCGTGCTGTTGTACCAGGCTGCCCTGATTATGCGGTGGCCGCGAA<br/> ATTAGGTACGACCGTAGAAGAGGCGGTCAAACGTCGCTTAAATTTGAAGACTAAACTCGGCTAA<br/> MGHHHHHHGSGSGENLYFQGGGSGVSLYQALEILFVAAALGTTVEEAVKRALWLKTKLGVSLQAAQILNFAAVAGTTVEEAV<br/> KRALKLKTKLGVSLSQAIYIWLVAFLGTTVEEAVKRALKLKTKLGVSLQALKILVIAAALGTTVEEAVKRALKLKTKLGVSLQ<br/> LLILALAWVLGTTVEEAVYRALKLKTKLGVSLYQAALINVAALKGTTVEEAVKRALKLKTKLG</p> |
| dnTRP_22 | <p>ATGGGCCATCATCACCACCATCATGGCAGCGGCAGTGGCGAAAATCTGTATTTCAAGGTGGCGGCTCGGGCGTGAGCCTG<br/> CGGCCAGGCGGCCAATATTTAGCGGTTGCGGCGGCCCTGGGTACCACCGTTGAAGAAGCGGTGAAACGTCGCTTATGG<br/> TTAAAACCAAACTGGGCGTTAGTCTGTGGCAGGCGTTTGCAGATTTATTATTAGCGGCGCGCGGGCACCAACGTTGGA<br/> AGAGGCTGTTAAGCGCGCGCTGAAACTGAAAACGAAGCTCGGTGTTAGCCTGGAACAGGCGATTGCCATTCTGGGTG<br/> GCGCGCATCTGGGGACGACGGTAGAGGAGGCCGTTAAACGCGCCTTGAAGCTGAAGACGAAGTTGGGTGTTTCGTTGG<br/> AGCAGGCGCTGTATATTCTTGCACCGCGCGCCAGTTGGGCACGACCGTCGAGGAAGCAGTGAAGCGTGCCCTCAAGTT<br/> AAAGACCAAAATAGGTGTCTCTTTGGAACAAGCCCTGTTATTTTGAAGCGGCGCGTTGGTTGGGTACTACTGTGGAGGA<br/> GGCGGTGTATCGCGCTTTGAAATTTGAAACTAAATTTGGCGTATCGCTGCATCAGGCACTGAGCATTCTGGTGGTTGCG<br/> CGAAATTTGGGCACTACCGTGGAGGAGGCCGTCAAACGCGCATTAAACTCAAGACTAAATTAGGCTAA<br/> MGHHHHHHGSGSGENLYFQGGGSGVSLRQAANILAVAAALGTTVEEAVKRALWLKTKLGVSLWQAFAILLLAAAGTTVEEAV<br/> VKRALKLKTKLGVSLQAIILWVARILGTTVEEAVKRALKLKTKLGVSLQALYILATARQLGTTVEEAVKRALKLKTKLGVSL<br/> QALFILQAARWLGTTVEEAVYRALKLKTKLGVSLHQAALVVAALKGTTVEEAVKRALKLKTKLG</p>    |

## Supplementary Information

### 4.2. Uncropped scans of all blots and gels

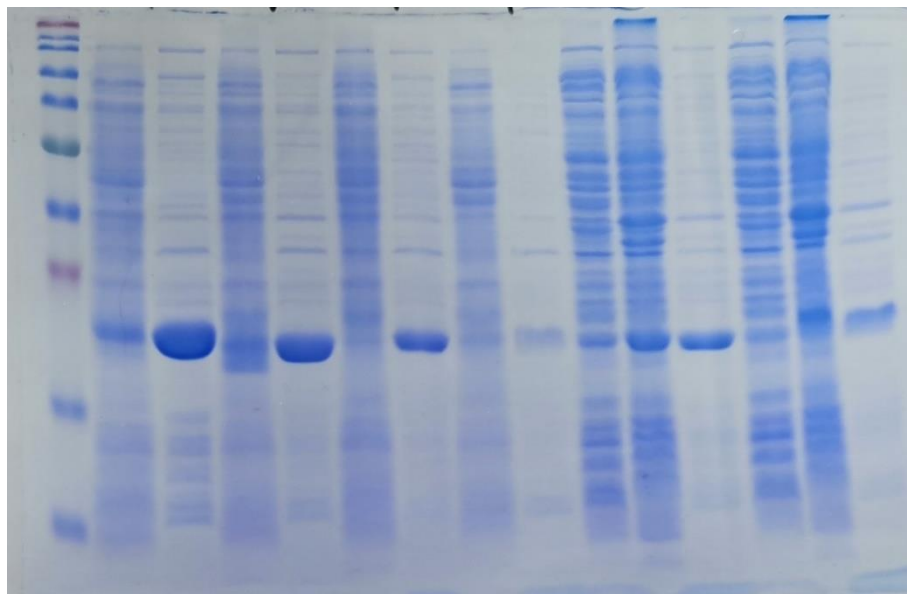

**Gel 1:** Uncropped sodium dodecyl sulfate–polyacrylamide gel electrophoresis (SDS-PAGE) gel of Supplementary Fig.2 (top, left).

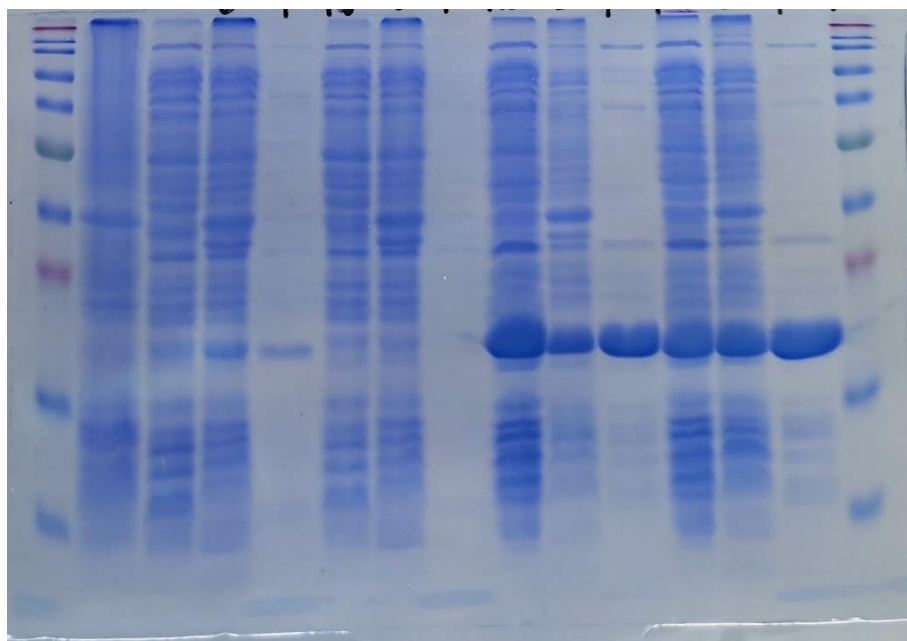

**Gel 2:** Uncropped sodium dodecyl sulfate–polyacrylamide gel electrophoresis (SDS-PAGE) gel of Supplementary Fig.2 (top, middle).

## Supplementary Information

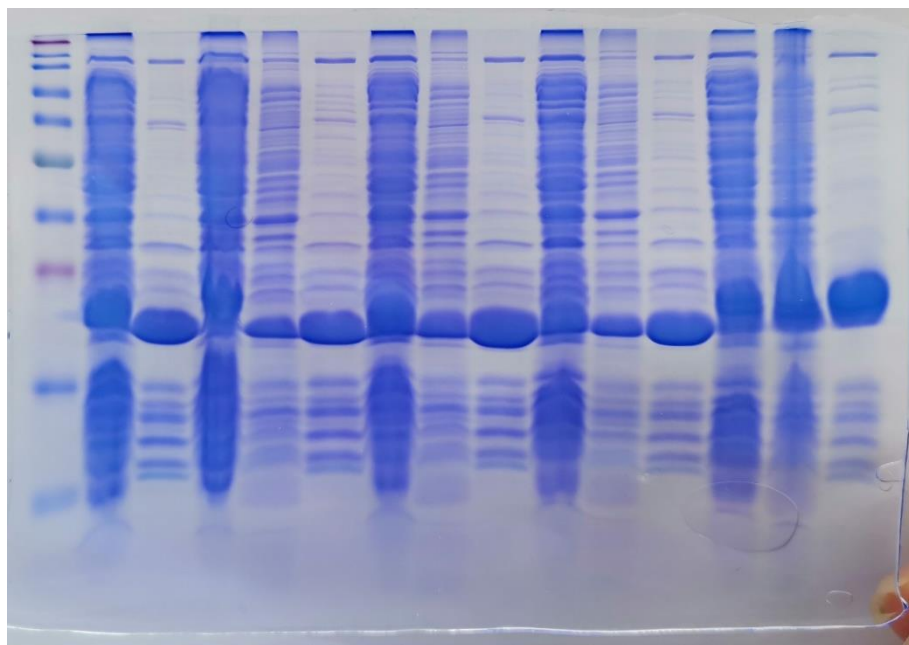

**Gel 3:** Uncropped sodium dodecyl sulfate–polyacrylamide gel electrophoresis (SDS-PAGE) gel of Supplementary Fig.2 (bottom, left).

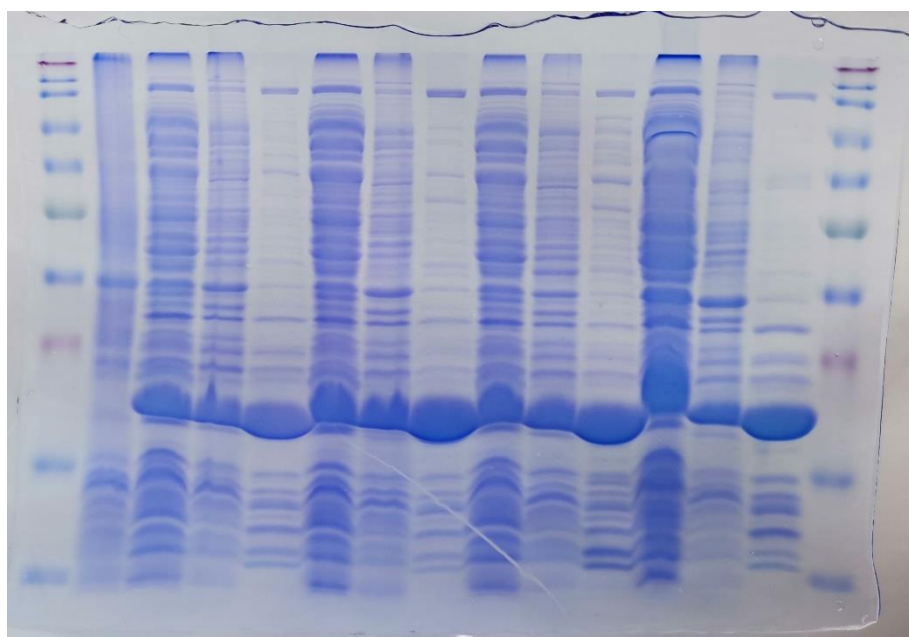

**Gel 4:** Uncropped sodium dodecyl sulfate–polyacrylamide gel electrophoresis (SDS-PAGE) gel of Supplementary Fig.2 (bottom, middle).



## Supplementary Information

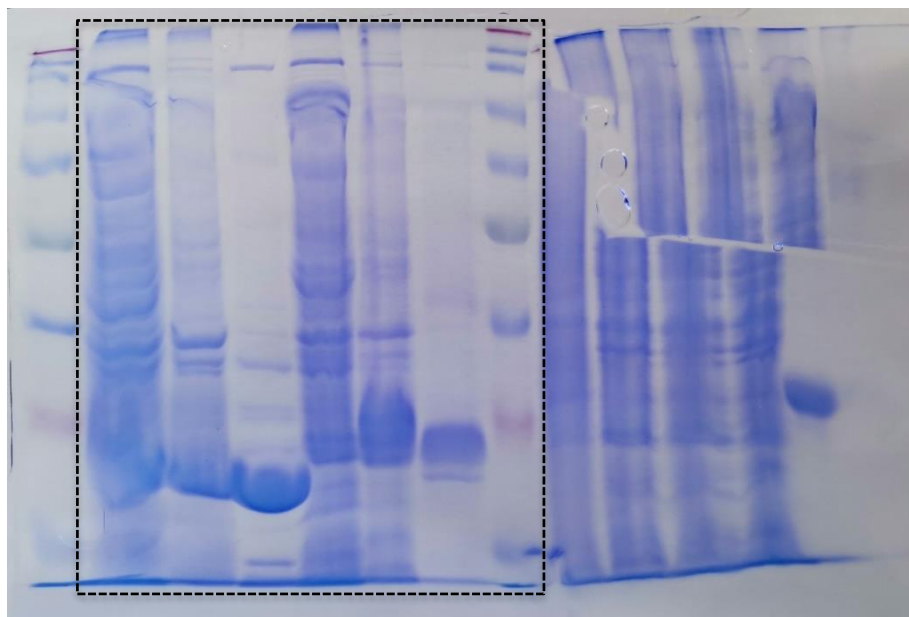

**Gel 5:** Uncropped sodium dodecyl sulfate–polyacrylamide gel electrophoresis (SDS-PAGE) gel of Supplementary Fig.2 (bottom, right). The parts displayed in Fig. 2 are highlighted in dashed rectangles.

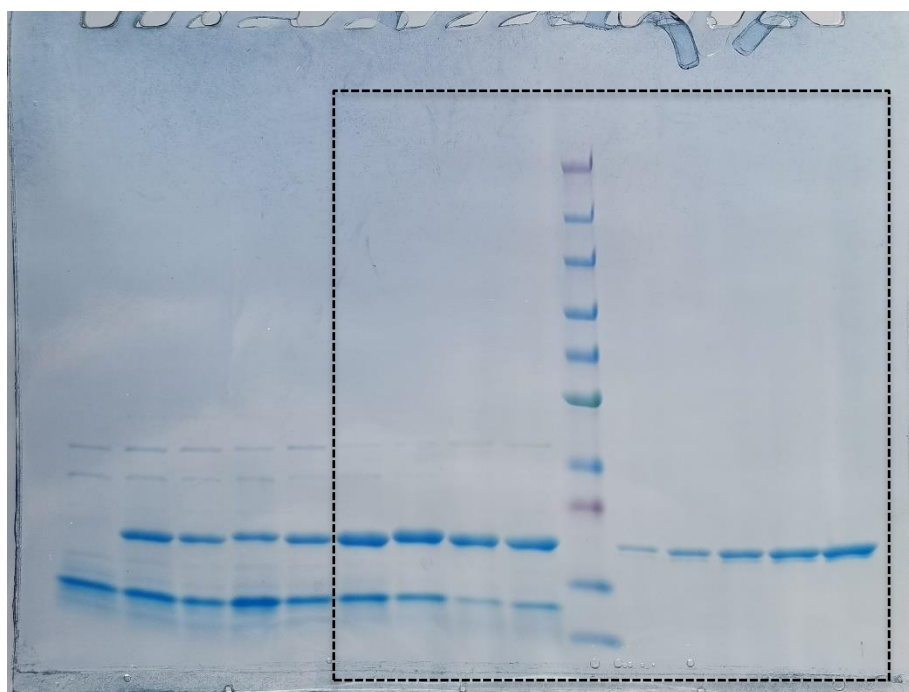

**Gel 6:** Uncropped sodium dodecyl sulfate–polyacrylamide gel electrophoresis (SDS-PAGE) gel of Supplementary Fig.7a. The parts displayed in Fig. 7a are highlighted in dashed rectangles.

## Supplementary Information

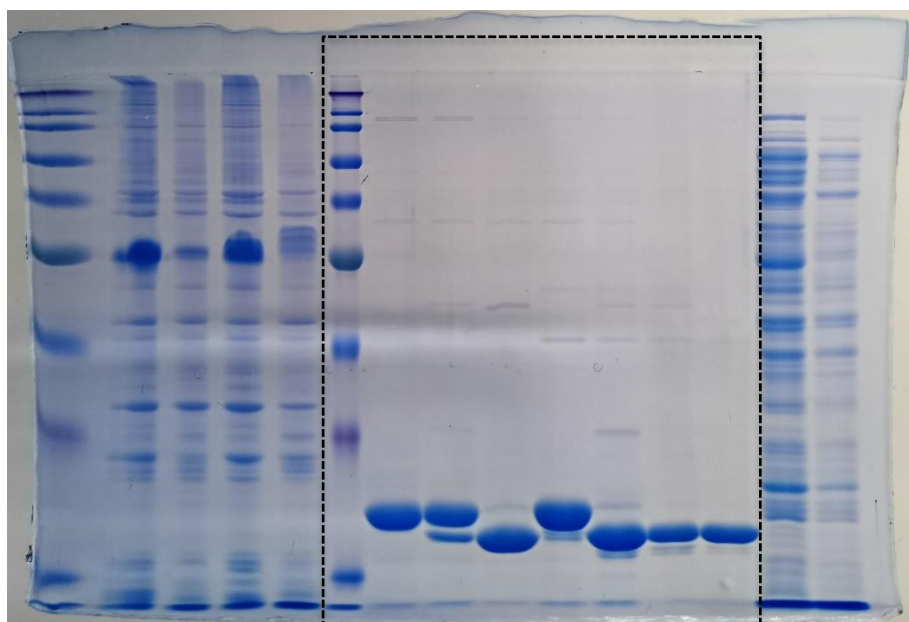

**Gel 7:** Uncropped sodium dodecyl sulfate–polyacrylamide gel electrophoresis (SDS-PAGE) gel of Supplementary Fig. 9a. The parts displayed in Fig. 9a are highlighted in dashed rectangles.

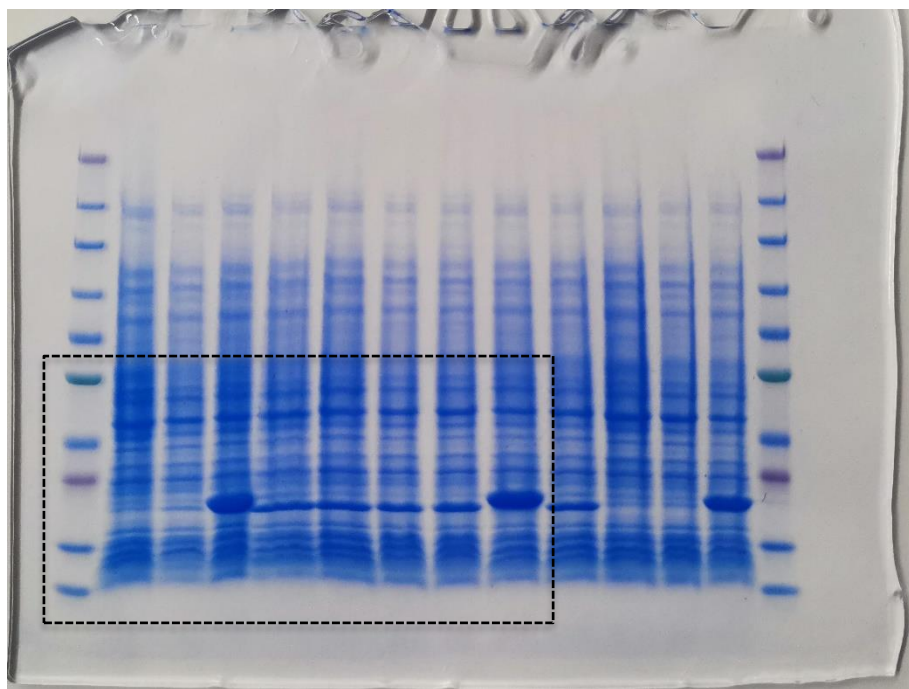

**Gel 8:** Uncropped sodium dodecyl sulfate–polyacrylamide gel electrophoresis (SDS-PAGE) gel of Supplementary Fig. 9d. The parts displayed in Fig. 9d are highlighted in dashed rectangles.



## Supplementary Information

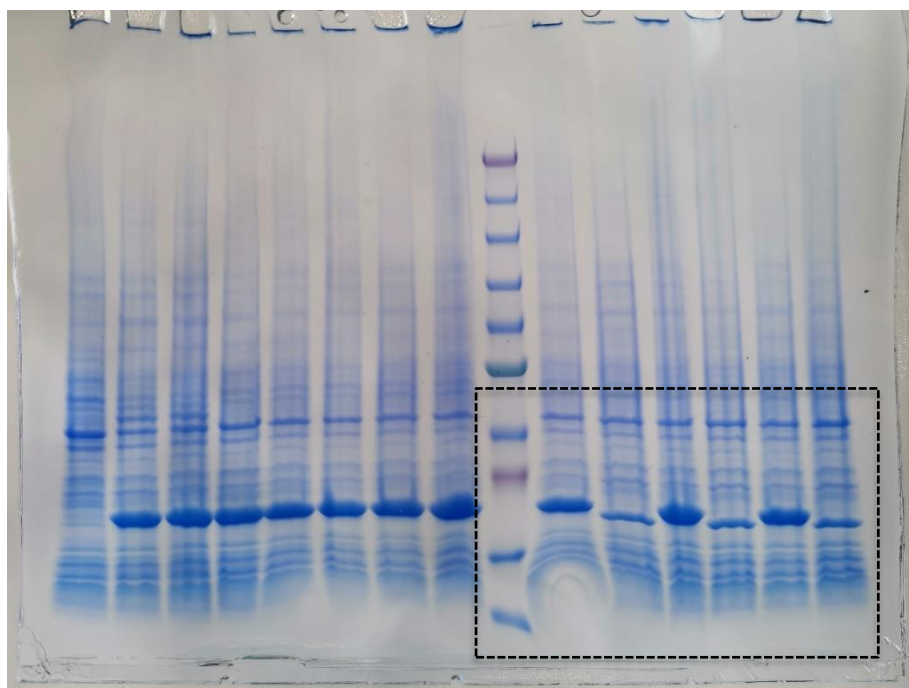

**Gel 9:** Uncropped sodium dodecyl sulfate–polyacrylamide gel electrophoresis (SDS-PAGE) gel of Supplementary Fig. 15a. The parts displayed in Fig. 15a are highlighted in dashed rectangles.

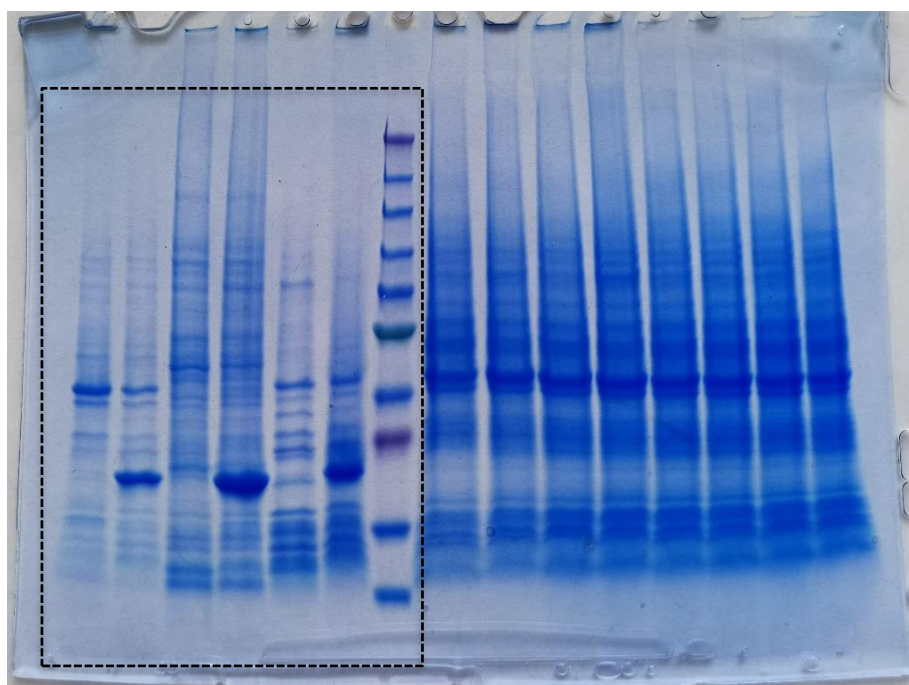

**Gel 10:** Uncropped sodium dodecyl sulfate–polyacrylamide gel electrophoresis (SDS-PAGE) gel of Supplementary Fig. 16b. The parts displayed in Fig. 16b are highlighted in dashed rectangles.

## Supplementary Information

### 5. References

1. Jeschek, M. et al. Directed evolution of artificial metalloenzymes for in vivo metathesis. *Nature* **537**, 661-665 (2016).
2. Fischer, S., Ward, T.R. & Liang, A.D. Engineering a Metathesis-Catalyzing Artificial Metalloenzyme Based on HaloTag. *ACS Catal.* **11**, 6343-6347 (2021).
3. Sabatino, V., Rebelein, J.G. & Ward, T.R. "Close-to-Release": Spontaneous Bioorthogonal Uncaging Resulting from Ring-Closing Metathesis. *J. Am. Chem. Soc.* **141**, 17048-17052 (2019).
4. Ax, A. et al. Cyclic sulfamide HIV-1 protease inhibitors, with sidechains spanning from P2/P2' to P1/P1'. *Bioorgan. Med. Chem.* **13**, 755-764 (2005).
5. Schmidt, B., Krehl, S. & Jablowski, E. Assisted tandem catalytic RCM-aromatization in the synthesis of pyrroles and furans. *Org. Biomol. Chem.* **10**, 5119-5130 (2012).
6. Anglada, L., Marquez, M., Sacristan, A. & Ortiz, J.A. Inhibitors of gastric acid secretion: N-sulphonyl formamidines in a series of new histamine H<sub>2</sub>-receptor antagonists. *Eur. J. Med. Chem.* **23**, 97-100 (1988).
7. Jullien, H. et al. Cyclometalated N-Heterocyclic Carbene-Platinum Catalysts for the Enantioselective Cycloisomerization of Nitrogen-Tethered 1,6-Enynes. *Adv. Synth. Catal.* **353**, 1109-1124 (2011).
8. Lübke, C., Dumrath, A., Neumann, H., Beller, M. & Kadyrov, R. Lewis Acid Assisted Ruthenium-Catalyzed Metathesis Reactions. *ChemCatChem* **6**, 105-108 (2014).
9. Kawauchi, D. et al. Aerobic Dehydrogenation of N-Heterocycles with Grubbs Catalyst: Its Application to Assisted-Tandem Catalysis to Construct N-Containing Fused Heteroarenes. *Chem. Eur. J.* **26**, 15793-15798 (2020).
10. Frisch, M.J. et al. (Wallingford, CT; 2016).
11. Grimme, S., Ehrlich, S. & Goerigk, L. Effect of the Damping Function in Dispersion Corrected Density Functional Theory. *J. Comput. Chem.* **32**, 1456-1465 (2011).
12. O'Boyle, N.M. et al. Open Babel: An open chemical toolbox. *J. Cheminf.* **3** (2011).
13. Dou, J.Y. et al. De novo design of a fluorescence-activating  $\beta$ -barrel. *Nature* **561**, 485-491 (2018).

## Supplementary Information

14. Jumper, J. et al. Highly accurate protein structure prediction with AlphaFold. *Nature* **596**, 583-589 (2021).
15. Kalvet, I.Z., Z., Edn. January 7, 2025 (Zenodo, Zenodo; 2025).
16. Doyle, L. et al. Rational design of alpha-helical tandem repeat proteins with closed architectures. *Nature* **528**, 585-588 (2015).
17. Maguire, J.B. et al. Perturbing the energy landscape for improved packing during computational protein design. *Proteins: Struct., Funct., Bioinf.* **89**, 436-449 (2021).
18. Kabsch, W. XDS. *Acta Crystallogr. D Biol. Crystallogr.* **66**, 125-132 (2010).
19. Evans, P.R. & Murshudov, G.N. How good are my data and what is the resolution? *Acta Crystallogr. D Biol. Crystallogr.* **69**, 1204-1214 (2013).
20. Potterton, L. et al. CCP4i2: the new graphical user interface to the CCP4 program suite. *Acta Crystallogr. D. Struct. Biol.* **74**, 68-84 (2018).
21. Vagin, A. & Teplyakov, A. Molecular replacement with MOLREP. *Acta Crystallogr. D Biol. Crystallogr.* **66**, 22-25 (2010).
22. Murshudov, G.N. et al. REFMAC5 for the refinement of macromolecular crystal structures *Acta Crystallogr. D Biol. Crystallogr.* **67**, 355-367 (2011).
23. Emsley, P., Lohkamp, B., Scott, W.G. & Cowtan, K. Features and development of Coot. *Acta Crystallogr. D Biol. Crystallogr.* **66**, 486-501 (2010).
24. Moriarty, N.W., Grosse-Kunstleve, R.W. & Adams, P.D. electronic Ligand Builder and Optimization Workbench (eLBOW): a tool for ligand coordinate and restraint generation. *Acta Crystallogr. D Biol. Crystallogr.* **65**, 1074-1080 (2009).
25. Moriarty, N.W., Draizen, E.J. & Adams, P.D. An editor for the generation and customization of geometry restraints. *Acta Crystallogr. D Struct. Biol.* **73**, 123-130 (2017).
26. Grimm, A.R. et al. A Whole Cell Display Platform for Artificial Metalloenzymes: Poly(phenylacetylene) Production with a Rhodium-Nitrobindin Metalloprotein. *ACS Catal.* **8**, 2611-2614 (2018).
27. Discovery, C. et al. Chai-1: Decoding the molecular interactions of life. *bioRxiv*, 2024.2010.2010.615955 (2024).

## Supplementary Information

28. Abramson, J. et al. Accurate structure prediction of biomolecular interactions with AlphaFold 3. *Nature* **630**, 493-500 (2024).
29. Wohlwend, J. et al. Boltz-1 Democratizing Biomolecular Interaction Modeling. *bioRxiv*, 2024.2011.2019.624167 (2024).
30. Anishchenko, I. et al. Modeling protein-small molecule conformational ensembles with ChemNet. *bioRxiv*, 2024.2009.2025.614868 (2024).
31. Park, H., Zhou, G.F., Baek, M., Baker, D. & DiMaio, F. Force Field Optimization Guided by Small Molecule Crystal Lattice Data Enables Consistent Sub-Angstrom Protein-Ligand Docking. *J. Chem. Theory Comput.* **17**, 2000-2010 (2021).
